# Supplementary material for: What does Google say about credit developments in Brazil?
Source: publisher site journal article supplement (doi:10.1515/snde-2019-0122), 2021-08-30
Supplement: Supplementary file 1 [file j_snde-2019-0122_suppl.zip]

## Sheet: Plan1
	conc_cred_pessoal_ant	conc_cred_pessoal_nov	sld_cred_total_rl	sld_cred_total_rl_ant	tx_juros_rl_total	tx_juros_rl_total_ant	tx_juros_cred_pessoal	conc_rl_total_encad	conc_rl_pj_encad	conc_rl_pf_encad	renda_real	ibc_br	massa_pnad	massa_pnad_disp	ipca_am	ipca_index	ipca_aa	conc_cred_pessoal_real	sld_cred_total_rl_real	conc_rl_total_enc_real	conc_rl_pj_enc_real	conc_rl_pf_enc_real	hits_cred	hits_cred2	hits_emp	hits_fin	caged_bra	tx_juros_cred_pessoal_real	ibc_br_sa_yoy	ibc_br_sa_at	ibc_br_sa_as	massa_pnad_yoy	massa_pnad_at	massa_pnad_disp_yoy	massa_pnad_disp_at
	3994 - Concessões consolidadas das operações de crédito com recursos livres referenciais para taxa de juros - Crédito pessoal - u.m.c. (mil)	20672 - Concessões de crédito com recursos livres - Pessoas físicas - Crédito pessoal total - R$ (milhões)	20542 - Saldo da carteira de crédito com recursos livres - Total - R$ (milhões)	3958 - Saldo consolidado no mês das operações de crédito com recursos livres referenciais para taxa de juros - Total geral - u.m.c. (mil)	20717 - Taxa média de juros das operações de crédito com recursos livres - Total - % a.a.	8287 - Taxa média mensal (pré-fixada, pós-fixada e flutuante) das operações de crédito com recursos livres referenciais para taxa de juros - Total geral - % a.a.	20748 - Taxa média de juros das operações de crédito com recursos livres - Pessoas físicas - Crédito pessoal total - % a.a.	21277 - Concessões de crédito com recursos livres - Série encadeada ao crédito referencial - Total - R$ (milhões)	21278 - Concessões de crédito com recursos livres - Série encadeada ao crédito referencial - Pessoas jurídicas - Total - R$ (milhões)	21279 - Concessões de crédito com recursos livres - Série encadeada ao crédito referencial - Pessoas físicas - Total - R$ (milhões)	Antes de 2012 - massa real da PME. Depois de mar/2012, massa real da PNAD	24364 - Índice de Atividade Econômica do Banco Central (IBC-Br) - com ajuste sazonal - Índice	22078 - Massa salarial ampliada - PNADC (média móvel trimestral) - R$ (milhões)	22079 - Massa Salarial Ampliada Disponível - PNADC (média móvel trimestral) - R$ (milhões)	433 - Índice nacional de preços ao consumidor-amplo (IPCA) - Var. % mensal
1994-07-01							243.47								6.84	100
1994-08-01							188.07								1.86	101.86
1994-09-01							199.38								1.53	103.418
1994-10-01							211.65								2.62	106.128
1994-11-01							226.58								2.81	109.11
1994-12-01							218.26								1.71	110.976
1995-01-01							214.78								1.7	112.863											-22433
1995-02-01							221.93								1.02	114.014											60198
1995-03-01							235.07								1.55	115.781											21193
1995-04-01							251.7								2.43	118.594											79786
1995-05-01							230.54								2.67	121.761											83053
1995-06-01							220.07								2.26	124.513											1107
1995-07-01							209.37								2.36	127.451	0.274513										-70928	142.736
1995-08-01							210.61								0.99	128.713	0.263627										-123328	145.808
1995-09-01							205.59								0.99	129.987	0.256906										-72358	143.129
1995-10-01							197.39								1.41	131.82	0.242086										-48661	139.428
1995-11-01							193.57								1.47	133.758	0.225897										-77051	139.474
1995-12-01							183.2								1.56	135.844	0.224089										-30824	131.356
1996-01-01							163.7								1.34	137.665	0.219756										-62111	116.191
1996-02-01							152.86								1.03	139.083	0.219876										-27489	107.283
1996-03-01							142.59								0.35	139.57	0.205461										-35913	101.242
1996-04-01							137.99								1.26	141.328	0.191692										61047	99.7076
1996-05-01							133.74								1.22	143.052	0.174862										107240	98.951
1996-06-01							131.33								1.19	144.755	0.162569										53017	98.9818
1996-07-01							125.66								1.11	146.361	0.148372										9110	96.5043
1996-08-01							120.54								0.44	147.005	0.142118										-12175	93.0975
1996-09-01							120.51								0.15	147.226	0.132618										21353	94.6906
1996-10-01			85451.9	74723882			109.76								0.3	147.668	0.120221		321777								-39755	87.2488
1996-11-01			89524.9	78285546			107.62								0.32	148.14	0.107525		336039								-65337	87.4631
1996-12-01			88598	77475045			111.31								0.47	148.836	0.0956381		331004								-280213	92.8648
1997-01-01			90567.4	79197178			111.31								1.18	150.593	0.0939082		334416								-43115	93.1698
1997-02-01			90444.3	79089590			109.38								0.5	151.346	0.0881696		332300								6361	92.4149
1997-03-01			94959.8	83038192			107.14								0.51	152.117	0.0899046		347120								58881	90.0533
1997-04-01			96440.3	84332786			99.13								0.88	153.456	0.0858145		349456								91159	83.3923
1997-05-01			98595.7	86217579			103.36								0.41	154.085	0.0771254		355808								128952	88.7988
1997-06-01			100139	87567012			103.9								0.54	154.917	0.0702064		359436								79930	90.524
1997-07-01			99859.1	87322333			103.11								0.22	155.258	0.0607862		357645								-7502	91.4712
1997-08-01			100651	88014764			104.05								-0.02	155.227	0.0559279		360553								3748	93.2424
1997-09-01			100814	88157468			101.59								0.06	155.32	0.054979		360921								39171	91.0844
1997-10-01			101474	88734642			102.47								0.23	155.677	0.0542427		362450								7970	92.0525
1997-11-01			100756	88106568			134.52								0.17	155.942	0.0526664		359274								-65646	122.787
1997-12-01			97810.6	85531050			135.46								0.43	156.613	0.0522473		347278								-335644	123.769
1998-01-01			96777.9	84627958			134.95								0.71	157.725	0.0473594		341189								-85320	124.326
1998-02-01			97018.4	84838329			133.83								0.46	158.45	0.0469426		340471								-22128	123.346
1998-03-01			96801.3	84648454			123.18								0.34	158.989	0.0451718		338558								-10705	113.534
1998-04-01			97312.5	85095449			120.49								0.24	159.37	0.0385411		339531								75646	112.307
1998-05-01			96460.4	84350321			115.9								0.5	160.167	0.0394719		334883								85371	107.702
1998-06-01			96629	84497831			116.17								0.02	160.199	0.0340957		335402								18097	109.043
1998-07-01			95992.3	83941057			109.11								-0.12	160.007	0.0305875		333592								-21454	102.904
1998-08-01			96097.3	84032870			103.77								-0.51	159.191	0.0255366		335669								22213	98.696
1998-09-01			94430.2	82575042			117.71								-0.22	158.841	0.0226668		330573								-23202	112.885
1998-10-01			93583.6	81834709			123.84								0.02	158.873	0.0205242		327544								-64093	119.338
1998-11-01			93395.8	81670460			120.13								-0.12	158.682	0.0175697		327279								-118412	116.329
1998-12-01			91354.5	79885481			119.98								0.33	159.206	0.0165564		319073								-437758	116.397
1999-01-01			92545.6	80927010			119.91								0.7	160.32	0.0164555		320986								-41211	116.35
1999-02-01			93799.2	82023281			127.26								1.05	162.003	0.0224251		321954								-78030	122.275
1999-03-01			93307	81592841			126.02								1.1	163.785	0.0301692		316780								-76312	119.401
1999-04-01			94510.1	82644929			119.41								0.56	164.703	0.0334579		319078								57543	112.307
1999-05-01			93996.3	82195600			109.71								0.3	165.197	0.0314012		316394								97182	103.325
1999-06-01			95177.4	83228458			101.76								0.19	165.511	0.0331543		319762								58109	95.2855
1999-07-01			97742.3	85471309			102.02								1.09	167.315	0.0456705		324838								8057	93.1966
1999-08-01			98469.9	86107550			100.52								0.56	168.252	0.0569165		325434								13306	89.7217
1999-09-01			101915	89119784			97.94								0.31	168.773	0.0625305		335777								7207	86.2911
1999-10-01			104648	91510415			94.03								1.19	170.782	0.0749596		340730								17439	80.4998
1999-11-01			107517	94019299			90.31								0.95	172.404	0.0864755		346777								-16170	75.1627
1999-12-01			105812	92527844			86.56								0.6	173.439	0.0893993		339241								-243121	71.2503
2000-01-01			107432	93944582			75.56								0.62	174.514	0.0885339		342312								31198	61.2812
2000-02-01			108285	94690140			76.49								0.13	174.741	0.0786234		344581								88175	63.6252
2000-03-01			110641	96750610			68.94								0.22	175.125	0.0692348		351306								39947	58.0008
2000-04-01			117960	103150620			68.08								0.42	175.861	0.0677462		372979								125071	57.4157
2000-05-01			141203	123476015			66.7								0.01	175.878	0.064659		446428								162837	56.576
2000-06-01	2201530	2236.2	143010	125055951	45.3378	46.25	70.05	51896	34279	17617					0.23	176.283	0.0650841	7053.75	451103	163698	108128	55570.1					142884	59.6588
2000-07-01	2151815	2185.71	145935	127613691	43.1714	44.04	70.57	52181	34715	17467					1.61	179.121	0.0705628	6785.22	453035	161989	107768	54223.9					105842	59.3274
2000-08-01	2604805	2645.83	148963	130261400	42.4852	43.34	69.92	53161	35023	18138					1.31	181.467	0.0785473	8107.41	456455	162897	107318	55578.8					78845	57.5452
2000-09-01	2499707	2539.08	155824	136260999	41.946	42.79	71.62	52789	35633	17157					0.23	181.885	0.0776871	7762.44	476383	161386	108937	52452.2					92678	59.2484
2000-10-01	2719934	2762.77	163533	143002493	42.2793	43.13	72.52	57777	38529	19248					0.14	182.139	0.0665045	8434.51	499253	176388	117626	58762.5					15442	61.7621
2000-11-01	2591728	2632.55	172003	150408712	41.9656	42.81	72	58781	39723	19059					0.32	182.722	0.0598487	8011.31	523434	178881	120884	57999.9					466	62.2873
2000-12-01	2621565	2662.85	176061	153957523	40.8873	41.71	67.72	62538	43682	18856					0.59	183.8	0.0597434	8056.01	532642	189198	132152	57045.6					-225789	58.2647
2001-01-01	2929537	2975.68	179604	157056161	40.956	41.78	67.31	62252	41624	20628					0.57	184.848	0.0592168	8951.37	540283	187265	125213	62052.8					48796	57.9563
2001-02-01	2678791	2720.98	185330	162063065	41.054	41.88	70.94	55388	36901	18487					0.46	185.698	0.0627077	8147.72	554954	165854	110497	55357.6					80243	60.8533
2001-03-01	3358952	3411.85	194903	170434476	41.1422	41.97	68.41	67136	44304	22832					0.38	186.404	0.0644043	10177.8	581411	200271	132162	68109.5					34484	58.22
2001-04-01	3031060	3078.8	202113	176738872	42.7597	43.62	73.06	63096	42308	20788					0.58	187.485	0.0661002	9131.31	599441	187134	125480	61654.5					139997	62.33
2001-05-01	3301272	3353.27	207895	181795024	43.5537	44.43	72.06	68250	45549	22701					0.41	188.254	0.0703642	9904.74	614072	201594	134541	67053.3					161898	60.749
2001-06-01	2838954	2883.67	210930	184448570	43.7105	44.59	74.4	65064	43778	21286					0.52	189.233	0.0734611	8473.59	619812	191189	128641	62548.5					108571	62.4651
2001-07-01	2871244	2916.47	215280	188252749	47.3376	48.29	78.58	68892	47021	21870					1.33	191.749	0.070503	8457.49	624292	199781	136357	63421					71386	66.8188
2001-08-01	3159887	3209.65	220539	192851777	49.5726	50.57	83.07	68734	46176	22559					0.7	193.092	0.0640574	9243.01	635098	197937	132975	64964.3					47327	72.049
2001-09-01	2769566	2813.19	227015	198514976	49.3863	50.38	86.21	63254	42822	20433					0.28	193.632	0.0645882	8078.66	651923	181647	122972	58677.7					80028	74.9127
2001-10-01	3028317	3076.01	228600	199900434	50.896	51.92	89.17	72340	49022	23317					0.83	195.24	0.0719236	8760.7	651069	206030	139618	66408.5					77187	76.4771
2001-11-01	2643513	2685.15	226363	197944122	48.4159	49.39	87.49	68346	45999	22347					0.71	196.626	0.0760908	7593.58	640152	193282	130085	63197.2					-4915	74.2325
2001-12-01	2661601	2703.52	221973	194105573	48.063	49.03	84.25	69180	47685	21494					0.65	197.904	0.0767326	7596.16	623684	194377	133982	60392.3					-253923	71.1195
2002-01-01	3083446	3132.01	225359	197066721	48.6903	49.67	84.73	67738	45113	22625					0.52	198.933	0.0761973	8754.58	629923	189341	126100	63241.3					44228	71.6507
2002-02-01	2764372	2807.91	226100	197714533	48.0532	49.02	83.68	60652	40404	20249					0.36	199.649	0.075126	7820.5	629727	168926	112532	56396.9					82013	70.8451
2002-03-01	2941078	2987.4	227473	198915312	47.5042	48.46	83.64	64119	42347	21772					0.6	200.847	0.0774824	8270.78	629773	177517	117240	60277					90260	70.4343
2002-04-01	3229426	3280.29	230481	201545040	47.2689	48.22	83.09	70459	46353	24105					0.8	202.454	0.0798392	9009.59	633034	193522	127312	66206.4					175090	69.553
2002-05-01	3188861	3239.08	233501	204186087	47.1415	48.09	81.99	68531	44928	23603					0.21	202.879	0.0776883	8877.78	639985	187832	123140	64691.8					155813	68.8707
2002-06-01	2797383	2841.44	239584	209505770	46.0436	46.97	80.77	67457	45642	21815					0.42	203.731	0.0766162	7755.33	653913	184115	124574	59541.1					133346	67.9057
2002-07-01	2977313	3024.2	243737	213137600	45.7593	46.68	82.79	73723	49810	23913					1.19	206.155	0.0751287	8157.09	657425	198851	134351	64499.8					61227	70.0169
2002-08-01	2888250	2933.74	238134	208237789	45.3966	46.31	83.69	69217	46226	22991					0.65	207.495	0.0745949	7861.98	638163	185491	123879	61612.4					78022	70.9388
2002-09-01	2884925	2930.36	250176	218767645	42.7009	43.56	85.42	70384	47085	23300					0.72	208.989	0.0793099	7796.79	665641	187270	125279	61994.1					167312	71.795
2002-10-01	3000440	3047.7	244823	214086561	44.8084	45.71	88.82	75759	51195	24564					1.31	211.727	0.0844479	8004.13	642974	198965	134453	64512.1					36368	74.1162
2002-11-01	2564821	2605.22	244621	213910083	49.1805	50.17	93.26	72859	49416	23442					3.02	218.121	0.109322	6641.47	623611	185739	125976	59760.7					-11751	74.2145
2002-12-01	2480299	2519.36	242881	212388379	49.9647	50.97	91.84	79987	55461	24526	67.7859				2.1	222.702	0.125303	6290.51	606440	199717	138479	61238.1					-249514	70.4785
2003-01-01	2625251	2666.6	243589	213007859	53.131	54.2	95.28	75751	51432	24318	65.3616	100.46			2.25	227.713	0.14467	6511.62	594825	184978	125593	59382.6					35485	70.5993
2003-02-01	3003577	3050.88	232404	203226843	55.366	56.48	98.9	72155	47848	24306	65.0456	101.95			1.57	231.288	0.158471	7334.86	558739	173473	115035	58435.9					84029	71.6918		1.48318
2003-03-01	3039274	3087.14	246419	215482612	56.8266	57.97	100.63	74961	50011	24950	64.2245	102.11			1.23	234.133	0.165726	7331.85	585236	178030	118774	59255.3					21261	72.1073		0.15694
2003-04-01	3175501	3225.51	245422	214610626	56.7776	57.92	98.67	78879	53199	25680	63.4337	101.13			0.97	236.404	0.167692	7586.89	577269	185535	125132	60403.2					154024	70.139		-0.959749
2003-05-01	3265498	3316.93	245406	214597115	56.6208	57.76	98.09	78749	51983	26767	62.5043	99.73			0.61	237.846	0.172353	7754.6	573732	184106	121530	62578.2					140313	68.9679		-1.38436
2003-06-01	3069320	3117.66	245269	214477214	55.6013	56.72	96.56	74392	48555	25837	62.9068	100.34			-0.15	237.489	0.165699	7299.69	574273	174181	113687	60494.7					125795	68.6199		0.611651
2003-07-01	3288551	3340.34	243162	212634259	53.7878	54.87	91.71	78797	51526	27271	62.1198	99.03			0.2	237.964	0.154294	7805.47	568202	184127	120402	63724.8					37233	66.0842		-1.30556
2003-08-01	3210724	3261.29	244639	213925940	51.641	52.68	87.5	73845	48013	25832	63.5108	99.8			0.34	238.773	0.150739	7594.92	569717	171971	111813	60157.7					79772	62.9388		0.777542
2003-09-01	3681282	3739.26	246930	215929402	48.8178	49.8	83.92	81086	53179	27907	62.755	101.73			0.78	240.635	0.151424	8640.62	570602	187372	122885	64487					161765	59.7326		1.93387
2003-10-01	3884268	3945.44	249240	217949708	47.6022	48.56	83.27	83532	54329	29203	62.4686	101.57			0.29	241.333	0.139832	9090.7	574275	192466	125180	67286.7					70870	60.7869		-0.157279
2003-11-01	3396912	3450.41	253878	222005421	47.0925	48.04	81.97	78289	51572	26717	63.0415	101.97			0.34	242.154	0.11018	7923.16	582979	179775	118424	61350.1					34804	63.9104		0.393817
2003-12-01	4345343	4413.78	256416	224224353	44.9163	45.82	80.32	92163	62075	30088	63.2281	101.6			0.52	243.413	0.0929995	10082.9	585760	210539	141805	68733.5					-299918	64.9772		-0.362852	-0.00330186
2004-01-01	3981335	4044.04	256914	224659626	44.4948	45.39	79.06	78618	50935	27683	62.2747	103.58			0.76	245.263	0.0770722	9168.58	582471	178241	115479	62762.5	100	0	49	75	100106	66.247	3.10571	1.94882	0.986281
2004-02-01	3869022	3929.96	261793	228926688	44.2399	45.13	76.63	73845	48166	25679	62.4664	104.57			0.61	246.759	0.0668921	8855.92	589935	166405	108539	57866	81	73	27	55	139074	65.5556	2.56989	0.955783	2.13904
2004-03-01	4878711	4955.55	266015	232618701	44.4457	45.34	76.54	93154	61496	31658	63.7011	105.97	68306.8	63962.9	0.47	247.919	0.0588822	11114.8	596645	208935	137929	71005.6	92	50	38	65	108212	66.723	3.78024	1.33882	2.90814
2004-04-01	4553873	4625.6	274200	239776129	43.8478	44.73	75.26	87589	58187	29403	63.4732	106.6	69006.2	64308.2	0.37	248.836	0.05259	10336.5	612736	195729	130026	65704.8	78	77	47	55	187547	66.5036	5.40888	0.594508	3.66822		1.02391		0.539844
2004-05-01	4780106	4855.39	283810	248179659	43.338	44.21	72.67	89962	59743	30219	63.1914	106.29	69906.3	65041.2	0.51	250.105	0.0515438	10794.9	630993	200012	132826	67185.6	83	31	54	55	291822	64.2062	6.57776	-0.290807	3.99874		1.30438		1.13982
2004-06-01	4746083	4820.83	287872	251730942	43.093	43.96	71.89	91070	60872	30199	64.2088	107.27	71770.3	66853.2	0.71	251.881	0.0606006	10642.5	635510	201048	134382	66667.8	85	92	36	58	207895	62.0685	6.90652	0.922006	4.71851		2.66643		2.78593
2004-07-01	4839074	4915.29	290688	254194151	43.0341	43.9	71.66	92307	61362	30946	65.3615	107.77	72955.5	68198.6	0.91	254.173	0.0681159	10753.2	635941	201941	134242	67700.8	73	100	40	62	202033	60.7129	8.82561	0.466114	4.62433		1.65138		2.01247
2004-08-01	5083296	5163.36	295468	258373865	43.0538	43.92	73.82	94350	62373	31977	64.5099	108.24	74062.8	69307.4	0.69	255.927	0.0718416	11218.5	641968	204996	135519	69476.9	77	54	26	57	229757	62.1695	8.45691	0.436114	4.40961		1.51777		1.62584
2004-09-01	4961655	5039.8	300919	263140624	44.2007	45.09	73.87	93218	61739	31479	66.5007	109.47	73784.2	68990	0.33	256.771	0.0670557	10914	651662	201870	133700	68170	88	27	27	51	199742	62.9437	7.60838	1.13636	4.25992		-0.376167		-0.45796
2004-10-01	5179826	5261.41	308855	270080072	44.3183	45.21	71.87	97532	64996	32536	65.735	108.51	73983.4	69400.5	0.44	257.901	0.0686516	11344	665917	210287	140137	70150.3	83	27	37	52	130159	60.8288	6.83273	-0.876953	3.72583		0.269976		0.595014
2004-11-01	5248270	5330.93	311900	272742744	44.3281	45.22	70.93	101803	66919	34884	66.5529	109.62	74074.1	69355.5	0.69	259.681	0.0723792	11415.2	667874	217992	143294	74697.4	84	55	28	60	79022	59.3932	7.50221	1.02295	3.54274		0.122595		-0.064841
2004-12-01	5706385	5796.26	310347	271384922	43.7007	44.58	68.37	107542	72295	35248	64.8694	108.82	79713.9	73849.1	0.86	261.914	0.0760064	12305.7	658882	228317	153486	74833.2	74	42	39	51	-352093	56.4768	7.1063	-0.729794	2.86151		7.61373		6.47908
2005-01-01	5792048	5883.27	317356	277513628	45.2692	46.18	71.17	99128	66180	32948	65.7539	109.64	80560.2	74566.5	0.58	263.433	0.0740842	12418.4	669877	209240	139693	69546.9	77	53	43	73	115972	59.3637	5.85055	0.753538	2.47936		1.06167		0.97144
2005-02-01	5612331	5700.72	325796	284894607	45.524	46.44	70	93612	61752	31860	66.0139	110.19	81584.6	75717	0.59	264.987	0.0738707	11962.5	683660	196438	129582	66855.9	70	28	32	67	73285	58.3058	5.37439	0.501642	2.19734		1.2716		1.54292
2005-03-01	6931521	7040.69	332868	291078482	45.7397	46.66	68.71	108201	71157	37044	66.4823	110.47	77045.2	72094.3	0.61	266.604	0.0753671	14684.8	694264	225675	148412	77262.8	69	40	49	52	102965	56.886	4.24648	0.254107	1.79822	12.7929	-5.56404	12.7127	-4.78453
2005-04-01	6349404	6449.41	342466	299471603	46.171	47.1	68.68	104495	69231	35264	65.5372	111.1	77733.5	72242.4	0.87	268.923	0.0807241	13335.5	708122	216066	143150	72915.9	75	33	46	53	266095	56.0805	4.22139	0.570291	1.89792	12.6471	0.893372	12.3378	0.205425
2005-05-01	6548290	6651.42	345416	302051237	46.8866	47.83	69.93	111586	72962	38624	65.1937	110.92	78324.1	72568.2	0.49	270.241	0.0805091	13686.2	710739	229603	150129	79474	71	18	44	54	212450	57.2685	4.35601	-0.162016	1.57633	12.0415	0.759775	11.5727	0.450982
2005-06-01	6439875	6541.3	350501	306497273	46.3867	47.32	68.56	111477	72806	38672	66.4428	110.57	80415.4	74675.9	-0.02	270.187	0.072677	13462.3	721345	229424	149838	79588.7	72	36	46	58	195536	57.1396	3.07635	-0.315543	1.60324	12.0455	2.67006	11.7013	2.90444
2005-07-01	6009714	6104.37	357192	312348781	46.2887	47.22	69.41	105630	68392	37238	67.7236	110.65	81899.9	76475.5	0.25	270.862	0.0656611	12531.7	733284	216849	140403	76446.3	61	19	40	61	117473	58.9717	2.67236	0.0723524	1.46722	12.2601	1.84604	12.1365	2.40988
2005-08-01	6620213	6724.48	363124	317535537	46.4847	47.42	69.47	114694	74060	40634	68.8341	111.26	82877.6	77389.5	0.17	271.323	0.0601577	13781.3	744195	235057	151781	83276.4	65	49	51	56	135460	59.8536	2.7901	0.551288	1.32876	11.9018	1.19377	11.6612	1.19515
2005-09-01	6298566	6397.77	369778	323354719	47.1709	48.12	70.55	112335	72777	39558	69.1016	110.94	82109.2	76772.5	0.35	272.272	0.060369	13066	755190	229419	148631	80788.5	63	15	35	55	189458	60.8402	1.34283	-0.287615	1.2461	11.2829	-0.92715	11.2806	-0.797266
2005-10-01	5617721	5706.2	377475	330085202	47.2003	48.15	70.27	109768	71860	37908	68.4288	110.86	81829.2	76230.5	0.75	274.314	0.0636418	11566.9	765170	222508	145666	76842.4	64	44	36	60	118175	60.0821	2.1657	-0.0721111	0.812318	10.6048	-0.341009	9.84143	-0.705982
2005-11-01	5753187	5843.8	386520	337994991	46.122	47.05	68.74	115499	75619	39880	68.96	111.82	84193.4	78324.1	0.55	275.823	0.0621629	11781	779220	232845	152447	80397.6	72	29	36	64	13831	58.8645	2.00693	0.865957	0.750219	13.6611	2.88919	12.9313	2.74641
2005-12-01	6067850	6163.42	389539	340634547	45.0241	45.93	67.28	120934	79964	40970	70.3389	112.3	90363.6	83103.5	0.36	276.816	0.0568973	12380.8	782489	242927	160628	82298.8	55	31	28	51	-286719	58.2746	3.19794	0.429261	0.745222	13.3599	7.3286	12.5315	6.10208
2006-01-01	6678666	6783.85	393236	343867597	45.1515	46.06	68.92	112173	72227	39946	68.0606	113.38	91899	84991.1	0.59	278.449	0.0570024	13547.2	785282	224007	144235	79771.1	54	28	42	70	86616	59.8104	3.41116	0.96171	1.00316	14.0749	1.69914	13.9803	2.27138
2006-02-01	6284521	6383.5	400545	350258758	45.2986	46.21	68.59	97245	62443	34801	68.9725	113.62	90591.3	84091.8	0.41	279.591	0.055111	12695.6	796612	193403	124188	69212.9	55	43	36	54	176632	59.7841	3.11281	0.211678	1.19554	11.0397	-1.42298	11.0607	-1.05811
2006-03-01	7885725	8009.92	408600	357302919	44.8182	45.72	67.81	129232	82917	46314	69.1867	113.6	85474.3	80125.7	0.43	280.793	0.0532233	15862.1	809153	255919	164201	91715.8	58	16	34	58	76455	59.3299	2.83335	-0.0176025	1.5238	10.9405	-5.64845	11.1401	-4.71639
2006-04-01	6779703	6886.48	417896	365431382	44.1517	45.04	65.26	109246	70962	38284	69.0634	114.34	85832.7	79550.1	0.21	281.383	0.046332	13608.8	825827	215887	140232	75655.1	55	0	35	53	229803	57.9422	2.91629	0.651408	2.08358	10.4192	0.419307	10.1155	-0.718371
2006-05-01	7978917	8104.58	427024	373413825	42.9655	43.83	62.29	126575	82443	44133	70.6281	115.6	87156.4	80695.4	0.1	281.664	0.0422712	15999.9	843023	249882	162757	87126.5	58	49	37	56	198837	55.708	4.21926	1.10198	2.51314	11.2766	1.54219	11.1994	1.43972
2006-06-01	7177439	7290.48	430175	376168903	42.3578	43.21	62.16	116581	75770	40811	71.6856	114.73	89141.7	82443.2	-0.21	281.073	0.0402905	14423	851030	230636	149898	80737.8	55	31	38	51	155455	55.8795	3.76232	-0.752595	2.61144	10.8515	2.27786	10.4013	2.16592
2006-07-01	7541634	7660.41	436631	381814804	41.3285	42.16	59.78	116678	76224	40454	71.0919	116.92	90299.1	84151.3	0.19	281.607	0.0396678	15126.1	862165	230390	150511	79879.8	47	26	29	58	154357	53.6837	5.66652	1.90883	2.72161	10.2554	1.29838	10.0369	2.07185
2006-08-01	8134142	8262.25	439071	383948516	41.0344	41.86	59.12	123070	79959	43111	72.5167	116.6	90794.1	84395.5	0.05	281.748	0.0384224	16306.4	866550	242891	157807	85083.7	50	17	33	56	128915	53.2324	4.79957	-0.273691	2.8042	9.55204	0.548178	9.05291	0.290192
2006-09-01	7249768	7363.95	447496	391315601	40.7207	41.54	58.88	117887	76943	40944	72.2315	116.85	92745.8	86349.4	0.21	282.339	0.0369736	14503	881326	232174	151536	80637.6	52	34	27	55	176735	53.2151	5.3272	0.214408	2.88049	12.9542	2.14959	12.4744	2.31517
2006-10-01	7661788	7782.46	452762	395919959	40.554	41.37	58.58	125421	82238	43183	73.4225	117.98	92640.3	86255.7	0.33	283.271	0.0326508	15276.8	888763	246199	161432	84767.5	50	24	30	58	129795	53.566	6.42251	0.967052	2.88929	13.2118	-0.113752	13.1512	-0.108513
2006-11-01	7930961	8055.87	462233	404202035	40.1717	40.98	58.56	124774	81390	43384	73.6606	118.87	94583.8	88042.8	0.31	284.149	0.030186	15764.7	904551	244172	159273	84898.9	55	19	26	64	32579	53.914	6.30478	0.754365	2.79861	12.3411	2.0979	12.4083	2.07186
2006-12-01	7712239	7833.7	468255	409467912	39.0346	39.82	57.18	129637	86722	42915	74.4308	119.99	97748.9	89564.5	0.48	285.513	0.0314177	15256.7	911958	252477	168897	83579.9	41	17	23	49	-317493	52.3922	6.84773	0.942206	3.20166	8.17287	3.34634	7.77464	1.72836
2007-01-01	9045397	9187.86	470977	411848297	39.1522	39.94	57.23	126100	81305	44795	72.5923	119.67	98739.1	90799.4	0.44	286.769	0.0298797	17815.6	913241	244513	157653	86859.1	42	30	30	63	105468	52.6683	5.54772	-0.266689	3.07051	7.44306	1.013	6.83401	1.37878
2007-02-01	8380547	8512.54	480398	420086587	38.4857	39.26	54.47	111754	70469	41285	73.6401	120.19	98310.1	90557.2	0.44	288.031	0.0301874	16433.8	927428	215746	136043	79702.4	44	8	25	57	148019	49.9436	5.78243	0.434528	3.14546	8.52046	-0.434478	7.6885	-0.266742
2007-03-01	9990637	10148	490460	428885615	37.7505	38.51	53.42	131787	84342	47445	73.9478	119.42	94670.4	88459.6	0.37	289.097	0.0295719	19518.9	943363	253482	162226	91256.9	49	22	29	58	146141	49.0134	5.12324	-0.640652	3.03292	10.7589	-3.70226	10.401	-2.31633
2007-04-01	9153155	9297.31	505753	440889088	37.3485	38.1	52.47	130755	85940	44814	73.9399	121.29	95403.4	88114.1	0.25	289.82	0.0299829	17838.1	970352	250870	164887	85981.4	48	29	28	57	301991	48.0316	6.07836	1.5659	2.96989	11.1504	0.774265	10.7655	-0.390574
2007-05-01	11262450	11439.8	514647	446454109	36.4957	37.23	51.66	136786	87319	49466	74.0655	122.31	96364.2	88884.8	0.28	290.631	0.031835	21887.5	984660	261709	167065	94641.9	52	21	32	69	212217	46.9809	5.8045	0.84096	2.98027	10.5647	1.00709	10.1485	0.874661
2007-06-01	9597679	9748.84	525046	452495224	35.9958	36.72	51.06	131481	85840	45641	74.7853	123.4	97321.2	89848.3	0.28	291.445	0.0369016	18600.1	1.00175e+06	250856	163777	87079.8	50	34	32	62	181667	45.684	7.55687	0.891178	2.69651	9.17584	0.993107	8.98206	1.08399
2007-07-01	10010252	10167.9	541348	462194625	35.1919	35.9	50.61	139433	91588	47845	73.9929	124.26	98100.3	91151.8	0.24	292.144	0.0374191	19353.2	1.03038e+06	265391	174325	91066.3	48	34	36	68	126992	45.1776	6.2778	0.696921	2.94524	8.63929	0.800545	8.31894	1.45078
2007-08-01	10506154	10671.6	559351	474134511	35.0155	35.72	49.89	141760	92375	49384	74.3703	124.29	98742.3	91745.6	0.47	293.517	0.0417741	20216.9	1.05967e+06	268558	175001	93555.9	49	24	31	65	133329	43.8796	6.5952	0.0241429	3.00189	8.75409	0.654432	8.70911	0.651441
2007-09-01	9100858	9244.19	571372	483626841	34.7998	35.5	49.43	127292	83129	44163	75.5567	125.36	100628	93459.4	0.18	294.046	0.0414622	17481.3	1.0805e+06	240716	157201	83514.6	50	16	29	66	251168	43.481	7.28284	0.86089	3.46171	8.49904	1.91002	8.23399	1.86799
2007-10-01	10778853	10948.6	586902	494011072	34.7214	35.42	48.88	147406	96248	51158	75.9479	126.19	100932	93712.3	0.3	294.928	0.0411508	20642.5	1.10654e+06	277919	181466	96453.2	46	21	29	73	205260	42.9956	6.95881	0.662093	3.66679	8.94988	0.301307	8.64476	0.270599
2007-11-01	10699740	10868.3	607215	510624877	34.0548	34.74	46.75	144426	94502	49925	77.37	126.17	102698	95099.8	0.38	296.049	0.0418774	20413.4	1.14051e+06	271270	177499	93772.1	48	33	25	69	124554	40.8515	6.14116	-0.0158491	3.70744	8.57832	1.7497	8.01542	1.4806
2007-12-01	10238632	10399.9	627514	523727373	33.1628	33.83	45.8	149524	100311	49213	77.9674	126.96	108915	100244	0.74	298.239	0.0445733	19390.2	1.16998e+06	278782	187026	91755.8	36	30	20	65	-319414	39.5785	5.80882	0.626139	3.71069	11.4228	6.0538	11.9238	5.40926
2008-01-01	10741919	10911.1	637031	533192423	36.5349	37.27	53.08	145339	95374	49965	77.3923	127.18	110894	101966	0.54	299.85	0.0456133	20234.1	1.18134e+06	269524	176866	92657.5	44	31	30	86	142921	46.4021	6.27559	0.173283	3.45889	12.3101	1.81739	12.2982	1.71791
2008-02-01	10209500	10370.3	650206	541753863	36.6427	37.38	52.59	133921	86600	47321	78.0262	126.83	110936	102238	0.49	301.319	0.0461338	19137.4	1.19989e+06	247139	159812	87326.5	43	25	30	77	204963	45.8609	5.52459	-0.275201	3.22734	12.8425	0.0375133	12.8983	0.266167
2008-03-01	12253961	12447	675746	558876097	36.8878	37.63	50.48	148365	97544	50821	78.3716	126.48	105010	97158.9	0.48	302.765	0.0472803	22860	1.24107e+06	272486	179148	93337.4	42	19	31	81	206556	43.6865	5.91191	-0.27596	2.55092	10.9218	-5.34139	9.83421	-4.96745
2008-04-01	11597759	11780.4	694533	570788117	36.6918	37.43	50.6	149626	97173	52453	79.398	127.79	106190	97621.8	0.55	304.431	0.0504143	21517.5	1.2686e+06	273299	177491	95807.8	49	42	32	72	294522	43.372	5.35906	1.03574	2.09169	11.3068	1.12408	10.7902	0.476436
2008-05-01	10912100	11084	714469	585362795	36.8486	37.59	48.39	147429	97386	50043	79.1124	129.44	108434	99652.5	0.79	306.836	0.0557565	20086.7	1.29478e+06	267175	176486	90689.3	47	34	25	71	202984	40.5532	5.82945	1.29118	2.00221	12.5248	2.11234	12.1142	2.08017
2008-06-01	10486805	10652	730738	597426046	37.2799	38.03	51.39	151144	100790	50354	79.8264	131.11	110567	101805	0.74	309.106	0.0605994	19162	1.31454e+06	271895	181313	90582.6	51	55	31	69	309442	42.74	6.24797	1.29017	2.07108	13.6103	1.96738	13.308	2.16031
2008-07-01	11046848	11220.8	747211	605029042	38.6229	39.4	53.59	155913	103253	52659	79.7623	130.91	112386	104137	0.53	310.744	0.0636678	20078.9	1.33708e+06	278996	184764	94229.7	48	33	28	75	203218	44.3966	5.35168	-0.152544	2.1702	14.5619	1.64489	14.2461	2.29075
2008-08-01	9641760	9793.61	765976	617752277	39.3385	40.13	54.49	147370	97944	49427	82.0139	131.02	114636	106464	0.28	311.615	0.0616563	17476.1	1.36684e+06	262972	174775	88199.3	44	31	30	64	239123	45.5179	5.41476	0.0840272	2.38042	16.0965	2.00275	16.0421	2.23368
2008-09-01	10268843	10430.6	794301	639031340	39.5738	40.37	56.31	162011	110040	51970	83.3549	130.84	116631	108245	0.26	312.425	0.0625041	18564.4	1.4137e+06	288349	195850	92496.6	46	34	26	73	282841	47.1147	4.37141	-0.137384	2.80333	15.9027	1.73985	15.8203	1.67334
2008-10-01	9185386	9330.05	814746	660236944	42.0833	42.93	57.42	156782	106778	50004	82.8945	128.12	116429	108058	0.45	313.831	0.0640931	16531.3	1.4436e+06	277792	189193	88598.8	48	31	25	67	61401	47.9382	1.52944	-2.07887	2.63065	15.3542	-0.173367	15.3078	-0.173126
2008-11-01	8484158	8617.78	825652	671620603	43.1812	44.05	59.88	142181	96055	46126	83.2889	124.93	118219	109271	0.36	314.96	0.063881	15214.5	1.45767e+06	251018	169583	81434.5	45	38	22	63	-40821	50.28	-0.982801	-2.48985	1.60198	15.1138	1.53768	14.9013	1.12283
2008-12-01	8010831	8137	833190	669086673	42.4264	43.28	60.44	162023	112130	49893	83.6844	120.94	123944	113971	0.28	315.842	0.0590231	14325.6	1.46687e+06	285250	197410	87839.1	36	17	21	61	-654946	51.4981	-4.74165	-3.19379	-0.26924	13.7997	4.84313	13.6933	4.30105
2009-01-01	8806260	8944.96	828359	664033110	41.5637	42.4	56.51	133565	84446	49119	84.028	120.8	126320	115813	0.48	317.358	0.0583911	15672.8	1.4514e+06	234025	147961	86063.3	36	32	26	90	-101748	47.8754	-5.01651	-0.11576	-2.05939	13.9109	1.91683	13.5796	1.6162
2009-02-01	8847599	8986.95	826524	666894339	40.5148	41.33	54.49	123270	78332	44939	83.0614	122.21	125170	115450	0.55	319.104	0.0590231	15660.3	1.44026e+06	214805	136498	78308.7	40	31	24	86	9179	45.8797	-3.64267	1.16722	-3.72192	12.8311	-0.910701	12.9237	-0.312833
2009-03-01	11223918	11400.7	834475	673876189	38.4268	39.2	50.84	155470	100893	54577	83.0899	123	119411	110665	0.2	319.742	0.056072	19826.7	1.45122e+06	270374	175461	94913.6	44	29	26	88	34818	42.8312	-2.75142	0.646428	-5.26302	13.7139	-4.60079	13.9008	-4.14516
2009-04-01	12445226	12641.2	838679	675957060	37.8093	38.57	48.78	143006	89601	53405	82.4937	123.68	119573	110556	0.48	321.277	0.0553368	21879.1	1.45156e+06	247510	155079	92431.8	42	22	26	96	106205	40.9787	-3.21621	0.552846	-5.87121	12.6023	0.135498	13.2492	-0.0984053
2009-05-01	11614552	11797.5	847745	677520206	37.1231	37.87	46.62	140025	87260	52765	81.9235	124.88	120859	111388	0.47	322.787	0.0519862	20323.2	1.46039e+06	241217	150320	90896.8	42	33	22	84	131557	39.3745	-3.52287	0.970246	-5.33124	11.4586	1.07524	11.7768	0.753013
2009-06-01	12139006	12330.2	854231	682072746	35.9173	36.64	45.64	152294	96292	56002	82.359	125.89	122732	113235	0.36	323.949	0.048018	21164.7	1.46628e+06	261412	165285	96127.1	39	18	20	83	119495	38.9671	-3.98139	0.808776	-3.43002	11.0026	1.55016	11.227	1.6578
2009-07-01	12119756	12310.6	852380	680994212	35.2409	35.95	44.78	152149	94739	57410	83.1649	126.25	124171	115363	0.24	324.726	0.0449947	21080.5	1.4596e+06	260538	162230	98308	39	37	22	80	138402	38.5462	-3.5597	0.285964	-1.41941	10.4866	1.17239	10.7795	1.87919
2009-08-01	11690195	11874.3	861333	690638459	34.7214	35.42	44.29	149123	93213	55909	84.6022	128.06	126214	117378	0.15	325.213	0.04364	20302.9	1.47272e+06	254973	159377	95594.3	37	23	21	85	242126	38.2565	-2.2592	1.43366	0.524176	10.0994	1.64531	10.2516	1.74649
2009-09-01	11042727	11216.6	870856	698592222	34.5548	35.25	44.71	153539	97502	56038	85.3763	129.14	127771	119102	0.24	325.994	0.0434319	19132.5	1.48544e+06	261895	166312	95585.4	40	30	21	86	252617	38.6866	-1.2993	0.843355	2.41892	9.55184	1.23386	10.0304	1.46936
2009-10-01	11464284	11644.8	879979	707994199	34.9077	35.61	45.74	154128	96176	57953	85.5858	129.85	127533	118824	0.28	326.907	0.041666	19807.4	1.49681e+06	262166	163592	98575.9	38	21	19	80	230956	39.9105	1.3503	0.549791	3.87596	9.5376	-0.186349	9.96357	-0.233748
2009-11-01	11190941	11367.2	892321	717589734	34.2019	34.89	43.64	154157	97849	56308	85.9697	129.99	129056	119874	0.41	328.247	0.0421849	19256.2	1.51161e+06	261145	165758	95386.7	40	22	20	83	246695	37.8258	4.05027	0.107817	4.57778	9.16705	1.1942	9.70368	0.883828
2009-12-01	10888801	11060.3	902959	721552079	33.6039	34.28	44.35	165015	105376	59639	85.8144	131.33	134135	123609	0.37	329.462	0.0431203	18667.3	1.52399e+06	278508	177851	100657	34	25	16	76	-415192	38.3829	8.59104	1.03085	4.61335	8.22207	3.93557	8.45673	3.11552
2010-01-01	10985710	11158.7	904156	726711945	34.4469	35.14	44.83	138702	83448	55254	85.8831	133.47	135814	124710	0.75	331.933	0.0459233	18693.2	1.51465e+06	232355	139793	92562	32	21	18	100	181419	38.471	10.4884	1.62948	4.81694	7.51574	1.25165	7.68292	0.891198
2010-02-01	11422636	11602.5	912036	738234397	33.7117	34.39	43.81	140600	85143	55458	87.0152	135.2	135858	125269	0.78	334.522	0.0483157	19286.2	1.51603e+06	233711	141528	92184.7	35	21	19	95	209425	37.182	10.6292	1.29617	4.95105	8.53919	0.0325445	8.50478	0.447998
2010-03-01	15131146	15369.5	922991	747978849	33.5451	34.22	42.69	174907	105117	69790	87.5019	136.52	132706	122963	0.52	336.261	0.0516636	25415.6	1.5263e+06	289234	173826	115408	37	26	19	95	266415	35.6803	10.9919	0.976331	5.07455	11.1341	-2.32006	11.1132	-1.84084
2010-04-01	13177861	13385.4	931127	758529692	33.6333	34.31	42.87	159638	96173	63465	87.9995	137.2	134362	123914	0.57	338.178	0.0526056	22009.2	1.53103e+06	262488	158135	104354	39	27	23	93	305068	35.7298	10.9314	0.498096	5.18801	12.3686	1.24787	12.0823	0.772914
2010-05-01	13964510	14184.4	946955	775409393	34.1822	34.87	43.04	167754	102291	65463	87.4683	136.46	135379	124436	0.43	339.632	0.0521865	23223.2	1.55038e+06	274652	167474	107178	39	18	22	92	298041	35.9455	9.2729	-0.539359	5.33035	12.0141	0.756387	11.7132	0.421181
2010-06-01	13633308	13848	961569	792859899	33.9274	34.61	41.97	171837	106720	65117	87.9343	136.2	136531	125586	0	339.632	0.0484123	22672.4	1.57431e+06	281337	174725	106612	38	32	20	81	212952	35.4143	8.18969	-0.190532	5.21933	11.243	0.851094	10.9078	0.924977
2010-07-01	13770220	13987.1	969380	801631504	34.7018	35.4	42.21	165931	99028	66903	90.5569	136.9	138725	128682	0.01	339.666	0.0460067	22897.8	1.58694e+06	271640	162116	109525	34	21	17	86	181796	35.9552	8.43564	0.51395	4.68638	11.7208	1.60689	11.5457	2.46507
2010-08-01	15100869	15338.7	982429	814782168	34.5155	35.21	41.96	172371	102260	70110	92.1542	137.69	142325	132223	0.04	339.802	0.0448578	25100.5	1.60766e+06	282070	167340	114729	40	28	20	87	299415	35.8654	7.51991	0.577064	4.0546	12.7646	2.59499	12.6478	2.75182
2010-09-01	14156905	14379.9	1002374	835653877	34.3881	35.08	41.63	173733	104731	69001	94.096	139.31	145208	135000	0.45	341.331	0.0470467	23426	1.63295e+06	283025	170615	112408	39	23	18	81	246875	35.2662	7.87517	1.17656	3.44065	13.6468	2.02586	13.3474	2.09955
2010-10-01	12986435	13191	1018637	852456174	34.6528	35.35	43.55	169974	101198	68776	94.8797	138.81	145783	135539	0.75	343.891	0.0519541	21329.2	1.64709e+06	274840	163633	111208	37	24	18	79	204804	36.4603	6.90027	-0.358912	2.695	14.31	0.396121	14.0672	0.399779
2010-11-01	14396206	14622.9	1039882	872211043	34.1136	34.8	41.99	181375	108441	72933	94.297	140.06	146966	136020	0.83	346.745	0.0563543	23450	1.6676e+06	290861	173901	116959	39	29	20	83	138247	34.4151	7.74675	0.900511	2.31924	13.8775	0.811342	13.4692	0.354953
2010-12-01	13798916	14016.2	1055664	880079044	34.3489	35.04	44.11	188898	117202	71696	93.8747	138.34	152740	140506	0.63	348.93	0.0590907	22336.4	1.68231e+06	301029	186774	114255	34	42	16	82	-407510	36.0696	5.3377	-1.22805	1.97043	13.87	3.92873	13.6694	3.29745
2011-01-01	12386649	12581.7	1056671	890133108	36.6623	37.4	48.32	159971	94902	65070	93.1644	140.11	154334	141291	0.83	351.826	0.0599316	19885.3	1.67006e+06	252832	149991	102842	33	29	20	89	152091	39.9336	4.9749	1.27946	1.93529	13.6361	1.0436	13.2953	0.559124
2011-02-01	14108851	14331.1	1071299	908022650	37.3191	38.07	47.96	165007	97679	67328	92.7	140.65	154836	142458	0.8	354.64	0.060142	22470.3	1.67974e+06	258722	153155	105567	34	24	22	87	280799	39.5662	4.03107	0.385411	1.98667	13.969	0.325593	13.7216	0.826025
2011-03-01	14865867	15100	1085142	919429752	38.27	39.04	42.86	175059	109581	65478	93.4566	141.15	148694	137050	0.79	357.442	0.0629896	23490.4	1.68811e+06	272331	170470	101861	35	37	20	81	92675	34.3945	3.39144	0.355492	1.86462	12.0473	-3.96709	11.4559	-3.79655
2011-04-01	13747806	14025	1102014	936086634	39.07	39.84	44.18	166179	103576	62603	91.8184	140.97	151734	139275	0.77	360.194	0.0651035	21651.3	1.70125e+06	256542	159897	96644.5	37	32	21	78	272225	35.3671	2.74781	-0.127524	1.92762	12.9285	2.0442	12.3969	1.62372
2011-05-01	15585360	16170	1118688	952286968	38.76	39.98	44.37	181787	113790	67997	93.3274	141.22	153075	140112	0.47	361.887	0.0655277	24845.9	1.71891e+06	279324	174843	104480	39	27	19	77	252067	35.4915	3.4882	0.177343	1.62491	13.072	0.88438	12.5977	0.60061
2011-06-01	15717815	16203	1135092	969231372	38.64	39.48	44.31	180782	114214	66568	93.4748	142.15	156488	143607	0.15	362.43	0.067126	24859.4	1.74151e+06	277364	175232	102132	37	37	18	72	215393	35.2324	4.36858	0.658547	1.82166	14.6176	2.22962	14.3494	2.49508
2011-07-01	15137076	15527	1143774	979457629	39.02	39.65	44.79	172450	108233	64217	96.0018	142.22	157842	146118	0.16	363.01	0.0687265	23784.2	1.75203e+06	264158	165791	98367.2	34	27	17	74	140563	35.479	3.88605	0.0492438	1.68281	13.7804	0.864793	13.549	1.74789
2011-08-01	16797790	17232	1159377	995907888	38.05	39.67	44.28	191969	122466	69503	97.3332	141.9	159838	148275	0.37	364.353	0.0722519	26298.6	1.76938e+06	292973	186901	106072	36	47	18	77	190446	34.5579	3.05759	-0.225004	1.47263	12.3049	1.26449	12.1397	1.47648
2011-09-01	15165410	16214	1181379	1019153747	38.33	38.96	44.38	181259	112944	68315	95.4613	141.79	161388	149805	0.53	366.284	0.0731059	24614.5	1.79345e+06	275169	171460	103709	36	29	15	73	209078	34.544	1.7802	-0.0775194	1.32639	11.1426	0.969985	10.9671	1.03193
2011-10-01	13765241	14668	1189585	1028050800	38.75	39.53	45.06	174023	106893	67130	95.7625	141.72	160067	148530	0.43	367.859	0.0696975	22172.2	1.79818e+06	263053	161580	101474	37	39	17	72	126143	35.6084	2.09639	-0.0493688	1.15538	9.79784	-0.818648	9.58461	-0.85104
2011-11-01	15539770	17107	1208000	1045612770	37.92	38.47	43.39	185643	115997	69646	96.3818	142.23	162963	150694	0.52	369.772	0.0664087	25725.2	1.81657e+06	279166	174434	104732	37	30	16	74	42735	34.4606	1.54934	0.359865	1.13599	10.8846	1.80918	10.7877	1.45674
2011-12-01	14146538	15100	1231006	1060444210	35.88	37.05	42.36	198456	130914	67542	97.0474	140.45	170138	156575	0.5	371.621	0.0650311	22594.1	1.84195e+06	296950	195887	101063	31	27	14	65	-408172	33.6675	1.52523	-1.25149	0.479764	11.3907	4.40309	11.4366	3.90248
2012-01-01	14602051	15390	1227640	1064169687	37.13	38	44.8	169154	103412	65742	96.4802	138.83	173207	158674	0.56	373.702	0.0621792	22899.8	1.82669e+06	251696	153874	97821.9	32	33	17	84	118895	36.3235	-0.913568	-1.15344	-0.169739	12.2288	1.80383	12.3027	1.34064
2012-02-01	14354945	15167	1234897	1071105933	37.56	38.13	45.22	161666	97893	63773	98.0932	140.47	175741	161952	0.45	375.384	0.0584911	22466.9	1.82925e+06	239476	145009	94467	33	31	17	79	150600	37.1953	-0.127977	1.1813	-0.484928	13.5012	1.46299	13.6835	2.06575
2012-03-01	16114888	16722	1258473	1090024719	37.07	37.28	43.86	192287	123542	68745	100	139.98	167828	154907	0.21	376.172	0.0523999	24718.4	1.86027e+06	284238	182619	101619	34	29	20	77	111746	36.6971	-0.828905	-0.348829	-0.772714	12.8679	-4.50287	13.0299	-4.34964
2012-04-01	16086200	17044	1274265	1107541194	36.03	35.07	41.4	183804	116294	67510	101.141	141.15	169819	156190	0.64	378.579	0.0510423	25034.2	1.87164e+06	269971	170812	99158.4	36	39	24	91	216974	34.5331	0.127687	0.835834	-0.927145	11.9194	1.18663	12.1452	0.828238
2012-05-01	18540445	20211	1294203	1124213358	33.84	32.86	39.3	200252	127765	72487	101.201	142.6	171100	156851	0.36	379.942	0.0498915	29579.4	1.8941e+06	293074	186988	106087	35	30	21	92	139679	32.6804	0.977199	1.02728	-1.00116	11.775	0.754214	11.9476	0.42333
2012-06-01	16694592	18754	1315661	1144670131	32.93	31.06	38.24	195940	124986	70954	101.269	143.54	173329	159285	0.08	380.246	0.0491577	27425.1	1.92397e+06	286534	182774	103760	35	30	21	83	120440	31.7628	0.97784	0.659187	-0.43984	10.7615	1.30269	10.917	1.55153
2012-07-01	16132884	17512	1320806	1150265168	32.29	30.65	38.59	188318	118542	69776	101.893	143.92	173920	161119	0.43	381.881	0.0519859	25499.2	1.92322e+06	274209	172609	101601	33	35	18	78	142496	31.7413	1.19533	0.264735	0.559675	10.1867	0.341316	10.267	1.15165
2012-08-01	17036918	18805	1332464	1162818885	31.66	30.07	38.03	195611	123034	72577	102.514	144.32	175711	163131	0.41	383.447	0.0524051	27270.1	1.93227e+06	283665	178418	105248	36	28	18	75	100938	31.1567	1.70543	0.277932	1.18511	9.93077	1.02932	10.0194	1.24858
2012-09-01	13470584	14812	1344794	1172915666	31.44	29.93	37.76	176227	113123	63104	102.555	143.7	178286	165625	0.57	385.633	0.0528239	21357.9	1.9391e+06	254107	163116	90991.7	34	30	16	73	150334	30.8481	1.34706	-0.429601	1.84312	10.4703	1.46553	10.5607	1.52902
2012-10-01	16991111	18468	1355892	1183115575	30.74	29.35	37.81	200960	127947	73013	102.248	144.96	178951	166338	0.59	387.908	0.0545012	26473.4	1.94364e+06	288071	183409	104662	33	27	18	76	66988	30.6874	2.2862	0.876827	2.36387	11.7979	0.373333	11.9892	0.430067
2012-11-01	15673619	16887	1370604	1193645170	30.58	28.92	37.12	191044	121554	69490	102.605	144.58	182173	168673	0.6	390.235	0.0553404	24062.7	1.95301e+06	272223	173205	99018	36	28	18	73	46095	29.9296	1.65225	-0.262141	2.55371	11.7884	1.80049	11.9309	1.40395
2012-12-01	14177166	15093	1396241	1205701546	29.17	28.08	36.89	197710	130346	67364	102.603	144.18	189032	174333	0.79	393.318	0.0583857	21337.8	1.97394e+06	279514	184277	95236.3	29	28	14	62	-496944	29.3385	2.65575	-0.276663	2.25498	11.1049	3.76476	11.342	3.35578
2013-01-01		18551	1385371		29.87		37.38	181513	109799	71714	102.363	144.92	191442	175802	0.86	396.701	0.0615432	26003	1.94188e+06	254427	153905	100522	31	26	21	84	28900	29.4154	4.38666	0.513247	1.76127	10.5281	1.27529	10.795	0.842754
2013-02-01		17941	1388503		30.6		37.96	173519	105143	68376	103.076	143.84	189517	174881	0.6	399.081	0.0631283	24997.9	1.93466e+06	241771	146500	95271.1	32	35	19	76	123446	29.768	2.39909	-0.745239	1.24721	7.83852	-1.00599	7.98356	-0.524168
2013-03-01		19409	1407417		30.14		37.25	190065	118557	71508	103.358	144.95	183635	170033	0.47	400.957	0.0658867	26916.9	1.95184e+06	263587	164418	99169	33	26	20	77	112450	28.766	3.55051	0.771691	0.954343	9.41901	-3.10326	9.7643	-2.77229
2013-04-01		21272	1411352		30.24		36.9	200744	122985	77759	104.165	146.19	187057	172526	0.55	403.162	0.0649335	29339.1	1.94659e+06	276874	169626	107248	35	36	24	81	196913	28.5526	3.57067	0.855467	0.651187	10.1507	1.86331	10.4592	1.4666
2013-05-01		21290	1427448		29.99		36.78	210997	133771	77226	105.285	146.87	190250	175004	0.37	404.654	0.0650396	29255.7	1.96153e+06	289942	183822	106120	35	26	20	78	72028	28.4271	2.99439	0.465148	0.685533	11.1923	1.70691	11.5731	1.43601
2013-06-01		19715	1441075		30.43		38.07	198073	125314	72759	106.35	146.29	193404	177983	0.26	405.706	0.0669551	27021.2	1.97512e+06	271477	171754	99722.7	35	33	21	72	123836	29.4056	1.91584	-0.394907	0.854839	11.582	1.65777	11.7385	1.70202
2013-07-01		20031	1440430		31.22		39.8	196232	119561	76671	107.45	146.96	192994	179096	0.03	405.827	0.0627056	27446.1	1.97365e+06	268873	163820	105053	35	30	21	79	41463	31.551	2.11228	0.457994	0.973854	10.9669	-0.211836	11.1575	0.625735
2013-08-01		21179	1447717		31.75		39.77	198009	119762	78247	107.912	147.12	194453	180887	0.24	406.801	0.0609064	28949.5	1.97888e+06	270658	163702	106956	36	37	19	76	127648	31.7458	1.94013	0.108873	1.40848	10.6664	0.755722	10.8844	0.999853
2013-09-01		18527	1460987		32.04		40.41	199564	124345	75219	108.027	148.13	197395	183901	0.35	408.225	0.0585856	25236.2	1.99006e+06	271832	169374	102458	36	39	20	77	211068	32.6392	3.08281	0.686514	1.62895	10.7185	1.51332	11.0342	1.66618
2013-10-01		19669	1462303		32.66		42.29	207771	128255	79516	108.169	148.21	198902	185417	0.57	410.552	0.0583751	26639.9	1.98056e+06	281407	173710	107697	38	37	19	75	94893	34.4419	2.242	0.0540066	1.71759	11.1487	0.763341	11.4703	0.82452
2013-11-01		18107	1479882		33.14		41.78	200534	124309	76225	108.489	148.36	201875	187411	0.54	412.769	0.0577439	24392.6	1.9936e+06	270147	167461	102685	36	37	17	73	47486	34.04	2.61447	0.101208	1.62122	10.8148	1.49465	11.109	1.07525
2013-12-01		17414	1505569		32.68		41.37	221166	143223	77943	107.891	148.74	208339	192487	0.92	416.567	0.0591082	23245.2	2.00972e+06	295225	191182	104043	32	31	16	67	-449444	33.4802	3.16271	0.256134	1.65624	10.2138	3.20203	10.4132	2.70849
2014-01-01		19085	1488825		34.29		43.04	189175	110936	78239	107.304	148.27	210892	193957	0.55	418.858	0.0558529	25336.4	1.9765e+06	251140	147274	103866	34	33	20	88	29595	35.4734	2.31162	-0.315988	1.56896	10.1596	1.22545	10.3269	0.763948
2014-02-01		22109	1489636		35.65		44.2	194915	113868	81047	108.668	147.86	210780	194900	0.69	421.748	0.0567975	29149.8	1.96402e+06	256987	150130	106857	38	31	22	81	260823	36.45	2.79477	-0.276523	1.27394	11.2201	-0.0530128	11.4472	0.485931
2014-03-01		18778	1500164		35.82		43.95	201792	123928	77864	109.532	147.84	205097	190236	0.92	425.628	0.0615309	24532.3	1.95987e+06	263629	161904	101724	37	36	24	81	13117	35.606	1.99379	-0.0135263	0.87572	11.6872	-2.69626	11.8818	-2.39307
2014-04-01		19941	1501489		35.73		45.29	202341	122747	79594	110.136	146.97	206880	191208	0.67	428.48	0.0627978	25878.3	1.94855e+06	262586	159294	103293	37	34	24	78	105384	36.7052	0.533552	-0.588474	0.504765	10.5973	0.869246	10.828	0.510892
2014-05-01		20526	1511593		36.01		45	206483	125790	80693	110.202	146.22	206408	190060	0.46	430.451	0.0637507	26515.5	1.95268e+06	266735	162496	104239	38	34	22	79	58836	36.3101	-0.442568	-0.510308	0.0937779	8.49309	-0.228151	8.603	-0.600447
2014-06-01		19994	1522571		36.24		45.67	206553	127640	78913	108.643	143.56	206135	189676	0.4	432.172	0.0652361	25725.4	1.95902e+06	265762	164228	101534	36	30	19	68	25363	36.749	-1.86616	-1.81918	-0.76618	6.5826	-0.132359	6.5698	-0.201989
2014-07-01		19774	1515198		36.46		45.93	195304	115670	79634	107.237	144.64	207622	192652	0.01	432.216	0.0650231	25439.7	1.94934e+06	251263	148812	102451	36	31	21	78	11796	37.0205	-1.57866	0.752299	-1.32084	7.57961	0.721615	7.56917	1.56936
2014-08-01		18250	1521363		36.55		45.52	191151	115060	76091	107.499	145.67	212480	197870	0.25	433.296	0.0651294	23420.5	1.95239e+06	245307	147658	97648.8	38	37	22	77	101425	36.6219	-0.98559	0.712113	-1.64911	9.27074	2.33958	9.3889	2.70845
2014-09-01		19094	1532310		36.1		44.49	206884	127595	79289	108.965	146.11	217982	203465	0.57	435.766	0.0674645	24364.8	1.95529e+06	263993	162817	101176	40	32	21	79	123785	35.3581	-1.36367	0.302053	-1.81158	10.4292	2.58956	10.6384	2.82751
2014-10-01		24718	1536735		37.3		46.08	208284	122511	85773	110.022	145.58	218587	204091	0.42	437.596	0.0658724	31409.3	1.95274e+06	264668	155675	108992	39	32	21	77	-30283	37.0521	-1.77451	-0.36274	-1.831	9.89692	0.277637	10.0712	0.307571
2014-11-01		20558	1550446		37.6		46.01	197292	118718	78574	109.889	145.65	223322	207530	0.51	439.828	0.0655543	25990.6	1.96016e+06	249428	150090	99337.8	42	38	23	78	8381	37.0273	-1.82664	0.0480835	-1.6582	10.6238	2.16595	10.7352	1.68498
2014-12-01		19273	1576287		36.84		45.41	226491	145520	80971	110.517	146.23	231657	214444	0.78	443.259	0.0640762	24177.5	1.97741e+06	284127	182551	101576	37	34	21	68	-555508	36.6538	-1.68751	0.398215	-0.776637	11.192	3.73215	11.4069	3.33152
2015-01-01		18674	1564503		38.81		47.1	187204	109945	77259	110.893	145.24	233228	214833	1.24	448.755	0.0713781	23139.1	1.93859e+06	231966	136234	95732.3	40	45	27	95	-81774	37.2998	-2.04357	-0.677016	-0.297575	10.5911	0.678375	10.7632	0.181726
2015-02-01		17584	1564684		40.29		47.47	172958	100002	72956	111.092	144.3	230728	213590	1.22	454.23	0.0770175	21525.9	1.91544e+06	211731	122420	89310.8	40	41	28	83	-2415	36.9244	-2.40768	-0.647205	-0.204595	9.46387	-1.07174	9.58938	-0.57896
2015-03-01		21033	1578749		40.49		46.53	214731	131371	83360	110.503	144	224018	207912	1.32	460.226	0.0812863	25412.6	1.90748e+06	259443	158726	100718	44	40	28	89	19282	35.5145	-2.5974	-0.2079	-0.24852	9.22538	-2.90827	9.29173	-2.65818
2015-04-01		18962	1575586		41.45		48.85	197913	119368	78545	110.748	142.41	225497	208358	0.71	463.493	0.081716	22748.8	1.89024e+06	237438	143207	94231	44	46	31	92	-97828	37.6054	-3.10267	-1.10417	-0.453096	8.99888	0.66008	8.9693	0.21437
2015-05-01		18600	1584384		42.36		48.82	195554	119084	76470	110.061	141.16	228679	210645	0.74	466.923	0.0847309	22150.6	1.88683e+06	232884	141816	91067.7	44	41	26	84	-115599	37.1953	-3.46054	-0.877747	-0.903341	10.7896	1.41097	10.8312	1.09792
2015-06-01		19041	1596084		43.19		49.05	208790	130552	78238	110.459	139.85	230201	212096	0.79	470.612	0.0889445	22498.1	1.88587e+06	246698	154255	92442.9	46	40	29	73	-111199	36.8757	-2.58429	-0.928025	-1.93619	11.6749	0.665694	11.8204	0.688741
2015-07-01		18211	1594184		44.14		49.95	193973	117262	76711	109.744	138.83	230472	214243	0.62	473.53	0.0955864	21384.8	1.87202e+06	227779	137698	90080.2	46	46	30	79	-157905	36.8673	-4.01687	-0.729353	-2.73648	11.0055	0.117854	11.2072	1.01242
2015-08-01		17887	1601273		45.13		50.94	186213	111441	74772	109.084	139.09	230400	214617	0.22	474.571	0.0952585	20958.2	1.87621e+06	218186	130576	87610.5	44	40	31	77	-86543	37.8122	-4.51706	0.187279	-3.18058	8.4336	-0.0315439	8.46327	0.174194
2015-09-01		18136	1610315		46.22		50.21	197295	122296	74999	108.91	137.98	231137	215534	0.54	477.134	0.0949318	21135.9	1.87668e+06	229929	142525	87404.5	47	47	32	73	-95602	37.1866	-5.5643	-0.798044	-3.6372	6.03499	0.320226	5.93148	0.427274
2015-10-01		14696	1602647		47.53		53.33	186996	114788	72208	108.395	138.95	236020	220530	0.82	481.047	0.0992932	16987.5	1.85255e+06	216154	132687	83467.4	45	39	30	68	-169131	39.4805	-4.5542	0.703	-3.6839	7.97507	2.11238	8.05504	2.31839
2015-11-01		16819	1614464		48.13		51.39	190654	115978	74676	107.57	136.94	247172	231580	1.01	485.905	0.104762	19247.2	1.84755e+06	218179	132722	85457.1	46	40	30	74	-130629	37.0341	-5.98009	-1.44656	-3.67179	10.6795	4.7249	11.5887	5.01037
2015-12-01		16270	1637145		46.89		50.79	214880	141470	73410	107.026	136.39	267499	250238	0.96	490.57	0.106735	18441.9	1.85569e+06	243564	160355	83209.5	41	38	26	66	-596208	36.2476	-6.72913	-0.401636	-3.35838	15.4724	8.22416	16.6915	8.05666
2016-01-01		15119	1614493		49.44		51.31	163214	95249	67965	106.597	135.68	265387	247173	1.27	496.8	0.107063	16922.3	1.80706e+06	182681	106610	76071.6	40	35	33	78	-99694	36.677	-6.58221	-0.520566	-3.00041	13.7885	-0.789796	15.0535	-1.22452
2016-02-01		16203	1602847		50.57		52.41	168897	97125	71772	106.019	135.62	261100	243247	0.9	501.271	0.103563	17973.9	1.77803e+06	187356	107740	79616.1	43	40	35	79	-104582	38.1072	-6.01525	-0.0442217	-2.81307	13.1635	-1.61508	13.8851	-1.5886
2016-03-01		17278	1591966		50.8		53.44	189987	115707	74280	106.242	134.62	242770	226286	0.43	503.427	0.0938693	19084.3	1.75839e+06	209849	127803	82045.4	43	50	37	79	-118776	40.2727	-6.51389	-0.737354	-2.51632	8.37048	-7.02059	8.83763	-6.97243
2016-04-01		16531	1576823		51.97		54.41	174374	103134	71240	105.825	134.49	245499	227707	0.61	506.498	0.0927831	18148.5	1.73111e+06	191436	113225	78210.5	45	46	37	76	-62844	41.2998	-5.56141	-0.0965681	-2.64638	8.87027	1.12432	9.28672	0.627877
2016-05-01		17284	1580332		51.9		54.24	183715	109369	74346	106.393	134.12	245662	227042	0.78	510.448	0.093217	18828.3	1.72153e+06	200130	119141	80988.7	43	44	32	74	-72615	41.0882	-4.98725	-0.275113	-2.49146	7.42649	0.0661102	7.78422	-0.291998
2016-06-01		18183	1568993		51.73		53.4	187038	112379	74659	105.259	134.59	248502	229782	0.35	512.235	0.0884446	19738.5	1.70322e+06	203039	121993	81046	44	39	34	69	-91032	40.9351	-3.76117	0.350432	-2.30143	7.94997	1.15623	8.33853	1.20656
2016-07-01		16667	1554097		52.36		53.8	162938	92575	70363	105.334	134.25	250642	233883	0.52	514.898	0.0873628	17999.3	1.67832e+06	175962	99974.9	75987.4	41	36	31	70	-94724	41.4431	-3.299	-0.252619	-2.10174	8.75138	0.86112	9.16714	1.785
2016-08-01		17970	1549534		52.83		53.7	174298	99120	75178	105.725	133.54	252161	235696	0.44	517.164	0.0897498	19321.4	1.66606e+06	187406	106574	80831.6	41	44	32	68	-33953	41.0416	-3.99022	-0.528864	-1.94143	9.4452	0.606244	9.82189	0.775002
2016-09-01		14248	1547413		53.26		54.18	176195	106933	69262	105.103	133.68	256014	239700	0.08	517.578	0.0847639	15307.2	1.66245e+06	189294	114883	74411.2	43	45	31	73	-39282	42.1323	-3.11639	0.104838	-1.65363	10.7627	1.52791	11.2121	1.69859
2016-10-01		16134	1543249		53.88		54.61	171011	98227	72784	104.982	133.38	257284	240934	0.26	518.923	0.0787386	17288.5	1.65368e+06	183248	105256	77992.2	44	47	33	73	-74748	43.3248	-4.00864	-0.224417	-1.25101	9.00924	0.495832	9.25223	0.515228
2016-11-01		16147	1548045		53.79		54.5	178275	104347	73928	105.367	133.18	268584	250891	0.18	519.858	0.0698746	17271.3	1.65584e+06	190689	111613	79075.7	47	47	33	72	-116747	44.4095	-2.74573	-0.149948	-1.02353	8.66293	4.3922	8.33872	4.13233
2016-12-01		15252	1556634		51.77		54.22	194403	122233	72170	106.403	132.29	286159	266534	0.3	521.417	0.0628806	16265.2	1.66005e+06	207318	130353	76964.4	42	40	31	62	-462366	45.0963	-3.00609	-0.668269	-1.0876	6.9756	6.54365	6.51257	6.23526
2017-01-01		17032	1533614		52.82		54.17	167194	93597	73597	106.339	133.59	287651	266848	0.38	523.399	0.0535395	18094.7	1.6293e+06	177626	99437	78189.1	44	39	40	85	-40864	46.3353	-1.54039	0.98269	-0.994193	8.38942	0.521388	7.95988	0.117658
2017-02-01		17099	1530906		53.04		54.14	148957	82915	66042	106.684	136.04	280318	261040	0.33	525.126	0.0475879	18106.2	1.62108e+06	157731	87798.8	69931.9	45	48	38	83	35612	47.138	0.309689	1.83397	-0.428247	7.36	-2.54948	7.31488	-2.17656
2017-03-01		19861	1535433		52.09		52.42	198558	115736	82822	106.91	135.66	261136	243459	0.25	526.439	0.0457103	20978.4	1.62182e+06	209729	122247	87481.6	47	58	40	79	-63624	45.7574	0.772545	-0.27933	-0.0658655	7.56524	-6.84285	7.58888	-6.73491
2017-04-01		17435	1525775		48.93		50.21	160581	89270	71311	107.23	135.36	262530	243058	0.14	527.176	0.0408253	18390.2	1.60936e+06	169378	94160.5	75217.7	48	47	52	74	59856	44.3182	0.646888	-0.221141	0.318582	6.93709	0.533784	6.74146	-0.164709
2017-05-01		22925	1522580		47.29		50.41	187306	101831	85475	107.431	134.93	265179	244729	0.31	528.81	0.0359713	24106.2	1.60103e+06	196957	107078	89879	48	51	50	72	34254	45.1874	0.603937	-0.317671	0.654108	7.94492	1.00918	7.79	0.687449
2017-06-01		21608	1531962		46.18		48.61	197103	116783	80320	107.836	135.92	268039	247278	-0.23	527.594	0.0299836	22773.7	1.61461e+06	207736	123083	84653.1	47	49	51	77	9821	44.2838	0.988186	0.733714	1.39694	7.86191	1.07844	7.61431	1.0416
2017-07-01		19204	1522137		46.61		50.57	167241	90361	76880	108.577	136.27	269325	250945	0.24	528.86	0.0271146	20191.6	1.60041e+06	175841	95007.8	80833.5	46	50	51	85	35900	46.5951	1.50466	0.257504	1.81577	7.45418	0.479856	7.29475	1.48274
2017-08-01		21060	1527126		45.55		49.41	186383	105772	80611	108.587	135.37	270272	252199	0.19	529.865	0.024558	22101	1.60261e+06	195596	111000	84595.7	48	48	58	80	35457	45.8287	1.37038	-0.660454	1.41493	7.18235	0.351731	7.00177	0.499831
2017-09-01		18780	1529595		43.3		48.46	178660	101924	76736	109.083	135.74	274768	256688	0.16	530.712	0.025377	19676.8	1.60264e+06	187192	106791	80400.5	49	63	57	79	34392	44.7858	1.54099	0.273325	1.17517	7.32553	1.66354	7.08721	1.77979
2017-10-01		20476	1537308		43.59		49.12	185320	103044	82276	109.413	136.03	276788	258665	0.42	532.941	0.0270134	21364.1	1.60398e+06	193358	107513	85844.5	50	53	58	74	76599	45.1977	1.9868	0.213644	1.00978	7.58113	0.735164	7.35901	0.770353
2017-11-01		20320	1553784		42.76		47.38	190037	106806	83231	110.013	136.13	286490	267314	0.28	534.434	0.0280385	21142.1	1.61665e+06	197726	111127	86598.4	54	56	61	79	-12292	43.3604	2.21505	0.0735132	0.939508	6.66674	3.50491	6.54616	3.3439
2017-12-01		19772	1584664		40.32		44.25	213288	134390	78898	110.002	137.81	304889	284207	0.44	536.785	0.0294735	20481.8	1.64155e+06	220945	139215	81730.5	50	58	57	74	-328539	40.1202	4.17265	1.23411	0.720887	6.54524	6.42229	6.6304	6.31926
2018-01-01		22684	1571363		41.08		46.16	184409	99553	84856	110.144	136.94	305046	283450	0.29	538.342	0.0285505	23430.4	1.62307e+06	190477	102829	87648.2	56	63	74	93	77822	42.1029	2.50767	-0.631304	0.47164	6.04722	0.051527	6.22133	-0.266426
2018-02-01		20123	1569398		42.17		46.92	182242	103904	78338	110.639	136.89	293373	273145	0.32	540.064	0.028448	20718.9	1.61587e+06	187638	106981	80657.7	56	62	73	81	61188	42.856	0.624816	-0.0365123	0.741232	4.65736	-3.82667	4.63734	-3.63532
2018-03-01		22615	1590542		41.46		46.75	204278	119241	85037	108.94	136.47	273711	254963	0.09	540.551	0.0268066	23263.7	1.63617e+06	210138	122661	87476.3	58	63	73	82	56151	42.9188	0.597081	-0.306816	0.821052	4.81543	-6.70215	4.72506	-6.65672
2018-04-01		23042	1601002		40.84		46.56	203153	118018	85135	109.93	137.3	274116	253378	0.22	541.74	0.0276268	23650.9	1.64331e+06	208522	121137	87384.8	63	73	76	90	115898	42.6199	1.43322	0.608192	0.894063	4.41352	0.148295	4.24586	-0.621542
2018-05-01		24954	1615649		39.11		44.21	198891	114194	84697	109.925	133.07	275136	254065	0.4	543.907	0.0285489	25511.4	1.65174e+06	203334	116745	86588.9	67	79	75	79	33659	40.2072	-1.37849	-3.08084	0.370343	3.75482	0.371959	3.815	0.271294
2018-06-01		24476	1640373		38.52		43.93	211136	126754	84382	110.334	137.3	276932	254804	1.26	550.76	0.0439096	24711.4	1.65615e+06	213166	127973	85193.4	65	76	77	72	-661	37.8759	1.0153	3.17878	0.0758549	3.31784	0.652732	3.0435	0.290713
2018-07-01		24571	1638532		38.06		44.55	199877	114286	85591	110.722	137.8	280092	260541	0.33	552.577	0.0448468	24725.7	1.64885e+06	201135	115005	86129.8	68	79	78	76	47319	38.3456	1.12277	0.364166	0.0990196	3.99792	1.14125	3.82423	2.25165
2018-08-01		26626	1664167		37.85		44.89	212835	124629	88206	111.326	138.42	282137	262229	-0.09	552.08	0.0419268	26817.8	1.67615e+06	214368	125527	88841.3	72	86	78	84	110431	39.0597	2.25308	0.449927	0.100056	4.38987	0.729937	3.9769	0.647613
2018-09-01		22610	1678731		37.92		45.02	197423	118134	79289	111.472	138.23	286502	267325	0.48	554.73	0.0452556	22664.1	1.68274e+06	197895	118416	79478.5	71	89	82	78	137336	38.7412	1.83439	-0.137263	0.225535	4.27032	1.54712	4.14426	1.94361
2018-10-01		27121	1682832		37.97		45.62	214782	124109	90673	111.552	138.1	287804	268535	0.45	557.226	0.0455679	27064	1.6793e+06	214331	123848	90482.6	71	91	87	71	57733	39.2736	1.52172	-0.0940462	0.167977	3.97961	0.454307	3.81563	0.45237
2018-11-01		24629	1714824		37.88		45.17	211047	121177	89870	111.743	138.47	298378	278163	-0.21	556.056	0.0404589	24629	1714824	211047	121177	89870	75	93	87	77	58664	39.525	1.71895	0.267922	1.20223	4.14978	3.67431	4.05844	3.58561
2018-12-01		24593					41.71					138.76			0.15	556.89	0.0374548	24556.2					72	88	80	77		36.5939	0.689355	0.209432	1.44382
2019-01-01		27536					43.8					138.19			0.32	558.672	0.0377652	27407.1					80	95	100	93		38.567	0.912809	-0.410781	1.3849
2019-02-01		26776					45.33								0.43	561.075	0.0389031	26536.5										39.8879
2019-03-01															0.75	565.283	0.0457537

## Sheet: Plan2
	conc_cred_pessoal_ant	conc_cred_pessoal_nov	sld_cred_total_rl	sld_cred_total_rl_ant	tx_juros_rl_total	tx_juros_rl_total_ant	tx_juros_cred_pessoal	conc_rl_total_encad	conc_rl_pj_encad	conc_rl_pf_encad	renda_real	ibc_br_sa	massa_pnad	massa_pnad_disp	ipca_am	ipca_index	ipca_aa	conc_cred_pessoal_real	sld_cred_total_rl_real	conc_rl_total_enc_real	conc_rl_pj_enc_real	conc_rl_pf_enc_real	hits_cred	hits_cred2	hits_emp	hits_fin	caged_bra	tx_juros_cred_pessoal_real	ibc_br_sa_yoy	ibc_br_sa_at	ibc_br_sa_as	massa_pnad_yoy	massa_pnad_at	massa_pnad_disp_yoy	massa_pnad_disp_at
1994-07-01							243.47								6.84	100
1994-08-01							188.07								1.86	101.86
1994-09-01							199.38								1.53	103.418
1994-10-01							211.65								2.62	106.128
1994-11-01							226.58								2.81	109.11
1994-12-01							218.26								1.71	110.976
1995-01-01							214.78								1.7	112.863											-22433
1995-02-01							221.93								1.02	114.014											60198
1995-03-01							235.07								1.55	115.781											21193
1995-04-01							251.7								2.43	118.594											79786
1995-05-01							230.54								2.67	121.761											83053
1995-06-01							220.07								2.26	124.513											1107
1995-07-01							209.37								2.36	127.451	0.274513										-70928	142.736
1995-08-01							210.61								0.99	128.713	0.263627										-123328	145.808
1995-09-01							205.59								0.99	129.987	0.256906										-72358	143.129
1995-10-01							197.39								1.41	131.82	0.242086										-48661	139.428
1995-11-01							193.57								1.47	133.758	0.225897										-77051	139.474
1995-12-01							183.2								1.56	135.844	0.224089										-30824	131.356
1996-01-01							163.7								1.34	137.665	0.219756										-62111	116.191
1996-02-01							152.86								1.03	139.083	0.219876										-27489	107.283
1996-03-01							142.59								0.35	139.57	0.205461										-35913	101.242
1996-04-01							137.99								1.26	141.328	0.191692										61047	99.7076
1996-05-01							133.74								1.22	143.052	0.174862										107240	98.951
1996-06-01							131.33								1.19	144.755	0.162569										53017	98.9818
1996-07-01							125.66								1.11	146.361	0.148372										9110	96.5043
1996-08-01							120.54								0.44	147.005	0.142118										-12175	93.0975
1996-09-01							120.51								0.15	147.226	0.132618										21353	94.6906
1996-10-01			85451.9	74723882			109.76								0.3	147.668	0.120221		321777								-39755	87.2488
1996-11-01			89524.9	78285546			107.62								0.32	148.14	0.107525		336039								-65337	87.4631
1996-12-01			88598	77475045			111.31								0.47	148.836	0.0956381		331004								-280213	92.8648
1997-01-01			90567.4	79197178			111.31								1.18	150.593	0.0939082		334416								-43115	93.1698
1997-02-01			90444.3	79089590			109.38								0.5	151.346	0.0881696		332300								6361	92.4149
1997-03-01			94959.8	83038192			107.14								0.51	152.117	0.0899046		347120								58881	90.0533
1997-04-01			96440.3	84332786			99.13								0.88	153.456	0.0858145		349456								91159	83.3923
1997-05-01			98595.7	86217579			103.36								0.41	154.085	0.0771254		355808								128952	88.7988
1997-06-01			100139	87567012			103.9								0.54	154.917	0.0702064		359436								79930	90.524
1997-07-01			99859.1	87322333			103.11								0.22	155.258	0.0607862		357645								-7502	91.4712
1997-08-01			100651	88014764			104.05								-0.02	155.227	0.0559279		360553								3748	93.2424
1997-09-01			100814	88157468			101.59								0.06	155.32	0.054979		360921								39171	91.0844
1997-10-01			101474	88734642			102.47								0.23	155.677	0.0542427		362450								7970	92.0525
1997-11-01			100756	88106568			134.52								0.17	155.942	0.0526664		359274								-65646	122.787
1997-12-01			97810.6	85531050			135.46								0.43	156.613	0.0522473		347278								-335644	123.769
1998-01-01			96777.9	84627958			134.95								0.71	157.725	0.0473594		341189								-85320	124.326
1998-02-01			97018.4	84838329			133.83								0.46	158.45	0.0469426		340471								-22128	123.346
1998-03-01			96801.3	84648454			123.18								0.34	158.989	0.0451718		338558								-10705	113.534
1998-04-01			97312.5	85095449			120.49								0.24	159.37	0.0385411		339531								75646	112.307
1998-05-01			96460.4	84350321			115.9								0.5	160.167	0.0394719		334883								85371	107.702
1998-06-01			96629	84497831			116.17								0.02	160.199	0.0340957		335402								18097	109.043
1998-07-01			95992.3	83941057			109.11								-0.12	160.007	0.0305875		333592								-21454	102.904
1998-08-01			96097.3	84032870			103.77								-0.51	159.191	0.0255366		335669								22213	98.696
1998-09-01			94430.2	82575042			117.71								-0.22	158.841	0.0226668		330573								-23202	112.885
1998-10-01			93583.6	81834709			123.84								0.02	158.873	0.0205242		327544								-64093	119.338
1998-11-01			93395.8	81670460			120.13								-0.12	158.682	0.0175697		327279								-118412	116.329
1998-12-01			91354.5	79885481			119.98								0.33	159.206	0.0165564		319073								-437758	116.397
1999-01-01			92545.6	80927010			119.91								0.7	160.32	0.0164555		320986								-41211	116.35
1999-02-01			93799.2	82023281			127.26								1.05	162.003	0.0224251		321954								-78030	122.275
1999-03-01			93307	81592841			126.02								1.1	163.785	0.0301692		316780								-76312	119.401
1999-04-01			94510.1	82644929			119.41								0.56	164.703	0.0334579		319078								57543	112.307
1999-05-01			93996.3	82195600			109.71								0.3	165.197	0.0314012		316394								97182	103.325
1999-06-01			95177.4	83228458			101.76								0.19	165.511	0.0331543		319762								58109	95.2855
1999-07-01			97742.3	85471309			102.02								1.09	167.315	0.0456705		324838								8057	93.1966
1999-08-01			98469.9	86107550			100.52								0.56	168.252	0.0569165		325434								13306	89.7217
1999-09-01			101915	89119784			97.94								0.31	168.773	0.0625305		335777								7207	86.2911
1999-10-01			104648	91510415			94.03								1.19	170.782	0.0749596		340730								17439	80.4998
1999-11-01			107517	94019299			90.31								0.95	172.404	0.0864755		346777								-16170	75.1627
1999-12-01			105812	92527844			86.56								0.6	173.439	0.0893993		339241								-243121	71.2503
2000-01-01			107432	93944582			75.56								0.62	174.514	0.0885339		342312								31198	61.2812
2000-02-01			108285	94690140			76.49								0.13	174.741	0.0786234		344581								88175	63.6252
2000-03-01			110641	96750610			68.94								0.22	175.125	0.0692348		351306								39947	58.0008
2000-04-01			117960	103150620			68.08								0.42	175.861	0.0677462		372979								125071	57.4157
2000-05-01			141203	123476015			66.7								0.01	175.878	0.064659		446428								162837	56.576
2000-06-01	2201530	2236.2	143010	125055951	45.3378	46.25	70.05	51896	34279	17617					0.23	176.283	0.0650841	7053.75	451103	163698	108128	55570.1					142884	59.6588
2000-07-01	2151815	2185.71	145935	127613691	43.1714	44.04	70.57	52181	34715	17467					1.61	179.121	0.0705628	6785.22	453035	161989	107768	54223.9					105842	59.3274
2000-08-01	2604805	2645.83	148963	130261400	42.4852	43.34	69.92	53161	35023	18138					1.31	181.467	0.0785473	8107.41	456455	162897	107318	55578.8					78845	57.5452
2000-09-01	2499707	2539.08	155824	136260999	41.946	42.79	71.62	52789	35633	17157					0.23	181.885	0.0776871	7762.44	476383	161386	108937	52452.2					92678	59.2484
2000-10-01	2719934	2762.77	163533	143002493	42.2793	43.13	72.52	57777	38529	19248					0.14	182.139	0.0665045	8434.51	499253	176388	117626	58762.5					15442	61.7621
2000-11-01	2591728	2632.55	172003	150408712	41.9656	42.81	72	58781	39723	19059					0.32	182.722	0.0598487	8011.31	523434	178881	120884	57999.9					466	62.2873
2000-12-01	2621565	2662.85	176061	153957523	40.8873	41.71	67.72	62538	43682	18856					0.59	183.8	0.0597434	8056.01	532642	189198	132152	57045.6					-225789	58.2647
2001-01-01	2929537	2975.68	179604	157056161	40.956	41.78	67.31	62252	41624	20628					0.57	184.848	0.0592168	8951.37	540283	187265	125213	62052.8					48796	57.9563
2001-02-01	2678791	2720.98	185330	162063065	41.054	41.88	70.94	55388	36901	18487					0.46	185.698	0.0627077	8147.72	554954	165854	110497	55357.6					80243	60.8533
2001-03-01	3358952	3411.85	194903	170434476	41.1422	41.97	68.41	67136	44304	22832					0.38	186.404	0.0644043	10177.8	581411	200271	132162	68109.5					34484	58.22
2001-04-01	3031060	3078.8	202113	176738872	42.7597	43.62	73.06	63096	42308	20788					0.58	187.485	0.0661002	9131.31	599441	187134	125480	61654.5					139997	62.33
2001-05-01	3301272	3353.27	207895	181795024	43.5537	44.43	72.06	68250	45549	22701					0.41	188.254	0.0703642	9904.74	614072	201594	134541	67053.3					161898	60.749
2001-06-01	2838954	2883.67	210930	184448570	43.7105	44.59	74.4	65064	43778	21286					0.52	189.233	0.0734611	8473.59	619812	191189	128641	62548.5					108571	62.4651
2001-07-01	2871244	2916.47	215280	188252749	47.3376	48.29	78.58	68892	47021	21870					1.33	191.749	0.070503	8457.49	624292	199781	136357	63421					71386	66.8188
2001-08-01	3159887	3209.65	220539	192851777	49.5726	50.57	83.07	68734	46176	22559					0.7	193.092	0.0640574	9243.01	635098	197937	132975	64964.3					47327	72.049
2001-09-01	2769566	2813.19	227015	198514976	49.3863	50.38	86.21	63254	42822	20433					0.28	193.632	0.0645882	8078.66	651923	181647	122972	58677.7					80028	74.9127
2001-10-01	3028317	3076.01	228600	199900434	50.896	51.92	89.17	72340	49022	23317					0.83	195.24	0.0719236	8760.7	651069	206030	139618	66408.5					77187	76.4771
2001-11-01	2643513	2685.15	226363	197944122	48.4159	49.39	87.49	68346	45999	22347					0.71	196.626	0.0760908	7593.58	640152	193282	130085	63197.2					-4915	74.2325
2001-12-01	2661601	2703.52	221973	194105573	48.063	49.03	84.25	69180	47685	21494					0.65	197.904	0.0767326	7596.16	623684	194377	133982	60392.3					-253923	71.1195
2002-01-01	3083446	3132.01	225359	197066721	48.6903	49.67	84.73	67738	45113	22625					0.52	198.933	0.0761973	8754.58	629923	189341	126100	63241.3					44228	71.6507
2002-02-01	2764372	2807.91	226100	197714533	48.0532	49.02	83.68	60652	40404	20249					0.36	199.649	0.075126	7820.5	629727	168926	112532	56396.9					82013	70.8451
2002-03-01	2941078	2987.4	227473	198915312	47.5042	48.46	83.64	64119	42347	21772					0.6	200.847	0.0774824	8270.78	629773	177517	117240	60277					90260	70.4343
2002-04-01	3229426	3280.29	230481	201545040	47.2689	48.22	83.09	70459	46353	24105					0.8	202.454	0.0798392	9009.59	633034	193522	127312	66206.4					175090	69.553
2002-05-01	3188861	3239.08	233501	204186087	47.1415	48.09	81.99	68531	44928	23603					0.21	202.879	0.0776883	8877.78	639985	187832	123140	64691.8					155813	68.8707
2002-06-01	2797383	2841.44	239584	209505770	46.0436	46.97	80.77	67457	45642	21815					0.42	203.731	0.0766162	7755.33	653913	184115	124574	59541.1					133346	67.9057
2002-07-01	2977313	3024.2	243737	213137600	45.7593	46.68	82.79	73723	49810	23913					1.19	206.155	0.0751287	8157.09	657425	198851	134351	64499.8					61227	70.0169
2002-08-01	2888250	2933.74	238134	208237789	45.3966	46.31	83.69	69217	46226	22991					0.65	207.495	0.0745949	7861.98	638163	185491	123879	61612.4					78022	70.9388
2002-09-01	2884925	2930.36	250176	218767645	42.7009	43.56	85.42	70384	47085	23300					0.72	208.989	0.0793099	7796.79	665641	187270	125279	61994.1					167312	71.795
2002-10-01	3000440	3047.7	244823	214086561	44.8084	45.71	88.82	75759	51195	24564					1.31	211.727	0.0844479	8004.13	642974	198965	134453	64512.1					36368	74.1162
2002-11-01	2564821	2605.22	244621	213910083	49.1805	50.17	93.26	72859	49416	23442					3.02	218.121	0.109322	6641.47	623611	185739	125976	59760.7					-11751	74.2145
2002-12-01	2480299	2519.36	242881	212388379	49.9647	50.97	91.84	79987	55461	24526	67.7859				2.1	222.702	0.125303	6290.51	606440	199717	138479	61238.1					-249514	70.4785
2003-01-01	2625251	2666.6	243589	213007859	53.131	54.2	95.28	75751	51432	24318	65.3616	100.46			2.25	227.713	0.14467	6511.62	594825	184978	125593	59382.6					35485	70.5993
2003-02-01	3003577	3050.88	232404	203226843	55.366	56.48	98.9	72155	47848	24306	65.0456	101.95			1.57	231.288	0.158471	7334.86	558739	173473	115035	58435.9					84029	71.6918		1.48318
2003-03-01	3039274	3087.14	246419	215482612	56.8266	57.97	100.63	74961	50011	24950	64.2245	102.11			1.23	234.133	0.165726	7331.85	585236	178030	118774	59255.3					21261	72.1073		0.15694
2003-04-01	3175501	3225.51	245422	214610626	56.7776	57.92	98.67	78879	53199	25680	63.4337	101.13			0.97	236.404	0.167692	7586.89	577269	185535	125132	60403.2					154024	70.139		-0.959749
2003-05-01	3265498	3316.93	245406	214597115	56.6208	57.76	98.09	78749	51983	26767	62.5043	99.73			0.61	237.846	0.172353	7754.6	573732	184106	121530	62578.2					140313	68.9679		-1.38436
2003-06-01	3069320	3117.66	245269	214477214	55.6013	56.72	96.56	74392	48555	25837	62.9068	100.34			-0.15	237.489	0.165699	7299.69	574273	174181	113687	60494.7					125795	68.6199		0.611651
2003-07-01	3288551	3340.34	243162	212634259	53.7878	54.87	91.71	78797	51526	27271	62.1198	99.03			0.2	237.964	0.154294	7805.47	568202	184127	120402	63724.8					37233	66.0842		-1.30556
2003-08-01	3210724	3261.29	244639	213925940	51.641	52.68	87.5	73845	48013	25832	63.5108	99.8			0.34	238.773	0.150739	7594.92	569717	171971	111813	60157.7					79772	62.9388		0.777542
2003-09-01	3681282	3739.26	246930	215929402	48.8178	49.8	83.92	81086	53179	27907	62.755	101.73			0.78	240.635	0.151424	8640.62	570602	187372	122885	64487					161765	59.7326		1.93387
2003-10-01	3884268	3945.44	249240	217949708	47.6022	48.56	83.27	83532	54329	29203	62.4686	101.57			0.29	241.333	0.139832	9090.7	574275	192466	125180	67286.7					70870	60.7869		-0.157279
2003-11-01	3396912	3450.41	253878	222005421	47.0925	48.04	81.97	78289	51572	26717	63.0415	101.97			0.34	242.154	0.11018	7923.16	582979	179775	118424	61350.1					34804	63.9104		0.393817
2003-12-01	4345343	4413.78	256416	224224353	44.9163	45.82	80.32	92163	62075	30088	63.2281	101.6			0.52	243.413	0.0929995	10082.9	585760	210539	141805	68733.5					-299918	64.9772		-0.362852	-0.00330186
2004-01-01	3981335	4044.04	256914	224659626	44.4948	45.39	79.06	78618	50935	27683	62.2747	103.58			0.76	245.263	0.0770722	9168.58	582471	178241	115479	62762.5	100	0	35	70	100106	66.247	3.10571	1.94882	0.986281
2004-02-01	3869022	3929.96	261793	228926688	44.2399	45.13	76.63	73845	48166	25679	62.4664	104.57			0.61	246.759	0.0668921	8855.92	589935	166405	108539	57866	81	73	30	52	139074	65.5556	2.56989	0.955783	2.13904
2004-03-01	4878711	4955.55	266015	232618701	44.4457	45.34	76.54	93154	61496	31658	63.7011	105.97	68306.8	63962.9	0.47	247.919	0.0588822	11114.8	596645	208935	137929	71005.6	92	50	26	55	108212	66.723	3.78024	1.33882	2.90814
2004-04-01	4553873	4625.6	274200	239776129	43.8478	44.73	75.26	87589	58187	29403	63.4732	106.6	69006.2	64308.2	0.37	248.836	0.05259	10336.5	612736	195729	130026	65704.8	78	77	34	54	187547	66.5036	5.40888	0.594508	3.66822		1.02391		0.539844
2004-05-01	4780106	4855.39	283810	248179659	43.338	44.21	72.67	89962	59743	30219	63.1914	106.29	69906.3	65041.2	0.51	250.105	0.0515438	10794.9	630993	200012	132826	67185.6	83	31	48	63	291822	64.2062	6.57776	-0.290807	3.99874		1.30438		1.13982
2004-06-01	4746083	4820.83	287872	251730942	43.093	43.96	71.89	91070	60872	30199	64.2088	107.27	71770.3	66853.2	0.71	251.881	0.0606006	10642.5	635510	201048	134382	66667.8	85	92	29	63	207895	62.0685	6.90652	0.922006	4.71851		2.66643		2.78593
2004-07-01	4839074	4915.29	290688	254194151	43.0341	43.9	71.66	92307	61362	30946	65.3615	107.77	72955.5	68198.6	0.91	254.173	0.0681159	10753.2	635941	201941	134242	67700.8	73	100	25	65	202033	60.7129	8.82561	0.466114	4.62433		1.65138		2.01247
2004-08-01	5083296	5163.36	295468	258373865	43.0538	43.92	73.82	94350	62373	31977	64.5099	108.24	74062.8	69307.4	0.69	255.927	0.0718416	11218.5	641968	204996	135519	69476.9	77	54	21	58	229757	62.1695	8.45691	0.436114	4.40961		1.51777		1.62584
2004-09-01	4961655	5039.8	300919	263140624	44.2007	45.09	73.87	93218	61739	31479	66.5007	109.47	73784.2	68990	0.33	256.771	0.0670557	10914	651662	201870	133700	68170	88	27	25	52	199742	62.9437	7.60838	1.13636	4.25992		-0.376167		-0.45796
2004-10-01	5179826	5261.41	308855	270080072	44.3183	45.21	71.87	97532	64996	32536	65.735	108.51	73983.4	69400.5	0.44	257.901	0.0686516	11344	665917	210287	140137	70150.3	83	27	32	55	130159	60.8288	6.83273	-0.876953	3.72583		0.269976		0.595014
2004-11-01	5248270	5330.93	311900	272742744	44.3281	45.22	70.93	101803	66919	34884	66.5529	109.62	74074.1	69355.5	0.69	259.681	0.0723792	11415.2	667874	217992	143294	74697.4	84	55	23	64	79022	59.3932	7.50221	1.02295	3.54274		0.122595		-0.064841
2004-12-01	5706385	5796.26	310347	271384922	43.7007	44.58	68.37	107542	72295	35248	64.8694	108.82	79713.9	73849.1	0.86	261.914	0.0760064	12305.7	658882	228317	153486	74833.2	74	42	42	55	-352093	56.4768	7.1063	-0.729794	2.86151		7.61373		6.47908
2005-01-01	5792048	5883.27	317356	277513628	45.2692	46.18	71.17	99128	66180	32948	65.7539	109.64	80560.2	74566.5	0.58	263.433	0.0740842	12418.4	669877	209240	139693	69546.9	77	53	40	72	115972	59.3637	5.85055	0.753538	2.47936		1.06167		0.97144
2005-02-01	5612331	5700.72	325796	284894607	45.524	46.44	70	93612	61752	31860	66.0139	110.19	81584.6	75717	0.59	264.987	0.0738707	11962.5	683660	196438	129582	66855.9	70	28	28	70	73285	58.3058	5.37439	0.501642	2.19734		1.2716		1.54292
2005-03-01	6931521	7040.69	332868	291078482	45.7397	46.66	68.71	108201	71157	37044	66.4823	110.47	77045.2	72094.3	0.61	266.604	0.0753671	14684.8	694264	225675	148412	77262.8	69	40	34	53	102965	56.886	4.24648	0.254107	1.79822	12.7929	-5.56404	12.7127	-4.78453
2005-04-01	6349404	6449.41	342466	299471603	46.171	47.1	68.68	104495	69231	35264	65.5372	111.1	77733.5	72242.4	0.87	268.923	0.0807241	13335.5	708122	216066	143150	72915.9	75	33	41	56	266095	56.0805	4.22139	0.570291	1.89792	12.6471	0.893372	12.3378	0.205425
2005-05-01	6548290	6651.42	345416	302051237	46.8866	47.83	69.93	111586	72962	38624	65.1937	110.92	78324.1	72568.2	0.49	270.241	0.0805091	13686.2	710739	229603	150129	79474	71	18	41	58	212450	57.2685	4.35601	-0.162016	1.57633	12.0415	0.759775	11.5727	0.450982
2005-06-01	6439875	6541.3	350501	306497273	46.3867	47.32	68.56	111477	72806	38672	66.4428	110.57	80415.4	74675.9	-0.02	270.187	0.072677	13462.3	721345	229424	149838	79588.7	72	36	38	59	195536	57.1396	3.07635	-0.315543	1.60324	12.0455	2.67006	11.7013	2.90444
2005-07-01	6009714	6104.37	357192	312348781	46.2887	47.22	69.41	105630	68392	37238	67.7236	110.65	81899.9	76475.5	0.25	270.862	0.0656611	12531.7	733284	216849	140403	76446.3	61	19	35	59	117473	58.9717	2.67236	0.0723524	1.46722	12.2601	1.84604	12.1365	2.40988
2005-08-01	6620213	6724.48	363124	317535537	46.4847	47.42	69.47	114694	74060	40634	68.8341	111.26	82877.6	77389.5	0.17	271.323	0.0601577	13781.3	744195	235057	151781	83276.4	65	49	38	63	135460	59.8536	2.7901	0.551288	1.32876	11.9018	1.19377	11.6612	1.19515
2005-09-01	6298566	6397.77	369778	323354719	47.1709	48.12	70.55	112335	72777	39558	69.1016	110.94	82109.2	76772.5	0.35	272.272	0.060369	13066	755190	229419	148631	80788.5	63	15	27	56	189458	60.8402	1.34283	-0.287615	1.2461	11.2829	-0.92715	11.2806	-0.797266
2005-10-01	5617721	5706.2	377475	330085202	47.2003	48.15	70.27	109768	71860	37908	68.4288	110.86	81829.2	76230.5	0.75	274.314	0.0636418	11566.9	765170	222508	145666	76842.4	64	44	38	59	118175	60.0821	2.1657	-0.0721111	0.812318	10.6048	-0.341009	9.84143	-0.705982
2005-11-01	5753187	5843.8	386520	337994991	46.122	47.05	68.74	115499	75619	39880	68.96	111.82	84193.4	78324.1	0.55	275.823	0.0621629	11781	779220	232845	152447	80397.6	72	29	32	68	13831	58.8645	2.00693	0.865957	0.750219	13.6611	2.88919	12.9313	2.74641
2005-12-01	6067850	6163.42	389539	340634547	45.0241	45.93	67.28	120934	79964	40970	70.3389	112.3	90363.6	83103.5	0.36	276.816	0.0568973	12380.8	782489	242927	160628	82298.8	55	31	28	50	-286719	58.2746	3.19794	0.429261	0.745222	13.3599	7.3286	12.5315	6.10208
2006-01-01	6678666	6783.85	393236	343867597	45.1515	46.06	68.92	112173	72227	39946	68.0606	113.38	91899	84991.1	0.59	278.449	0.0570024	13547.2	785282	224007	144235	79771.1	54	28	33	68	86616	59.8104	3.41116	0.96171	1.00316	14.0749	1.69914	13.9803	2.27138
2006-02-01	6284521	6383.5	400545	350258758	45.2986	46.21	68.59	97245	62443	34801	68.9725	113.62	90591.3	84091.8	0.41	279.591	0.055111	12695.6	796612	193403	124188	69212.9	55	43	26	53	176632	59.7841	3.11281	0.211678	1.19554	11.0397	-1.42298	11.0607	-1.05811
2006-03-01	7885725	8009.92	408600	357302919	44.8182	45.72	67.81	129232	82917	46314	69.1867	113.6	85474.3	80125.7	0.43	280.793	0.0532233	15862.1	809153	255919	164201	91715.8	58	16	32	58	76455	59.3299	2.83335	-0.0176025	1.5238	10.9405	-5.64845	11.1401	-4.71639
2006-04-01	6779703	6886.48	417896	365431382	44.1517	45.04	65.26	109246	70962	38284	69.0634	114.34	85832.7	79550.1	0.21	281.383	0.046332	13608.8	825827	215887	140232	75655.1	55	0	34	53	229803	57.9422	2.91629	0.651408	2.08358	10.4192	0.419307	10.1155	-0.718371
2006-05-01	7978917	8104.58	427024	373413825	42.9655	43.83	62.29	126575	82443	44133	70.6281	115.6	87156.4	80695.4	0.1	281.664	0.0422712	15999.9	843023	249882	162757	87126.5	58	49	31	53	198837	55.708	4.21926	1.10198	2.51314	11.2766	1.54219	11.1994	1.43972
2006-06-01	7177439	7290.48	430175	376168903	42.3578	43.21	62.16	116581	75770	40811	71.6856	114.73	89141.7	82443.2	-0.21	281.073	0.0402905	14423	851030	230636	149898	80737.8	55	31	34	51	155455	55.8795	3.76232	-0.752595	2.61144	10.8515	2.27786	10.4013	2.16592
2006-07-01	7541634	7660.41	436631	381814804	41.3285	42.16	59.78	116678	76224	40454	71.0919	116.92	90299.1	84151.3	0.19	281.607	0.0396678	15126.1	862165	230390	150511	79879.8	47	26	25	60	154357	53.6837	5.66652	1.90883	2.72161	10.2554	1.29838	10.0369	2.07185
2006-08-01	8134142	8262.25	439071	383948516	41.0344	41.86	59.12	123070	79959	43111	72.5167	116.6	90794.1	84395.5	0.05	281.748	0.0384224	16306.4	866550	242891	157807	85083.7	50	17	25	55	128915	53.2324	4.79957	-0.273691	2.8042	9.55204	0.548178	9.05291	0.290192
2006-09-01	7249768	7363.95	447496	391315601	40.7207	41.54	58.88	117887	76943	40944	72.2315	116.85	92745.8	86349.4	0.21	282.339	0.0369736	14503	881326	232174	151536	80637.6	52	34	22	57	176735	53.2151	5.3272	0.214408	2.88049	12.9542	2.14959	12.4744	2.31517
2006-10-01	7661788	7782.46	452762	395919959	40.554	41.37	58.58	125421	82238	43183	73.4225	117.98	92640.3	86255.7	0.33	283.271	0.0326508	15276.8	888763	246199	161432	84767.5	50	24	21	59	129795	53.566	6.42251	0.967052	2.88929	13.2118	-0.113752	13.1512	-0.108513
2006-11-01	7930961	8055.87	462233	404202035	40.1717	40.98	58.56	124774	81390	43384	73.6606	118.87	94583.8	88042.8	0.31	284.149	0.030186	15764.7	904551	244172	159273	84898.9	55	19	22	64	32579	53.914	6.30478	0.754365	2.79861	12.3411	2.0979	12.4083	2.07186
2006-12-01	7712239	7833.7	468255	409467912	39.0346	39.82	57.18	129637	86722	42915	74.4308	119.99	97748.9	89564.5	0.48	285.513	0.0314177	15256.7	911958	252477	168897	83579.9	41	17	20	51	-317493	52.3922	6.84773	0.942206	3.20166	8.17287	3.34634	7.77464	1.72836
2007-01-01	9045397	9187.86	470977	411848297	39.1522	39.94	57.23	126100	81305	44795	72.5923	119.67	98739.1	90799.4	0.44	286.769	0.0298797	17815.6	913241	244513	157653	86859.1	42	30	26	64	105468	52.6683	5.54772	-0.266689	3.07051	7.44306	1.013	6.83401	1.37878
2007-02-01	8380547	8512.54	480398	420086587	38.4857	39.26	54.47	111754	70469	41285	73.6401	120.19	98310.1	90557.2	0.44	288.031	0.0301874	16433.8	927428	215746	136043	79702.4	44	8	27	59	148019	49.9436	5.78243	0.434528	3.14546	8.52046	-0.434478	7.6885	-0.266742
2007-03-01	9990637	10148	490460	428885615	37.7505	38.51	53.42	131787	84342	47445	73.9478	119.42	94670.4	88459.6	0.37	289.097	0.0295719	19518.9	943363	253482	162226	91256.9	49	22	26	60	146141	49.0134	5.12324	-0.640652	3.03292	10.7589	-3.70226	10.401	-2.31633
2007-04-01	9153155	9297.31	505753	440889088	37.3485	38.1	52.47	130755	85940	44814	73.9399	121.29	95403.4	88114.1	0.25	289.82	0.0299829	17838.1	970352	250870	164887	85981.4	48	29	22	61	301991	48.0316	6.07836	1.5659	2.96989	11.1504	0.774265	10.7655	-0.390574
2007-05-01	11262450	11439.8	514647	446454109	36.4957	37.23	51.66	136786	87319	49466	74.0655	122.31	96364.2	88884.8	0.28	290.631	0.031835	21887.5	984660	261709	167065	94641.9	52	21	27	70	212217	46.9809	5.8045	0.84096	2.98027	10.5647	1.00709	10.1485	0.874661
2007-06-01	9597679	9748.84	525046	452495224	35.9958	36.72	51.06	131481	85840	45641	74.7853	123.4	97321.2	89848.3	0.28	291.445	0.0369016	18600.1	1.00175e+06	250856	163777	87079.8	50	34	26	62	181667	45.684	7.55687	0.891178	2.69651	9.17584	0.993107	8.98206	1.08399
2007-07-01	10010252	10167.9	541348	462194625	35.1919	35.9	50.61	139433	91588	47845	73.9929	124.26	98100.3	91151.8	0.24	292.144	0.0374191	19353.2	1.03038e+06	265391	174325	91066.3	48	34	29	70	126992	45.1776	6.2778	0.696921	2.94524	8.63929	0.800545	8.31894	1.45078
2007-08-01	10506154	10671.6	559351	474134511	35.0155	35.72	49.89	141760	92375	49384	74.3703	124.29	98742.3	91745.6	0.47	293.517	0.0417741	20216.9	1.05967e+06	268558	175001	93555.9	49	24	28	64	133329	43.8796	6.5952	0.0241429	3.00189	8.75409	0.654432	8.70911	0.651441
2007-09-01	9100858	9244.19	571372	483626841	34.7998	35.5	49.43	127292	83129	44163	75.5567	125.36	100628	93459.4	0.18	294.046	0.0414622	17481.3	1.0805e+06	240716	157201	83514.6	50	16	23	67	251168	43.481	7.28284	0.86089	3.46171	8.49904	1.91002	8.23399	1.86799
2007-10-01	10778853	10948.6	586902	494011072	34.7214	35.42	48.88	147406	96248	51158	75.9479	126.19	100932	93712.3	0.3	294.928	0.0411508	20642.5	1.10654e+06	277919	181466	96453.2	46	21	24	71	205260	42.9956	6.95881	0.662093	3.66679	8.94988	0.301307	8.64476	0.270599
2007-11-01	10699740	10868.3	607215	510624877	34.0548	34.74	46.75	144426	94502	49925	77.37	126.17	102698	95099.8	0.38	296.049	0.0418774	20413.4	1.14051e+06	271270	177499	93772.1	48	33	24	69	124554	40.8515	6.14116	-0.0158491	3.70744	8.57832	1.7497	8.01542	1.4806
2007-12-01	10238632	10399.9	627514	523727373	33.1628	33.83	45.8	149524	100311	49213	77.9674	126.96	108915	100244	0.74	298.239	0.0445733	19390.2	1.16998e+06	278782	187026	91755.8	36	30	22	62	-319414	39.5785	5.80882	0.626139	3.71069	11.4228	6.0538	11.9238	5.40926
2008-01-01	10741919	10911.1	637031	533192423	36.5349	37.27	53.08	145339	95374	49965	77.3923	127.18	110894	101966	0.54	299.85	0.0456133	20234.1	1.18134e+06	269524	176866	92657.5	44	31	27	86	142921	46.4021	6.27559	0.173283	3.45889	12.3101	1.81739	12.2982	1.71791
2008-02-01	10209500	10370.3	650206	541753863	36.6427	37.38	52.59	133921	86600	47321	78.0262	126.83	110936	102238	0.49	301.319	0.0461338	19137.4	1.19989e+06	247139	159812	87326.5	43	25	24	81	204963	45.8609	5.52459	-0.275201	3.22734	12.8425	0.0375133	12.8983	0.266167
2008-03-01	12253961	12447	675746	558876097	36.8878	37.63	50.48	148365	97544	50821	78.3716	126.48	105010	97158.9	0.48	302.765	0.0472803	22860	1.24107e+06	272486	179148	93337.4	42	19	26	79	206556	43.6865	5.91191	-0.27596	2.55092	10.9218	-5.34139	9.83421	-4.96745
2008-04-01	11597759	11780.4	694533	570788117	36.6918	37.43	50.6	149626	97173	52453	79.398	127.79	106190	97621.8	0.55	304.431	0.0504143	21517.5	1.2686e+06	273299	177491	95807.8	49	42	24	73	294522	43.372	5.35906	1.03574	2.09169	11.3068	1.12408	10.7902	0.476436
2008-05-01	10912100	11084	714469	585362795	36.8486	37.59	48.39	147429	97386	50043	79.1124	129.44	108434	99652.5	0.79	306.836	0.0557565	20086.7	1.29478e+06	267175	176486	90689.3	47	34	25	75	202984	40.5532	5.82945	1.29118	2.00221	12.5248	2.11234	12.1142	2.08017
2008-06-01	10486805	10652	730738	597426046	37.2799	38.03	51.39	151144	100790	50354	79.8264	131.11	110567	101805	0.74	309.106	0.0605994	19162	1.31454e+06	271895	181313	90582.6	51	55	26	69	309442	42.74	6.24797	1.29017	2.07108	13.6103	1.96738	13.308	2.16031
2008-07-01	11046848	11220.8	747211	605029042	38.6229	39.4	53.59	155913	103253	52659	79.7623	130.91	112386	104137	0.53	310.744	0.0636678	20078.9	1.33708e+06	278996	184764	94229.7	48	33	24	72	203218	44.3966	5.35168	-0.152544	2.1702	14.5619	1.64489	14.2461	2.29075
2008-08-01	9641760	9793.61	765976	617752277	39.3385	40.13	54.49	147370	97944	49427	82.0139	131.02	114636	106464	0.28	311.615	0.0616563	17476.1	1.36684e+06	262972	174775	88199.3	44	31	23	65	239123	45.5179	5.41476	0.0840272	2.38042	16.0965	2.00275	16.0421	2.23368
2008-09-01	10268843	10430.6	794301	639031340	39.5738	40.37	56.31	162011	110040	51970	83.3549	130.84	116631	108245	0.26	312.425	0.0625041	18564.4	1.4137e+06	288349	195850	92496.6	46	34	26	73	282841	47.1147	4.37141	-0.137384	2.80333	15.9027	1.73985	15.8203	1.67334
2008-10-01	9185386	9330.05	814746	660236944	42.0833	42.93	57.42	156782	106778	50004	82.8945	128.12	116429	108058	0.45	313.831	0.0640931	16531.3	1.4436e+06	277792	189193	88598.8	48	31	22	65	61401	47.9382	1.52944	-2.07887	2.63065	15.3542	-0.173367	15.3078	-0.173126
2008-11-01	8484158	8617.78	825652	671620603	43.1812	44.05	59.88	142181	96055	46126	83.2889	124.93	118219	109271	0.36	314.96	0.063881	15214.5	1.45767e+06	251018	169583	81434.5	45	38	21	67	-40821	50.28	-0.982801	-2.48985	1.60198	15.1138	1.53768	14.9013	1.12283
2008-12-01	8010831	8137	833190	669086673	42.4264	43.28	60.44	162023	112130	49893	83.6844	120.94	123944	113971	0.28	315.842	0.0590231	14325.6	1.46687e+06	285250	197410	87839.1	36	17	20	64	-654946	51.4981	-4.74165	-3.19379	-0.26924	13.7997	4.84313	13.6933	4.30105
2009-01-01	8806260	8944.96	828359	664033110	41.5637	42.4	56.51	133565	84446	49119	84.028	120.8	126320	115813	0.48	317.358	0.0583911	15672.8	1.4514e+06	234025	147961	86063.3	36	32	22	91	-101748	47.8754	-5.01651	-0.11576	-2.05939	13.9109	1.91683	13.5796	1.6162
2009-02-01	8847599	8986.95	826524	666894339	40.5148	41.33	54.49	123270	78332	44939	83.0614	122.21	125170	115450	0.55	319.104	0.0590231	15660.3	1.44026e+06	214805	136498	78308.7	40	31	23	84	9179	45.8797	-3.64267	1.16722	-3.72192	12.8311	-0.910701	12.9237	-0.312833
2009-03-01	11223918	11400.7	834475	673876189	38.4268	39.2	50.84	155470	100893	54577	83.0899	123	119411	110665	0.2	319.742	0.056072	19826.7	1.45122e+06	270374	175461	94913.6	44	29	25	89	34818	42.8312	-2.75142	0.646428	-5.26302	13.7139	-4.60079	13.9008	-4.14516
2009-04-01	12445226	12641.2	838679	675957060	37.8093	38.57	48.78	143006	89601	53405	82.4937	123.68	119573	110556	0.48	321.277	0.0553368	21879.1	1.45156e+06	247510	155079	92431.8	42	22	22	95	106205	40.9787	-3.21621	0.552846	-5.87121	12.6023	0.135498	13.2492	-0.0984053
2009-05-01	11614552	11797.5	847745	677520206	37.1231	37.87	46.62	140025	87260	52765	81.9235	124.88	120859	111388	0.47	322.787	0.0519862	20323.2	1.46039e+06	241217	150320	90896.8	42	33	20	87	131557	39.3745	-3.52287	0.970246	-5.33124	11.4586	1.07524	11.7768	0.753013
2009-06-01	12139006	12330.2	854231	682072746	35.9173	36.64	45.64	152294	96292	56002	82.359	125.89	122732	113235	0.36	323.949	0.048018	21164.7	1.46628e+06	261412	165285	96127.1	39	18	19	79	119495	38.9671	-3.98139	0.808776	-3.43002	11.0026	1.55016	11.227	1.6578
2009-07-01	12119756	12310.6	852380	680994212	35.2409	35.95	44.78	152149	94739	57410	83.1649	126.25	124171	115363	0.24	324.726	0.0449947	21080.5	1.4596e+06	260538	162230	98308	39	37	16	80	138402	38.5462	-3.5597	0.285964	-1.41941	10.4866	1.17239	10.7795	1.87919
2009-08-01	11690195	11874.3	861333	690638459	34.7214	35.42	44.29	149123	93213	55909	84.6022	128.06	126214	117378	0.15	325.213	0.04364	20302.9	1.47272e+06	254973	159377	95594.3	37	23	17	84	242126	38.2565	-2.2592	1.43366	0.524176	10.0994	1.64531	10.2516	1.74649
2009-09-01	11042727	11216.6	870856	698592222	34.5548	35.25	44.71	153539	97502	56038	85.3763	129.14	127771	119102	0.24	325.994	0.0434319	19132.5	1.48544e+06	261895	166312	95585.4	40	30	19	88	252617	38.6866	-1.2993	0.843355	2.41892	9.55184	1.23386	10.0304	1.46936
2009-10-01	11464284	11644.8	879979	707994199	34.9077	35.61	45.74	154128	96176	57953	85.5858	129.85	127533	118824	0.28	326.907	0.041666	19807.4	1.49681e+06	262166	163592	98575.9	38	21	17	82	230956	39.9105	1.3503	0.549791	3.87596	9.5376	-0.186349	9.96357	-0.233748
2009-11-01	11190941	11367.2	892321	717589734	34.2019	34.89	43.64	154157	97849	56308	85.9697	129.99	129056	119874	0.41	328.247	0.0421849	19256.2	1.51161e+06	261145	165758	95386.7	40	22	17	83	246695	37.8258	4.05027	0.107817	4.57778	9.16705	1.1942	9.70368	0.883828
2009-12-01	10888801	11060.3	902959	721552079	33.6039	34.28	44.35	165015	105376	59639	85.8144	131.33	134135	123609	0.37	329.462	0.0431203	18667.3	1.52399e+06	278508	177851	100657	34	25	14	78	-415192	38.3829	8.59104	1.03085	4.61335	8.22207	3.93557	8.45673	3.11552
2010-01-01	10985710	11158.7	904156	726711945	34.4469	35.14	44.83	138702	83448	55254	85.8831	133.47	135814	124710	0.75	331.933	0.0459233	18693.2	1.51465e+06	232355	139793	92562	32	21	14	100	181419	38.471	10.4884	1.62948	4.81694	7.51574	1.25165	7.68292	0.891198
2010-02-01	11422636	11602.5	912036	738234397	33.7117	34.39	43.81	140600	85143	55458	87.0152	135.2	135858	125269	0.78	334.522	0.0483157	19286.2	1.51603e+06	233711	141528	92184.7	35	21	18	98	209425	37.182	10.6292	1.29617	4.95105	8.53919	0.0325445	8.50478	0.447998
2010-03-01	15131146	15369.5	922991	747978849	33.5451	34.22	42.69	174907	105117	69790	87.5019	136.52	132706	122963	0.52	336.261	0.0516636	25415.6	1.5263e+06	289234	173826	115408	37	26	18	93	266415	35.6803	10.9919	0.976331	5.07455	11.1341	-2.32006	11.1132	-1.84084
2010-04-01	13177861	13385.4	931127	758529692	33.6333	34.31	42.87	159638	96173	63465	87.9995	137.2	134362	123914	0.57	338.178	0.0526056	22009.2	1.53103e+06	262488	158135	104354	39	27	20	94	305068	35.7298	10.9314	0.498096	5.18801	12.3686	1.24787	12.0823	0.772914
2010-05-01	13964510	14184.4	946955	775409393	34.1822	34.87	43.04	167754	102291	65463	87.4683	136.46	135379	124436	0.43	339.632	0.0521865	23223.2	1.55038e+06	274652	167474	107178	39	18	19	91	298041	35.9455	9.2729	-0.539359	5.33035	12.0141	0.756387	11.7132	0.421181
2010-06-01	13633308	13848	961569	792859899	33.9274	34.61	41.97	171837	106720	65117	87.9343	136.2	136531	125586	0	339.632	0.0484123	22672.4	1.57431e+06	281337	174725	106612	38	32	18	82	212952	35.4143	8.18969	-0.190532	5.21933	11.243	0.851094	10.9078	0.924977
2010-07-01	13770220	13987.1	969380	801631504	34.7018	35.4	42.21	165931	99028	66903	90.5569	136.9	138725	128682	0.01	339.666	0.0460067	22897.8	1.58694e+06	271640	162116	109525	34	21	14	88	181796	35.9552	8.43564	0.51395	4.68638	11.7208	1.60689	11.5457	2.46507
2010-08-01	15100869	15338.7	982429	814782168	34.5155	35.21	41.96	172371	102260	70110	92.1542	137.69	142325	132223	0.04	339.802	0.0448578	25100.5	1.60766e+06	282070	167340	114729	40	28	18	86	299415	35.8654	7.51991	0.577064	4.0546	12.7646	2.59499	12.6478	2.75182
2010-09-01	14156905	14379.9	1002374	835653877	34.3881	35.08	41.63	173733	104731	69001	94.096	139.31	145208	135000	0.45	341.331	0.0470467	23426	1.63295e+06	283025	170615	112408	39	23	16	82	246875	35.2662	7.87517	1.17656	3.44065	13.6468	2.02586	13.3474	2.09955
2010-10-01	12986435	13191	1018637	852456174	34.6528	35.35	43.55	169974	101198	68776	94.8797	138.81	145783	135539	0.75	343.891	0.0519541	21329.2	1.64709e+06	274840	163633	111208	37	24	14	81	204804	36.4603	6.90027	-0.358912	2.695	14.31	0.396121	14.0672	0.399779
2010-11-01	14396206	14622.9	1039882	872211043	34.1136	34.8	41.99	181375	108441	72933	94.297	140.06	146966	136020	0.83	346.745	0.0563543	23450	1.6676e+06	290861	173901	116959	39	29	16	88	138247	34.4151	7.74675	0.900511	2.31924	13.8775	0.811342	13.4692	0.354953
2010-12-01	13798916	14016.2	1055664	880079044	34.3489	35.04	44.11	188898	117202	71696	93.8747	138.34	152740	140506	0.63	348.93	0.0590907	22336.4	1.68231e+06	301029	186774	114255	34	42	14	82	-407510	36.0696	5.3377	-1.22805	1.97043	13.87	3.92873	13.6694	3.29745
2011-01-01	12386649	12581.7	1056671	890133108	36.6623	37.4	48.32	159971	94902	65070	93.1644	140.11	154334	141291	0.83	351.826	0.0599316	19885.3	1.67006e+06	252832	149991	102842	33	29	17	90	152091	39.9336	4.9749	1.27946	1.93529	13.6361	1.0436	13.2953	0.559124
2011-02-01	14108851	14331.1	1071299	908022650	37.3191	38.07	47.96	165007	97679	67328	92.7	140.65	154836	142458	0.8	354.64	0.060142	22470.3	1.67974e+06	258722	153155	105567	34	24	19	88	280799	39.5662	4.03107	0.385411	1.98667	13.969	0.325593	13.7216	0.826025
2011-03-01	14865867	15100	1085142	919429752	38.27	39.04	42.86	175059	109581	65478	93.4566	141.15	148694	137050	0.79	357.442	0.0629896	23490.4	1.68811e+06	272331	170470	101861	35	37	17	81	92675	34.3945	3.39144	0.355492	1.86462	12.0473	-3.96709	11.4559	-3.79655
2011-04-01	13747806	14025	1102014	936086634	39.07	39.84	44.18	166179	103576	62603	91.8184	140.97	151734	139275	0.77	360.194	0.0651035	21651.3	1.70125e+06	256542	159897	96644.5	37	32	18	81	272225	35.3671	2.74781	-0.127524	1.92762	12.9285	2.0442	12.3969	1.62372
2011-05-01	15585360	16170	1118688	952286968	38.76	39.98	44.37	181787	113790	67997	93.3274	141.22	153075	140112	0.47	361.887	0.0655277	24845.9	1.71891e+06	279324	174843	104480	39	27	17	77	252067	35.4915	3.4882	0.177343	1.62491	13.072	0.88438	12.5977	0.60061
2011-06-01	15717815	16203	1135092	969231372	38.64	39.48	44.31	180782	114214	66568	93.4748	142.15	156488	143607	0.15	362.43	0.067126	24859.4	1.74151e+06	277364	175232	102132	37	37	16	74	215393	35.2324	4.36858	0.658547	1.82166	14.6176	2.22962	14.3494	2.49508
2011-07-01	15137076	15527	1143774	979457629	39.02	39.65	44.79	172450	108233	64217	96.0018	142.22	157842	146118	0.16	363.01	0.0687265	23784.2	1.75203e+06	264158	165791	98367.2	34	27	15	75	140563	35.479	3.88605	0.0492438	1.68281	13.7804	0.864793	13.549	1.74789
2011-08-01	16797790	17232	1159377	995907888	38.05	39.67	44.28	191969	122466	69503	97.3332	141.9	159838	148275	0.37	364.353	0.0722519	26298.6	1.76938e+06	292973	186901	106072	36	47	15	77	190446	34.5579	3.05759	-0.225004	1.47263	12.3049	1.26449	12.1397	1.47648
2011-09-01	15165410	16214	1181379	1019153747	38.33	38.96	44.38	181259	112944	68315	95.4613	141.79	161388	149805	0.53	366.284	0.0731059	24614.5	1.79345e+06	275169	171460	103709	36	29	14	76	209078	34.544	1.7802	-0.0775194	1.32639	11.1426	0.969985	10.9671	1.03193
2011-10-01	13765241	14668	1189585	1028050800	38.75	39.53	45.06	174023	106893	67130	95.7625	141.72	160067	148530	0.43	367.859	0.0696975	22172.2	1.79818e+06	263053	161580	101474	37	39	14	72	126143	35.6084	2.09639	-0.0493688	1.15538	9.79784	-0.818648	9.58461	-0.85104
2011-11-01	15539770	17107	1208000	1045612770	37.92	38.47	43.39	185643	115997	69646	96.3818	142.23	162963	150694	0.52	369.772	0.0664087	25725.2	1.81657e+06	279166	174434	104732	37	30	14	75	42735	34.4606	1.54934	0.359865	1.13599	10.8846	1.80918	10.7877	1.45674
2011-12-01	14146538	15100	1231006	1060444210	35.88	37.05	42.36	198456	130914	67542	97.0474	140.45	170138	156575	0.5	371.621	0.0650311	22594.1	1.84195e+06	296950	195887	101063	31	27	12	66	-408172	33.6675	1.52523	-1.25149	0.479764	11.3907	4.40309	11.4366	3.90248
2012-01-01	14602051	15390	1227640	1064169687	37.13	38	44.8	169154	103412	65742	96.4802	138.83	173207	158674	0.56	373.702	0.0621792	22899.8	1.82669e+06	251696	153874	97821.9	32	33	15	85	118895	36.3235	-0.913568	-1.15344	-0.169739	12.2288	1.80383	12.3027	1.34064
2012-02-01	14354945	15167	1234897	1071105933	37.56	38.13	45.22	161666	97893	63773	98.0932	140.47	175741	161952	0.45	375.384	0.0584911	22466.9	1.82925e+06	239476	145009	94467	33	31	15	81	150600	37.1953	-0.127977	1.1813	-0.484928	13.5012	1.46299	13.6835	2.06575
2012-03-01	16114888	16722	1258473	1090024719	37.07	37.28	43.86	192287	123542	68745	100	139.98	167828	154907	0.21	376.172	0.0523999	24718.4	1.86027e+06	284238	182619	101619	34	29	18	80	111746	36.6971	-0.828905	-0.348829	-0.772714	12.8679	-4.50287	13.0299	-4.34964
2012-04-01	16086200	17044	1274265	1107541194	36.03	35.07	41.4	183804	116294	67510	101.141	141.15	169819	156190	0.64	378.579	0.0510423	25034.2	1.87164e+06	269971	170812	99158.4	36	39	22	90	216974	34.5331	0.127687	0.835834	-0.927145	11.9194	1.18663	12.1452	0.828238
2012-05-01	18540445	20211	1294203	1124213358	33.84	32.86	39.3	200252	127765	72487	101.201	142.6	171100	156851	0.36	379.942	0.0498915	29579.4	1.8941e+06	293074	186988	106087	35	30	18	94	139679	32.6804	0.977199	1.02728	-1.00116	11.775	0.754214	11.9476	0.42333
2012-06-01	16694592	18754	1315661	1144670131	32.93	31.06	38.24	195940	124986	70954	101.269	143.54	173329	159285	0.08	380.246	0.0491577	27425.1	1.92397e+06	286534	182774	103760	35	30	16	83	120440	31.7628	0.97784	0.659187	-0.43984	10.7615	1.30269	10.917	1.55153
2012-07-01	16132884	17512	1320806	1150265168	32.29	30.65	38.59	188318	118542	69776	101.893	143.92	173920	161119	0.43	381.881	0.0519859	25499.2	1.92322e+06	274209	172609	101601	33	35	16	78	142496	31.7413	1.19533	0.264735	0.559675	10.1867	0.341316	10.267	1.15165
2012-08-01	17036918	18805	1332464	1162818885	31.66	30.07	38.03	195611	123034	72577	102.514	144.32	175711	163131	0.41	383.447	0.0524051	27270.1	1.93227e+06	283665	178418	105248	36	28	17	77	100938	31.1567	1.70543	0.277932	1.18511	9.93077	1.02932	10.0194	1.24858
2012-09-01	13470584	14812	1344794	1172915666	31.44	29.93	37.76	176227	113123	63104	102.555	143.7	178286	165625	0.57	385.633	0.0528239	21357.9	1.9391e+06	254107	163116	90991.7	34	30	15	75	150334	30.8481	1.34706	-0.429601	1.84312	10.4703	1.46553	10.5607	1.52902
2012-10-01	16991111	18468	1355892	1183115575	30.74	29.35	37.81	200960	127947	73013	102.248	144.96	178951	166338	0.59	387.908	0.0545012	26473.4	1.94364e+06	288071	183409	104662	33	27	16	76	66988	30.6874	2.2862	0.876827	2.36387	11.7979	0.373333	11.9892	0.430067
2012-11-01	15673619	16887	1370604	1193645170	30.58	28.92	37.12	191044	121554	69490	102.605	144.58	182173	168673	0.6	390.235	0.0553404	24062.7	1.95301e+06	272223	173205	99018	36	28	15	74	46095	29.9296	1.65225	-0.262141	2.55371	11.7884	1.80049	11.9309	1.40395
2012-12-01	14177166	15093	1396241	1205701546	29.17	28.08	36.89	197710	130346	67364	102.603	144.18	189032	174333	0.79	393.318	0.0583857	21337.8	1.97394e+06	279514	184277	95236.3	29	28	12	62	-496944	29.3385	2.65575	-0.276663	2.25498	11.1049	3.76476	11.342	3.35578
2013-01-01		18551	1385371		29.87		37.38	181513	109799	71714	102.363	144.92	191442	175802	0.86	396.701	0.0615432	26003	1.94188e+06	254427	153905	100522	31	26	17	83	28900	29.4154	4.38666	0.513247	1.76127	10.5281	1.27529	10.795	0.842754
2013-02-01		17941	1388503		30.6		37.96	173519	105143	68376	103.076	143.84	189517	174881	0.6	399.081	0.0631283	24997.9	1.93466e+06	241771	146500	95271.1	32	35	16	77	123446	29.768	2.39909	-0.745239	1.24721	7.83852	-1.00599	7.98356	-0.524168
2013-03-01		19409	1407417		30.14		37.25	190065	118557	71508	103.358	144.95	183635	170033	0.47	400.957	0.0658867	26916.9	1.95184e+06	263587	164418	99169	33	26	18	76	112450	28.766	3.55051	0.771691	0.954343	9.41901	-3.10326	9.7643	-2.77229
2013-04-01		21272	1411352		30.24		36.9	200744	122985	77759	104.165	146.19	187057	172526	0.55	403.162	0.0649335	29339.1	1.94659e+06	276874	169626	107248	35	36	21	82	196913	28.5526	3.57067	0.855467	0.651187	10.1507	1.86331	10.4592	1.4666
2013-05-01		21290	1427448		29.99		36.78	210997	133771	77226	105.285	146.87	190250	175004	0.37	404.654	0.0650396	29255.7	1.96153e+06	289942	183822	106120	35	26	19	78	72028	28.4271	2.99439	0.465148	0.685533	11.1923	1.70691	11.5731	1.43601
2013-06-01		19715	1441075		30.43		38.07	198073	125314	72759	106.35	146.29	193404	177983	0.26	405.706	0.0669551	27021.2	1.97512e+06	271477	171754	99722.7	35	33	18	73	123836	29.4056	1.91584	-0.394907	0.854839	11.582	1.65777	11.7385	1.70202
2013-07-01		20031	1440430		31.22		39.8	196232	119561	76671	107.45	146.96	192994	179096	0.03	405.827	0.0627056	27446.1	1.97365e+06	268873	163820	105053	35	30	18	77	41463	31.551	2.11228	0.457994	0.973854	10.9669	-0.211836	11.1575	0.625735
2013-08-01		21179	1447717		31.75		39.77	198009	119762	78247	107.912	147.12	194453	180887	0.24	406.801	0.0609064	28949.5	1.97888e+06	270658	163702	106956	36	37	16	76	127648	31.7458	1.94013	0.108873	1.40848	10.6664	0.755722	10.8844	0.999853
2013-09-01		18527	1460987		32.04		40.41	199564	124345	75219	108.027	148.13	197395	183901	0.35	408.225	0.0585856	25236.2	1.99006e+06	271832	169374	102458	36	39	18	78	211068	32.6392	3.08281	0.686514	1.62895	10.7185	1.51332	11.0342	1.66618
2013-10-01		19669	1462303		32.66		42.29	207771	128255	79516	108.169	148.21	198902	185417	0.57	410.552	0.0583751	26639.9	1.98056e+06	281407	173710	107697	38	37	17	78	94893	34.4419	2.242	0.0540066	1.71759	11.1487	0.763341	11.4703	0.82452
2013-11-01		18107	1479882		33.14		41.78	200534	124309	76225	108.489	148.36	201875	187411	0.54	412.769	0.0577439	24392.6	1.9936e+06	270147	167461	102685	36	37	15	75	47486	34.04	2.61447	0.101208	1.62122	10.8148	1.49465	11.109	1.07525
2013-12-01		17414	1505569		32.68		41.37	221166	143223	77943	107.891	148.74	208339	192487	0.92	416.567	0.0591082	23245.2	2.00972e+06	295225	191182	104043	32	31	14	67	-449444	33.4802	3.16271	0.256134	1.65624	10.2138	3.20203	10.4132	2.70849
2014-01-01		19085	1488825		34.29		43.04	189175	110936	78239	107.304	148.27	210892	193957	0.55	418.858	0.0558529	25336.4	1.9765e+06	251140	147274	103866	34	33	18	87	29595	35.4734	2.31162	-0.315988	1.56896	10.1596	1.22545	10.3269	0.763948
2014-02-01		22109	1489636		35.65		44.2	194915	113868	81047	108.668	147.86	210780	194900	0.69	421.748	0.0567975	29149.8	1.96402e+06	256987	150130	106857	38	31	20	82	260823	36.45	2.79477	-0.276523	1.27394	11.2201	-0.0530128	11.4472	0.485931
2014-03-01		18778	1500164		35.82		43.95	201792	123928	77864	109.532	147.84	205097	190236	0.92	425.628	0.0615309	24532.3	1.95987e+06	263629	161904	101724	37	36	20	80	13117	35.606	1.99379	-0.0135263	0.87572	11.6872	-2.69626	11.8818	-2.39307
2014-04-01		19941	1501489		35.73		45.29	202341	122747	79594	110.136	146.97	206880	191208	0.67	428.48	0.0627978	25878.3	1.94855e+06	262586	159294	103293	37	34	20	77	105384	36.7052	0.533552	-0.588474	0.504765	10.5973	0.869246	10.828	0.510892
2014-05-01		20526	1511593		36.01		45	206483	125790	80693	110.202	146.22	206408	190060	0.46	430.451	0.0637507	26515.5	1.95268e+06	266735	162496	104239	38	34	19	81	58836	36.3101	-0.442568	-0.510308	0.0937779	8.49309	-0.228151	8.603	-0.600447
2014-06-01		19994	1522571		36.24		45.67	206553	127640	78913	108.643	143.56	206135	189676	0.4	432.172	0.0652361	25725.4	1.95902e+06	265762	164228	101534	36	30	16	71	25363	36.749	-1.86616	-1.81918	-0.76618	6.5826	-0.132359	6.5698	-0.201989
2014-07-01		19774	1515198		36.46		45.93	195304	115670	79634	107.237	144.64	207622	192652	0.01	432.216	0.0650231	25439.7	1.94934e+06	251263	148812	102451	36	31	18	81	11796	37.0205	-1.57866	0.752299	-1.32084	7.57961	0.721615	7.56917	1.56936
2014-08-01		18250	1521363		36.55		45.52	191151	115060	76091	107.499	145.67	212480	197870	0.25	433.296	0.0651294	23420.5	1.95239e+06	245307	147658	97648.8	38	37	18	76	101425	36.6219	-0.98559	0.712113	-1.64911	9.27074	2.33958	9.3889	2.70845
2014-09-01		19094	1532310		36.1		44.49	206884	127595	79289	108.965	146.11	217982	203465	0.57	435.766	0.0674645	24364.8	1.95529e+06	263993	162817	101176	40	32	19	80	123785	35.3581	-1.36367	0.302053	-1.81158	10.4292	2.58956	10.6384	2.82751
2014-10-01		24718	1536735		37.3		46.08	208284	122511	85773	110.022	145.58	218587	204091	0.42	437.596	0.0658724	31409.3	1.95274e+06	264668	155675	108992	39	32	20	79	-30283	37.0521	-1.77451	-0.36274	-1.831	9.89692	0.277637	10.0712	0.307571
2014-11-01		20558	1550446		37.6		46.01	197292	118718	78574	109.889	145.65	223322	207530	0.51	439.828	0.0655543	25990.6	1.96016e+06	249428	150090	99337.8	42	38	19	78	8381	37.0273	-1.82664	0.0480835	-1.6582	10.6238	2.16595	10.7352	1.68498
2014-12-01		19273	1576287		36.84		45.41	226491	145520	80971	110.517	146.23	231657	214444	0.78	443.259	0.0640762	24177.5	1.97741e+06	284127	182551	101576	37	34	17	70	-555508	36.6538	-1.68751	0.398215	-0.776637	11.192	3.73215	11.4069	3.33152
2015-01-01		18674	1564503		38.81		47.1	187204	109945	77259	110.893	145.24	233228	214833	1.24	448.755	0.0713781	23139.1	1.93859e+06	231966	136234	95732.3	40	45	24	93	-81774	37.2998	-2.04357	-0.677016	-0.297575	10.5911	0.678375	10.7632	0.181726
2015-02-01		17584	1564684		40.29		47.47	172958	100002	72956	111.092	144.3	230728	213590	1.22	454.23	0.0770175	21525.9	1.91544e+06	211731	122420	89310.8	40	41	24	85	-2415	36.9244	-2.40768	-0.647205	-0.204595	9.46387	-1.07174	9.58938	-0.57896
2015-03-01		21033	1578749		40.49		46.53	214731	131371	83360	110.503	144	224018	207912	1.32	460.226	0.0812863	25412.6	1.90748e+06	259443	158726	100718	44	40	25	90	19282	35.5145	-2.5974	-0.2079	-0.24852	9.22538	-2.90827	9.29173	-2.65818
2015-04-01		18962	1575586		41.45		48.85	197913	119368	78545	110.748	142.41	225497	208358	0.71	463.493	0.081716	22748.8	1.89024e+06	237438	143207	94231	44	46	26	93	-97828	37.6054	-3.10267	-1.10417	-0.453096	8.99888	0.66008	8.9693	0.21437
2015-05-01		18600	1584384		42.36		48.82	195554	119084	76470	110.061	141.16	228679	210645	0.74	466.923	0.0847309	22150.6	1.88683e+06	232884	141816	91067.7	44	41	23	86	-115599	37.1953	-3.46054	-0.877747	-0.903341	10.7896	1.41097	10.8312	1.09792
2015-06-01		19041	1596084		43.19		49.05	208790	130552	78238	110.459	139.85	230201	212096	0.79	470.612	0.0889445	22498.1	1.88587e+06	246698	154255	92442.9	46	40	25	75	-111199	36.8757	-2.58429	-0.928025	-1.93619	11.6749	0.665694	11.8204	0.688741
2015-07-01		18211	1594184		44.14		49.95	193973	117262	76711	109.744	138.83	230472	214243	0.62	473.53	0.0955864	21384.8	1.87202e+06	227779	137698	90080.2	46	46	25	77	-157905	36.8673	-4.01687	-0.729353	-2.73648	11.0055	0.117854	11.2072	1.01242
2015-08-01		17887	1601273		45.13		50.94	186213	111441	74772	109.084	139.09	230400	214617	0.22	474.571	0.0952585	20958.2	1.87621e+06	218186	130576	87610.5	44	40	26	79	-86543	37.8122	-4.51706	0.187279	-3.18058	8.4336	-0.0315439	8.46327	0.174194
2015-09-01		18136	1610315		46.22		50.21	197295	122296	74999	108.91	137.98	231137	215534	0.54	477.134	0.0949318	21135.9	1.87668e+06	229929	142525	87404.5	47	47	29	74	-95602	37.1866	-5.5643	-0.798044	-3.6372	6.03499	0.320226	5.93148	0.427274
2015-10-01		14696	1602647		47.53		53.33	186996	114788	72208	108.395	138.95	236020	220530	0.82	481.047	0.0992932	16987.5	1.85255e+06	216154	132687	83467.4	45	39	27	70	-169131	39.4805	-4.5542	0.703	-3.6839	7.97507	2.11238	8.05504	2.31839
2015-11-01		16819	1614464		48.13		51.39	190654	115978	74676	107.57	136.94	247172	231580	1.01	485.905	0.104762	19247.2	1.84755e+06	218179	132722	85457.1	46	40	26	74	-130629	37.0341	-5.98009	-1.44656	-3.67179	10.6795	4.7249	11.5887	5.01037
2015-12-01		16270	1637145		46.89		50.79	214880	141470	73410	107.026	136.39	267499	250238	0.96	490.57	0.106735	18441.9	1.85569e+06	243564	160355	83209.5	41	38	23	67	-596208	36.2476	-6.72913	-0.401636	-3.35838	15.4724	8.22416	16.6915	8.05666
2016-01-01		15119	1614493		49.44		51.31	163214	95249	67965	106.597	135.68	265387	247173	1.27	496.8	0.107063	16922.3	1.80706e+06	182681	106610	76071.6	40	35	29	79	-99694	36.677	-6.58221	-0.520566	-3.00041	13.7885	-0.789796	15.0535	-1.22452
2016-02-01		16203	1602847		50.57		52.41	168897	97125	71772	106.019	135.62	261100	243247	0.9	501.271	0.103563	17973.9	1.77803e+06	187356	107740	79616.1	43	40	29	81	-104582	38.1072	-6.01525	-0.0442217	-2.81307	13.1635	-1.61508	13.8851	-1.5886
2016-03-01		17278	1591966		50.8		53.44	189987	115707	74280	106.242	134.62	242770	226286	0.43	503.427	0.0938693	19084.3	1.75839e+06	209849	127803	82045.4	43	50	32	79	-118776	40.2727	-6.51389	-0.737354	-2.51632	8.37048	-7.02059	8.83763	-6.97243
2016-04-01		16531	1576823		51.97		54.41	174374	103134	71240	105.825	134.49	245499	227707	0.61	506.498	0.0927831	18148.5	1.73111e+06	191436	113225	78210.5	45	46	34	78	-62844	41.2998	-5.56141	-0.0965681	-2.64638	8.87027	1.12432	9.28672	0.627877
2016-05-01		17284	1580332		51.9		54.24	183715	109369	74346	106.393	134.12	245662	227042	0.78	510.448	0.093217	18828.3	1.72153e+06	200130	119141	80988.7	43	44	29	75	-72615	41.0882	-4.98725	-0.275113	-2.49146	7.42649	0.0661102	7.78422	-0.291998
2016-06-01		18183	1568993		51.73		53.4	187038	112379	74659	105.259	134.59	248502	229782	0.35	512.235	0.0884446	19738.5	1.70322e+06	203039	121993	81046	44	39	30	70	-91032	40.9351	-3.76117	0.350432	-2.30143	7.94997	1.15623	8.33853	1.20656
2016-07-01		16667	1554097		52.36		53.8	162938	92575	70363	105.334	134.25	250642	233883	0.52	514.898	0.0873628	17999.3	1.67832e+06	175962	99974.9	75987.4	41	36	27	69	-94724	41.4431	-3.299	-0.252619	-2.10174	8.75138	0.86112	9.16714	1.785
2016-08-01		17970	1549534		52.83		53.7	174298	99120	75178	105.725	133.54	252161	235696	0.44	517.164	0.0897498	19321.4	1.66606e+06	187406	106574	80831.6	41	44	28	68	-33953	41.0416	-3.99022	-0.528864	-1.94143	9.4452	0.606244	9.82189	0.775002
2016-09-01		14248	1547413		53.26		54.18	176195	106933	69262	105.103	133.68	256014	239700	0.08	517.578	0.0847639	15307.2	1.66245e+06	189294	114883	74411.2	43	45	28	73	-39282	42.1323	-3.11639	0.104838	-1.65363	10.7627	1.52791	11.2121	1.69859
2016-10-01		16134	1543249		53.88		54.61	171011	98227	72784	104.982	133.38	257284	240934	0.26	518.923	0.0787386	17288.5	1.65368e+06	183248	105256	77992.2	44	47	29	75	-74748	43.3248	-4.00864	-0.224417	-1.25101	9.00924	0.495832	9.25223	0.515228
2016-11-01		16147	1548045		53.79		54.5	178275	104347	73928	105.367	133.18	268584	250891	0.18	519.858	0.0698746	17271.3	1.65584e+06	190689	111613	79075.7	47	47	31	71	-116747	44.4095	-2.74573	-0.149948	-1.02353	8.66293	4.3922	8.33872	4.13233
2016-12-01		15252	1556634		51.77		54.22	194403	122233	72170	106.403	132.29	286159	266534	0.3	521.417	0.0628806	16265.2	1.66005e+06	207318	130353	76964.4	42	40	26	63	-462366	45.0963	-3.00609	-0.668269	-1.0876	6.9756	6.54365	6.51257	6.23526
2017-01-01		17032	1533614		52.82		54.17	167194	93597	73597	106.339	133.59	287651	266848	0.38	523.399	0.0535395	18094.7	1.6293e+06	177626	99437	78189.1	44	39	36	84	-40864	46.3353	-1.54039	0.98269	-0.994193	8.38942	0.521388	7.95988	0.117658
2017-02-01		17099	1530906		53.04		54.14	148957	82915	66042	106.684	136.04	280318	261040	0.33	525.126	0.0475879	18106.2	1.62108e+06	157731	87798.8	69931.9	45	48	35	83	35612	47.138	0.309689	1.83397	-0.428247	7.36	-2.54948	7.31488	-2.17656
2017-03-01		19861	1535433		52.09		52.42	198558	115736	82822	106.91	135.66	261136	243459	0.25	526.439	0.0457103	20978.4	1.62182e+06	209729	122247	87481.6	47	58	37	81	-63624	45.7574	0.772545	-0.27933	-0.0658655	7.56524	-6.84285	7.58888	-6.73491
2017-04-01		17435	1525775		48.93		50.21	160581	89270	71311	107.23	135.36	262530	243058	0.14	527.176	0.0408253	18390.2	1.60936e+06	169378	94160.5	75217.7	48	47	46	74	59856	44.3182	0.646888	-0.221141	0.318582	6.93709	0.533784	6.74146	-0.164709
2017-05-01		22925	1522580		47.29		50.41	187306	101831	85475	107.431	134.93	265179	244729	0.31	528.81	0.0359713	24106.2	1.60103e+06	196957	107078	89879	48	51	44	73	34254	45.1874	0.603937	-0.317671	0.654108	7.94492	1.00918	7.79	0.687449
2017-06-01		21608	1531962		46.18		48.61	197103	116783	80320	107.836	135.92	268039	247278	-0.23	527.594	0.0299836	22773.7	1.61461e+06	207736	123083	84653.1	47	49	46	77	9821	44.2838	0.988186	0.733714	1.39694	7.86191	1.07844	7.61431	1.0416
2017-07-01		19204	1522137		46.61		50.57	167241	90361	76880	108.577	136.27	269325	250945	0.24	528.86	0.0271146	20191.6	1.60041e+06	175841	95007.8	80833.5	46	50	45	89	35900	46.5951	1.50466	0.257504	1.81577	7.45418	0.479856	7.29475	1.48274
2017-08-01		21060	1527126		45.55		49.41	186383	105772	80611	108.587	135.37	270272	252199	0.19	529.865	0.024558	22101	1.60261e+06	195596	111000	84595.7	48	48	50	83	35457	45.8287	1.37038	-0.660454	1.41493	7.18235	0.351731	7.00177	0.499831
2017-09-01		18780	1529595		43.3		48.46	178660	101924	76736	109.083	135.74	274768	256688	0.16	530.712	0.025377	19676.8	1.60264e+06	187192	106791	80400.5	49	63	50	77	34392	44.7858	1.54099	0.273325	1.17517	7.32553	1.66354	7.08721	1.77979
2017-10-01		20476	1537308		43.59		49.12	185320	103044	82276	109.413	136.03	276788	258665	0.42	532.941	0.0270134	21364.1	1.60398e+06	193358	107513	85844.5	50	53	50	76	76599	45.1977	1.9868	0.213644	1.00978	7.58113	0.735164	7.35901	0.770353
2017-11-01		20320	1553784		42.76		47.38	190037	106806	83231	110.013	136.13	286490	267314	0.28	534.434	0.0280385	21142.1	1.61665e+06	197726	111127	86598.4	54	56	53	83	-12292	43.3604	2.21505	0.0735132	0.939508	6.66674	3.50491	6.54616	3.3439
2017-12-01		19772	1584664		40.32		44.25	213288	134390	78898	110.002	137.81	304889	284207	0.44	536.785	0.0294735	20481.8	1.64155e+06	220945	139215	81730.5	50	58	50	75	-328539	40.1202	4.17265	1.23411	0.720887	6.54524	6.42229	6.6304	6.31926
2018-01-01		22684	1571363		41.08		46.16	184409	99553	84856	110.144	136.94	305046	283450	0.29	538.342	0.0285505	23430.4	1.62307e+06	190477	102829	87648.2	56	63	64	92	77822	42.1029	2.50767	-0.631304	0.47164	6.04722	0.051527	6.22133	-0.266426
2018-02-01		20123	1569398		42.17		46.92	182242	103904	78338	110.639	136.89	293373	273145	0.32	540.064	0.028448	20718.9	1.61587e+06	187638	106981	80657.7	56	62	64	82	61188	42.856	0.624816	-0.0365123	0.741232	4.65736	-3.82667	4.63734	-3.63532
2018-03-01		22615	1590542		41.46		46.75	204278	119241	85037	108.94	136.47	273711	254963	0.09	540.551	0.0268066	23263.7	1.63617e+06	210138	122661	87476.3	58	63	62	84	56151	42.9188	0.597081	-0.306816	0.821052	4.81543	-6.70215	4.72506	-6.65672
2018-04-01		23042	1601002		40.84		46.56	203153	118018	85135	109.93	137.3	274116	253378	0.22	541.74	0.0276268	23650.9	1.64331e+06	208522	121137	87384.8	63	73	65	91	115898	42.6199	1.43322	0.608192	0.894063	4.41352	0.148295	4.24586	-0.621542
2018-05-01		24954	1615649		39.11		44.21	198891	114194	84697	109.925	133.07	275136	254065	0.4	543.907	0.0285489	25511.4	1.65174e+06	203334	116745	86588.9	67	79	66	80	33659	40.2072	-1.37849	-3.08084	0.370343	3.75482	0.371959	3.815	0.271294
2018-06-01		24476	1640373		38.52		43.93	211136	126754	84382	110.334	137.3	276932	254804	1.26	550.76	0.0439096	24711.4	1.65615e+06	213166	127973	85193.4	65	76	67	72	-661	37.8759	1.0153	3.17878	0.0758549	3.31784	0.652732	3.0435	0.290713
2018-07-01		24571	1638532		38.06		44.55	199877	114286	85591	110.722	137.8	280092	260541	0.33	552.577	0.0448468	24725.7	1.64885e+06	201135	115005	86129.8	68	79	67	76	47319	38.3456	1.12277	0.364166	0.0990196	3.99792	1.14125	3.82423	2.25165
2018-08-01		26626	1664167		37.85		44.89	212835	124629	88206	111.326	138.42	282137	262229	-0.09	552.08	0.0419268	26817.8	1.67615e+06	214368	125527	88841.3	72	86	67	84	110431	39.0597	2.25308	0.449927	0.100056	4.38987	0.729937	3.9769	0.647613
2018-09-01		22610	1678731		37.92		45.02	197423	118134	79289	111.472	138.23	286502	267325	0.48	554.73	0.0452556	22664.1	1.68274e+06	197895	118416	79478.5	71	89	71	79	137336	38.7412	1.83439	-0.137263	0.225535	4.27032	1.54712	4.14426	1.94361
2018-10-01		27121	1682832		37.97		45.62	214782	124109	90673	111.552	138.1	287804	268535	0.45	557.226	0.0455679	27064	1.6793e+06	214331	123848	90482.6	71	91	75	73	57733	39.2736	1.52172	-0.0940462	0.167977	3.97961	0.454307	3.81563	0.45237
2018-11-01		24629	1714824		37.88		45.17	211047	121177	89870	111.743	138.47	298378	278163	-0.21	556.056	0.0404589	24629	1714824	211047	121177	89870	75	93	77	77	58664	39.525	1.71895	0.267922	1.20223	4.14978	3.67431	4.05844	3.58561
2018-12-01		24593					41.71					138.76			0.15	556.89	0.0374548	24556.2					72	88	72	80		36.5939	0.689355	0.209432	1.44382
2019-01-01		27536					43.8					138.19			0.32	558.672	0.0377652	27407.1					80	95	97	92		38.567	0.912809	-0.410781	1.3849
2019-02-01		26776					45.33								0.43	561.075	0.0389031	26536.5							100	84		39.8879
2019-03-01															0.75	565.283	0.0457537								94	80

## Sheet: Plan3
	cr_fin_total.interest_over_time.hits	cr_emp_total.interest_over_time.hits
cr_cred_total.interest_over_time.hits
1	95	70	35
2	86	52	30
3	86	55	26
4	77	54	34
5	100	63	48
6	87	63	29
7	75	65	25
8	69	58	21
9	77	52	25
10	81	55	32
11	84	64	23
12	67	55	42
13	81	72	40
14	61	70	28
15	74	53	34
16	70	56	41
17	67	58	41
18	73	59	38
19	59	59	35
20	61	63	38
21	65	56	27
22	66	59	38
23	69	68	32
24	56	50	28
25	54	68	33
26	50	53	26
27	60	58	32
28	53	53	34
29	58	53	31
30	52	51	34
31	47	60	25
32	51	55	25
33	52	57	22
34	51	59	21
35	52	64	22
36	39	51	20
37	41	64	26
38	45	59	27
39	49	60	26
40	49	61	22
41	49	70	27
42	46	62	26
43	47	70	29
44	49	64	28
45	48	67	23
46	46	71	24
47	48	69	24
48	38	62	22
49	43	86	27
50	44	81	24
51	41	79	26
52	46	73	24
53	46	75	25
54	48	69	26
55	43	72	24
56	43	65	23
57	47	73	26
58	43	65	22
59	46	67	21
60	36	64	20
61	36	91	22
62	37	84	23
63	42	89	25
64	43	95	22
65	41	87	20
66	41	79	19
67	38	80	16
68	36	84	17
69	40	88	19
70	37	82	17
71	40	83	17
72	34	78	14
73	33	100	14
74	35	98	18
75	38	93	18
76	39	94	20
77	40	91	19
78	35	82	18
79	36	88	14
80	37	86	18
81	38	82	16
82	34	81	14
83	37	88	16
84	32	82	14
85	32	90	17
86	34	88	19
87	34	81	17
88	35	81	18
89	38	77	17
90	37	74	16
91	34	75	15
92	36	77	15
93	35	76	14
94	37	72	14
95	36	75	14
96	30	66	12
97	31	85	15
98	32	81	15
99	34	80	18
100	35	90	22
101	35	94	18
102	34	83	16
103	33	78	16
104	34	77	17
105	34	75	15
106	32	76	16
107	35	74	15
108	29	62	12
109	31	83	17
110	32	77	16
111	31	76	18
112	35	82	21
113	34	78	19
114	34	73	18
115	34	77	18
116	37	76	16
117	36	78	18
118	36	78	17
119	35	75	15
120	33	67	14
121	34	87	18
122	37	82	20
123	35	80	20
124	36	77	20
125	38	81	19
126	35	71	16
127	35	81	18
128	37	76	18
129	40	80	19
130	38	79	20
131	42	78	19
132	37	70	17
133	39	93	24
134	40	85	24
135	43	90	25
136	43	93	26
137	43	86	23
138	45	75	25
139	45	77	25
140	44	79	26
141	45	74	29
142	44	70	27
143	44	74	26
144	41	67	23
145	40	79	29
146	42	81	29
147	43	79	32
148	43	78	34
149	42	75	29
150	44	70	30
151	40	69	27
152	41	68	28
153	41	73	28
154	42	75	29
155	45	71	31
156	40	63	26
157	44	84	36
158	44	83	35
159	47	81	37
160	47	74	46
161	46	73	44
162	45	77	46
163	44	89	45
164	48	83	50
165	48	77	50
166	49	76	50
167	54	83	53
168	50	75	50
169	55	92	64
170	55	82	64
171	58	84	62
172	61	91	65
173	65	80	66
174	64	72	67
175	67	76	67
176	71	84	67
177	69	79	71
178	69	73	75
179	72	77	77
180	72	80	72
181	79	92	97
182	79	84	100
183	79	80	94
184	84	84	94

## Sheet: projeção t+1
	l_credl0	RW	AR(1)	SSM - factor model with AR(1) for states	SSM - factor model with AR(1) for states and threshold for stochastic volatility	SSM - factor model with AR(1) for states and regime switch			RW	AR(1)	SSM - factor model with AR(1) for states	SSM - factor model with AR(1) for states and threshold for stochastic volatility	SSM - factor model with AR(1) for states and regime switch
2018-02-01	1.0428	1.20241	1.18467	1.08235	1.09165	1.08799			0.025476	0.0201277	0.00156404	0.00238632	0.00204223
2018-03-01	1.05394	1.0428	1.02769	1.06643	1.06534	1.14607			0.000124077	0.000689063	0.000155975	0.00013012	0.00848794
2018-04-01	1.14475	1.05394	1.03885	1.05779	1.04389	1.05779			0.00824682	0.0112144	0.00756274	0.0101735	0.00756274
2018-05-01	1.24495	1.14475	1.12839	1.09519	1.13731	1.18064			0.0100402	0.0135869	0.0224296	0.011587	0.00413642
2018-06-01	1.18128	1.24495	1.22741	1.16502	1.21173	1.24465			0.00405438	0.00212788	0.00026429	0.000927507	0.00401652
2018-07-01	1.32159	1.18128	1.16488	1.16869	1.17	1.25022			0.0196875	0.024558	0.023379	0.0229792	0.00509339
2018-08-01	1.40996	1.32159	1.30356	1.22934	1.25028	1.295			0.00780926	0.0113201	0.0326221	0.0254967	0.013216
2018-09-01	1.37992	1.40996	1.39132	1.30657	1.29656	1.33607			0.000902522	0.000130142	0.00537964	0.00694756	0.00192238
2018-10-01	1.55083	1.37992	1.36191	1.34006	1.34823	1.34713			0.0292116	0.0356893	0.0444236	0.0410484	0.0414937
2018-11-01	1.46777	1.55083	1.53169	1.43542	1.42986	1.42708			0.00689963	0.00408564	0.001046	0.00143724	0.00165568
2018-12-01	1.52581	1.46777	1.44955	1.44426	1.44196	1.4676			0.00336922	0.00581528	0.00665105	0.00703149	0.00338899
2019-01-01	1.59204	1.52581	1.50749	1.47927	1.47464	1.51169			0.00438668	0.0071487	0.0127171	0.0137837	0.00645644
2019-02-01	1.66016	1.59204	1.57367	1.53137	1.55032	1.50276			0.00464033	0.00748173	0.0165879	0.0120664	0.0247751
									0.00960371	0.011075	0.0134448	0.0119996	0.0095575

## Sheet: projeção t+2
	l_credl0	RW	AR(1)	SSM - factor model with AR(1) for states	SSM - factor model with AR(1) for states and threshold for stochastic volatility	SSM - factor model with AR(1) for states and regime switch			RW	AR(1)	SSM - factor model with AR(1) for states	SSM - factor model with AR(1) for states and threshold for stochastic volatility	SSM - factor model with AR(1) for states and regime switch
2018-02-01	1.0428	NA	NA	NA	NA	NA
2018-03-01	1.05394	1.20241	1.18467	1.08235	1.09165	1.08799			0.0220442	0.0170911	0.000807071	0.00142212	0.00115954
2018-04-01	1.14475	1.0428	1.02769	1.06643	1.06534	1.14607			0.010394	0.0137035	0.00613449	0.00630515	1.73712e-06
2018-05-01	1.24495	1.05394	1.03885	1.05779	1.04389	1.05779			0.036486	0.0424768	0.0350307	0.0404271	0.0350307
2018-06-01	1.18128	1.14475	1.12839	1.09519	1.13731	1.18064			0.00133422	0.00279725	0.00741166	0.00193327	4.10881e-07
2018-07-01	1.32159	1.24495	1.22741	1.16502	1.21173	1.24465			0.00587338	0.00887044	0.0245139	0.0120686	0.00591915
2018-08-01	1.40996	1.18128	1.16488	1.16869	1.17	1.25022			0.0522955	0.0600642	0.0582122	0.0575803	0.0255162
2018-09-01	1.37992	1.32159	1.30356	1.22934	1.25028	1.295			0.00340216	0.00582993	0.0226725	0.0168052	0.00721124
2018-10-01	1.55083	1.40996	1.39132	1.30657	1.29656	1.33607			0.0198449	0.0254422	0.0596629	0.0646512	0.0461214
2018-11-01	1.46777	1.37992	1.36191	1.34006	1.34823	1.34713			0.00771762	0.0112046	0.0163086	0.0142898	0.014553
2018-12-01	1.52581	1.55083	1.53169	1.43542	1.42986	1.42708			0.00062595	3.45039e-05	0.00816981	0.00920755	0.0097486
2019-01-01	1.59204	1.46777	1.44955	1.44426	1.44196	1.4676			0.0154448	0.0203034	0.0218407	0.0225258	0.0154871
2019-02-01	1.66016	1.52581	1.50749	1.47927	1.47464	1.51169			0.0180505	0.0233081	0.0327212	0.0344192	0.0220439
									0.0161261	0.0192605	0.0244571	0.0234696	0.0152328

## Sheet: projeção t+3
	l_credl0	RW	AR(1)	SSM - factor model with AR(1) for states	SSM - factor model with AR(1) for states and threshold for stochastic volatility	SSM - factor model with AR(1) for states and regime switch
2018-02-01	1.0428	NA	NA	NA	NA	NA
2018-03-01	1.05394	NA	NA	NA	NA	NA											X	1.0428	NA	NA	NA	NA	NA
2018-04-01	1.14475	1.20241	1.18467	1.08235	1.09165	1.08799			0.00332479	0.00159369	0.00389413	0.00281972	0.0032217				X.1	1.05394	NA	NA	NA	NA	NA
2018-05-01	1.24495	1.0428	1.02769	1.06643	1.06534	1.14607			0.0408654	0.0472032	0.0318708	0.0322583	0.00977785				result.1	1.14475	1.20241	1.18467	1.08235	1.09165	1.08799
2018-06-01	1.18128	1.05394	1.03885	1.05779	1.04389	1.05779			0.0162152	0.0202849	0.01525	0.0188763	0.01525				result.2	1.24495	1.0428	1.02769	1.06643	1.06534	1.14607
2018-07-01	1.32159	1.14475	1.12839	1.09519	1.13731	1.18064			0.031272	0.0373266	0.0512583	0.0339595	0.0198677				result.3	1.18128	1.05394	1.03885	1.05779	1.04389	1.05779
2018-08-01	1.40996	1.24495	1.22741	1.16502	1.21173	1.24465			0.0272276	0.0333256	0.0599951	0.0392939	0.0273261				result.4	1.32159	1.14475	1.12839	1.09519	1.13731	1.18064
2018-09-01	1.37992	1.18128	1.16488	1.16869	1.17	1.25022			0.0394578	0.0462413	0.0446181	0.0440651	0.0168211				result.5	1.40996	1.24495	1.22741	1.16502	1.21173	1.24465
2018-10-01	1.55083	1.32159	1.30356	1.22934	1.25028	1.295			0.0525519	0.0611415	0.103355	0.0903297	0.0654505				result.6	1.37992	1.18128	1.16488	1.16869	1.17	1.25022
2018-11-01	1.46777	1.40996	1.39132	1.30657	1.29656	1.33607			0.00334176	0.00584338	0.0259842	0.0293101	0.0173436				result.7	1.55083	1.32159	1.30356	1.22934	1.25028	1.295
2018-12-01	1.52581	1.37992	1.36191	1.34006	1.34823	1.34713			0.0212854	0.0268622	0.0345031	0.0315364	0.0319269				result.8	1.46777	1.40996	1.39132	1.30657	1.29656	1.33607
2019-01-01	1.59204	1.55083	1.53169	1.43542	1.42986	1.42708			0.00169851	0.00364309	0.0245295	0.0263049	0.0272141				result.9	1.52581	1.37992	1.36191	1.34006	1.34823	1.34713
2019-02-01	1.66016	1.46777	1.44955	1.44426	1.44196	1.4676			0.0370166	0.0443566	0.0466154	0.0476139	0.037082				result.10	1.59204	1.55083	1.53169	1.43542	1.42986	1.42708
																	result.11	1.66016	1.46777	1.44955	1.44426	1.44196	1.4676
									0.0261713	0.0310914	0.041192	0.0358277	0.0229984

## Sheet: projeção t+4
	l_credl0	RW	AR(1)	SSM - factor model with AR(1) for states	SSM - factor model with AR(1) for states and threshold for stochastic volatility	SSM - factor model with AR(1) for states and regime switch
2018-02-01	1.0428	NA	NA	NA	NA	NA
2018-03-01	1.05394	NA	NA	NA	NA	NA
2018-04-01	1.14475	NA	NA	NA	NA	NA
2018-05-01	1.24495	1.20241	1.18467	1.08235	1.09165	1.08799			0.00180965	0.00363368	0.0264401	0.0235015	0.0246368
2018-06-01	1.18128	1.0428	1.02769	1.06643	1.06534	1.14607			0.0191762	0.0235896	0.0131905	0.0134402	0.00123967
2018-07-01	1.32159	1.05394	1.03885	1.05779	1.04389	1.05779			0.0716371	0.0799402	0.069592	0.077119	0.069592
2018-08-01	1.40996	1.14475	1.12839	1.09519	1.13731	1.18064			0.0703358	0.0792822	0.099082	0.0743386	0.052589
2018-09-01	1.37992	1.24495	1.22741	1.16502	1.21173	1.24465			0.0182158	0.0232596	0.0461807	0.0282862	0.0182963
2018-10-01	1.55083	1.18128	1.16488	1.16869	1.17	1.25022			0.13657	0.148959	0.146034	0.145032	0.0903664
2018-11-01	1.46777	1.32159	1.30356	1.22934	1.25028	1.295			0.021368	0.026963	0.056846	0.0472997	0.0298491
2018-12-01	1.52581	1.40996	1.39132	1.30657	1.29656	1.33607			0.0134219	0.0180868	0.0480666	0.0525542	0.0360013
2019-01-01	1.59204	1.37992	1.36191	1.34006	1.34823	1.34713			0.0449979	0.0529594	0.0634949	0.0594467	0.0599824
2019-02-01	1.66016	1.55083	1.53169	1.43542	1.42986	1.42708			0.0119537	0.0165066	0.0505076	0.0530418	0.0543295
									0.0441703	0.0507415	0.0632141	0.0578909	0.0425059

## Sheet: projeção t+5
	l_credl0	RW	AR(1)	SSM - factor model with AR(1) for states	SSM - factor model with AR(1) for states and threshold for stochastic volatility	SSM - factor model with AR(1) for states and regime switch
2018-02-01	1.0428	NA	NA	NA	NA	NA
2018-03-01	1.05394	NA	NA	NA	NA	NA
2018-04-01	1.14475	NA	NA	NA	NA	NA
2018-05-01	1.24495	NA	NA	NA	NA	NA
2018-06-01	1.18128	1.20241	1.18467	1.08235	1.09165	1.08799			0.000446646	1.15192e-05	0.00978714	0.00803318	0.00870246
2018-07-01	1.32159	1.0428	1.02769	1.06643	1.06534	1.14607			0.0777239	0.0863778	0.0651076	0.065661	0.0308076
2018-08-01	1.40996	1.05394	1.03885	1.05779	1.04389	1.05779			0.126751	0.13772	0.124026	0.134009	0.124026
2018-09-01	1.37992	1.14475	1.12839	1.09519	1.13731	1.18064			0.0553035	0.0632668	0.0810717	0.0588591	0.0397129
2018-10-01	1.55083	1.24495	1.22741	1.16502	1.21173	1.24465			0.0935626	0.104604	0.14885	0.114988	0.093745
2018-11-01	1.46777	1.18128	1.16488	1.16869	1.17	1.25022			0.0820765	0.0917411	0.0894488	0.0886652	0.0473263
2018-12-01	1.52581	1.32159	1.30356	1.22934	1.25028	1.295			0.041707	0.0493946	0.0878939	0.0759168	0.0532751
2019-01-01	1.59204	1.40996	1.39132	1.30657	1.29656	1.33607			0.0331549	0.0402881	0.0814948	0.0873078	0.0655217
2019-02-01	1.66016	1.37992	1.36191	1.34006	1.34823	1.34713			0.0785384	0.0889525	0.102465	0.0973047	0.0979897
									0.0654738	0.0735952	0.0877939	0.0811939	0.0623452

## Sheet: projeção t+6
	l_credl0	RW	AR(1)	SSM - factor model with AR(1) for states	SSM - factor model with AR(1) for states and threshold for stochastic volatility	SSM - factor model with AR(1) for states and regime switch
2018-02-01	1.0428	NA	NA	NA	NA	NA
2018-03-01	1.05394	NA	NA	NA	NA	NA
2018-04-01	1.14475	NA	NA	NA	NA	NA
2018-05-01	1.24495	NA	NA	NA	NA	NA
2018-06-01	1.18128	NA	NA	NA	NA	NA
2018-07-01	1.32159	1.20241	1.18467	1.08235	1.09165	1.08799			0.0142034	0.0187465	0.0572367	0.0528724	0.0545685
2018-08-01	1.40996	1.0428	1.02769	1.06643	1.06534	1.14607			0.134806	0.146131	0.118014	0.118759	0.0696385
2018-09-01	1.37992	1.05394	1.03885	1.05779	1.04389	1.05779			0.106262	0.116325	0.103768	0.112917	0.103768
2018-10-01	1.55083	1.14475	1.12839	1.09519	1.13731	1.18064			0.164902	0.178458	0.207612	0.171001	0.137044
2018-11-01	1.46777	1.24495	1.22741	1.16502	1.21173	1.24465			0.049647	0.0577734	0.0916557	0.0655539	0.0497799
2018-12-01	1.52581	1.18128	1.16488	1.16869	1.17	1.25022			0.118704	0.130273	0.127538	0.126602	0.0759504
2019-01-01	1.59204	1.32159	1.30356	1.22934	1.25028	1.295			0.0731459	0.0832213	0.131552	0.116801	0.0882363
2019-02-01	1.66016	1.40996	1.39132	1.30657	1.29656	1.33607			0.0626025	0.0722744	0.125028	0.132204	0.105036
									0.0905342	0.1004	0.120301	0.112089	0.0855027
