# Supplementary material for: What does Google say about credit developments in Brazil?
Source: publisher site journal article supplement (doi:10.1515/snde-2019-0122), 2021-08-30
Supplement: Supplementary file 12 [file j_snde-2019-0122_suppl.zip]

**Answer letter to the reviewers' comments on the paper:  
“What Does Google Say about Credit Developments in Brazil?”**

**Dear Anonymous Referees**

We would like to thank you for the valuable comments and suggestions that contributed to improve the quality of the paper. We are very satisfied with the result so far and believe that the last version of the paper is much better and meet the referees suggestions.

The Authors.
