# Supplementary figures and images for: What does Google say about credit developments in Brazil?
Source: publisher site journal article supplement (doi:10.1515/snde-2019-0122), 2021-08-30

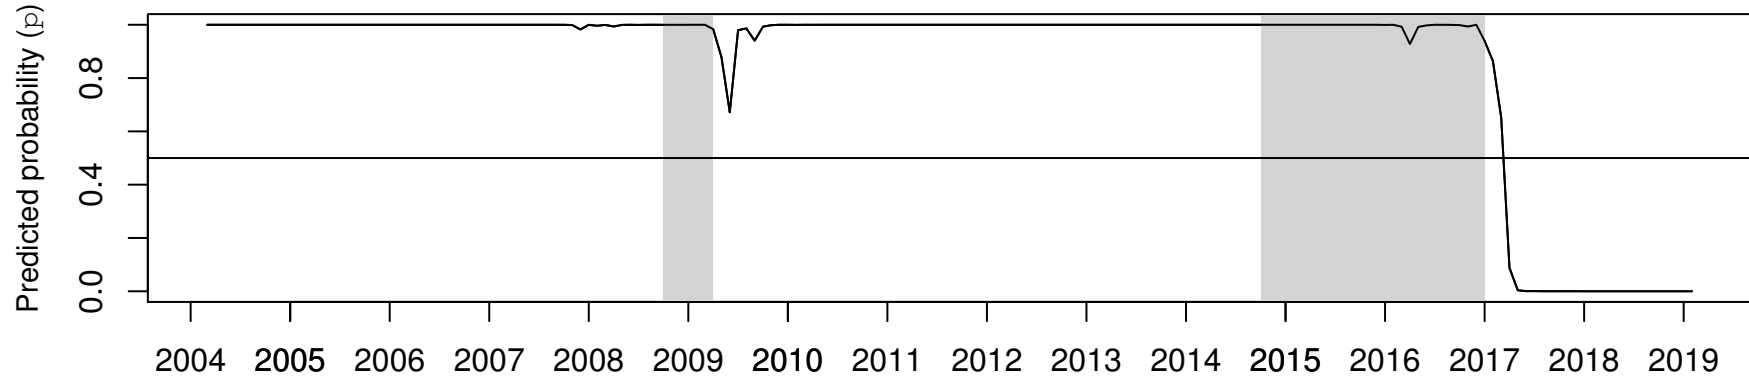

(a) DSSMS/E/DR model

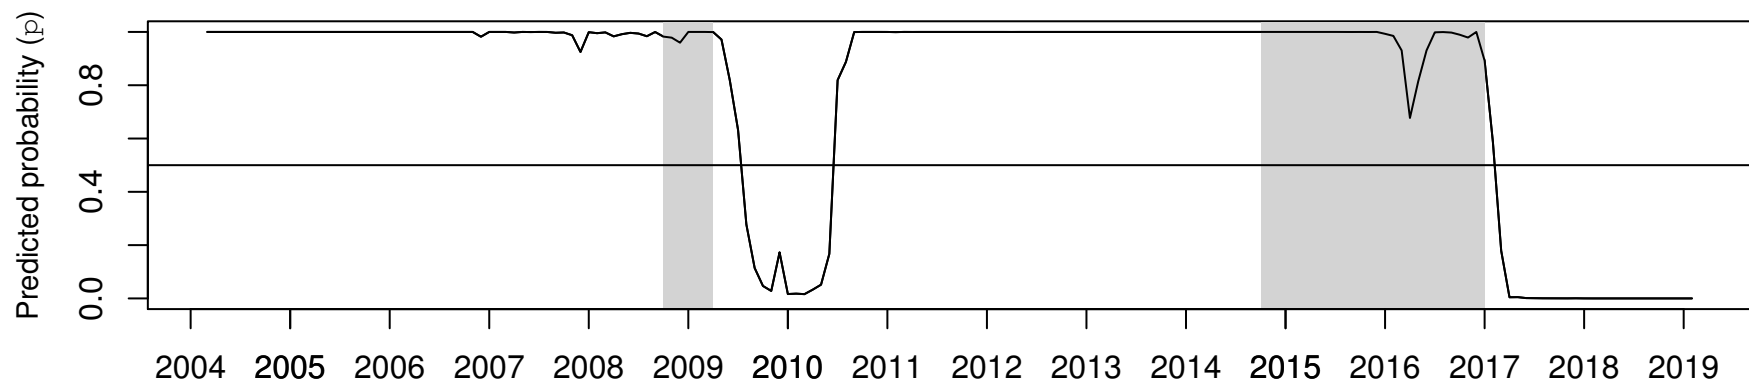

(b) DSSMS/E/NDR model

Supplement: Supplementary file 1 [file j_snde-2019-0122_suppl.zip]

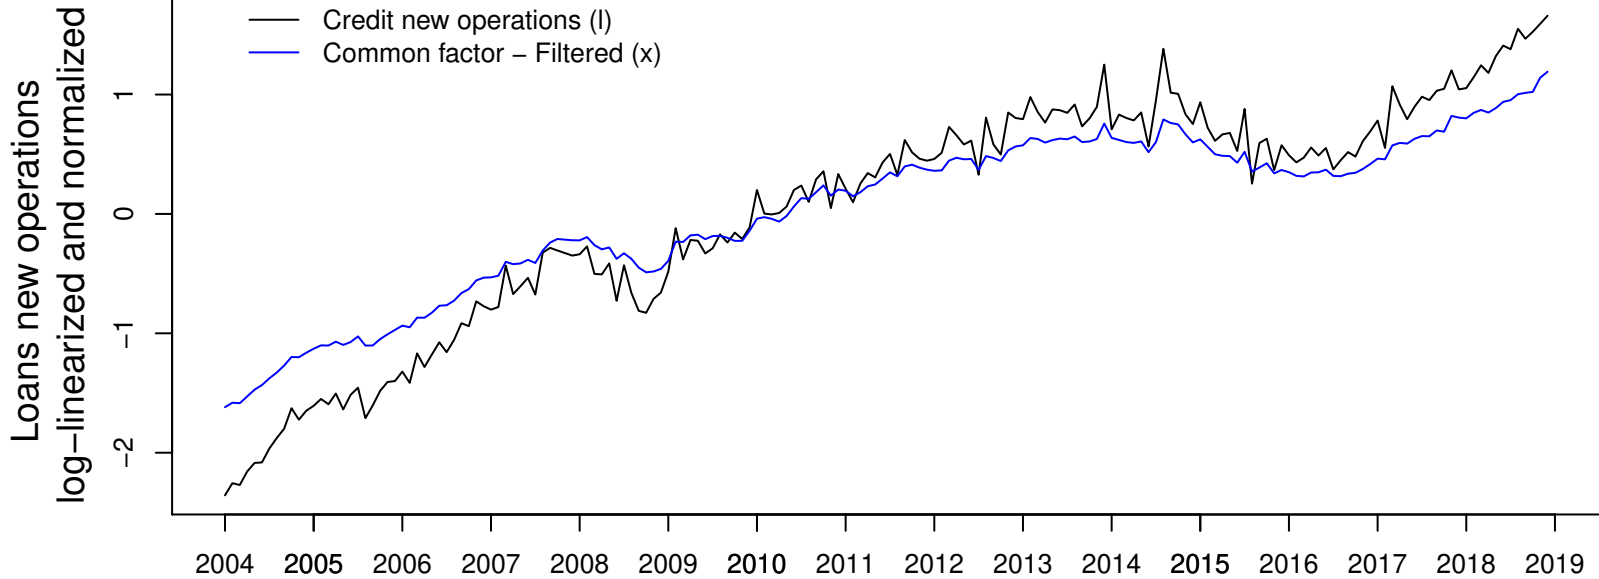

Supplement: Supplementary file 2 [file j_snde-2019-0122_suppl.zip]

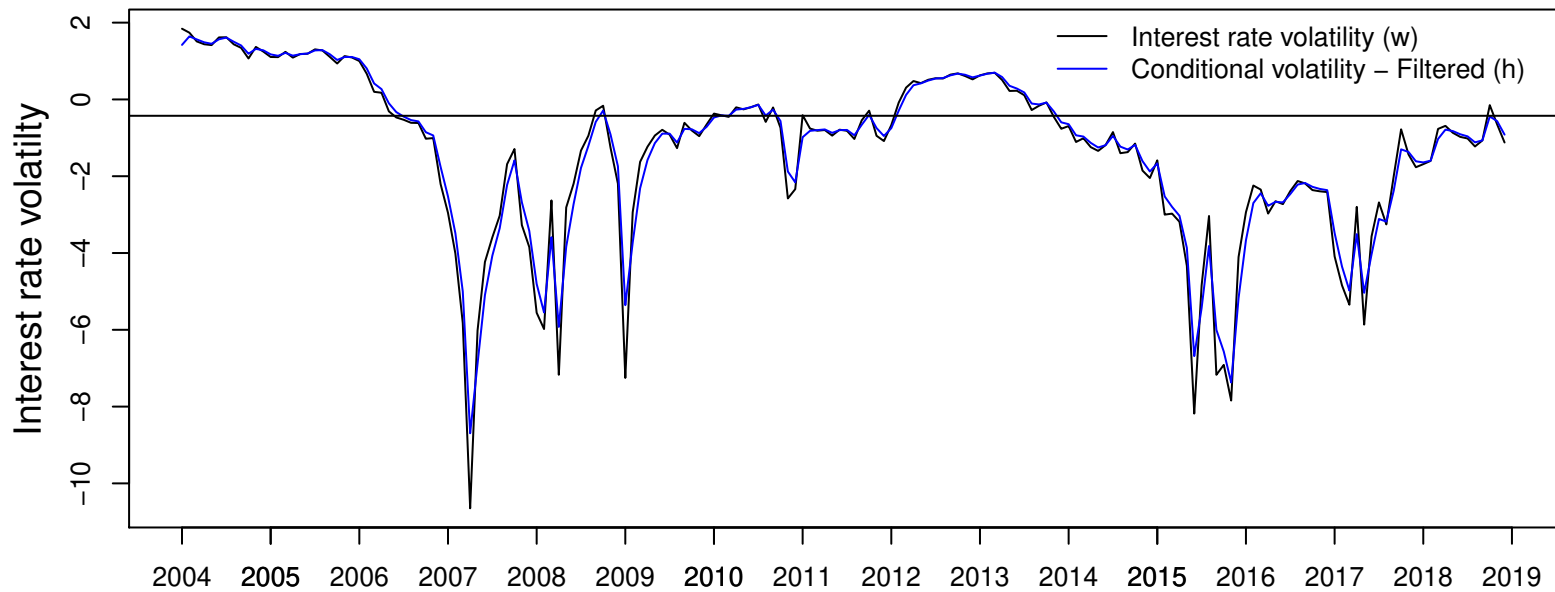

Supplement: Supplementary file 3 [file j_snde-2019-0122_suppl.zip]

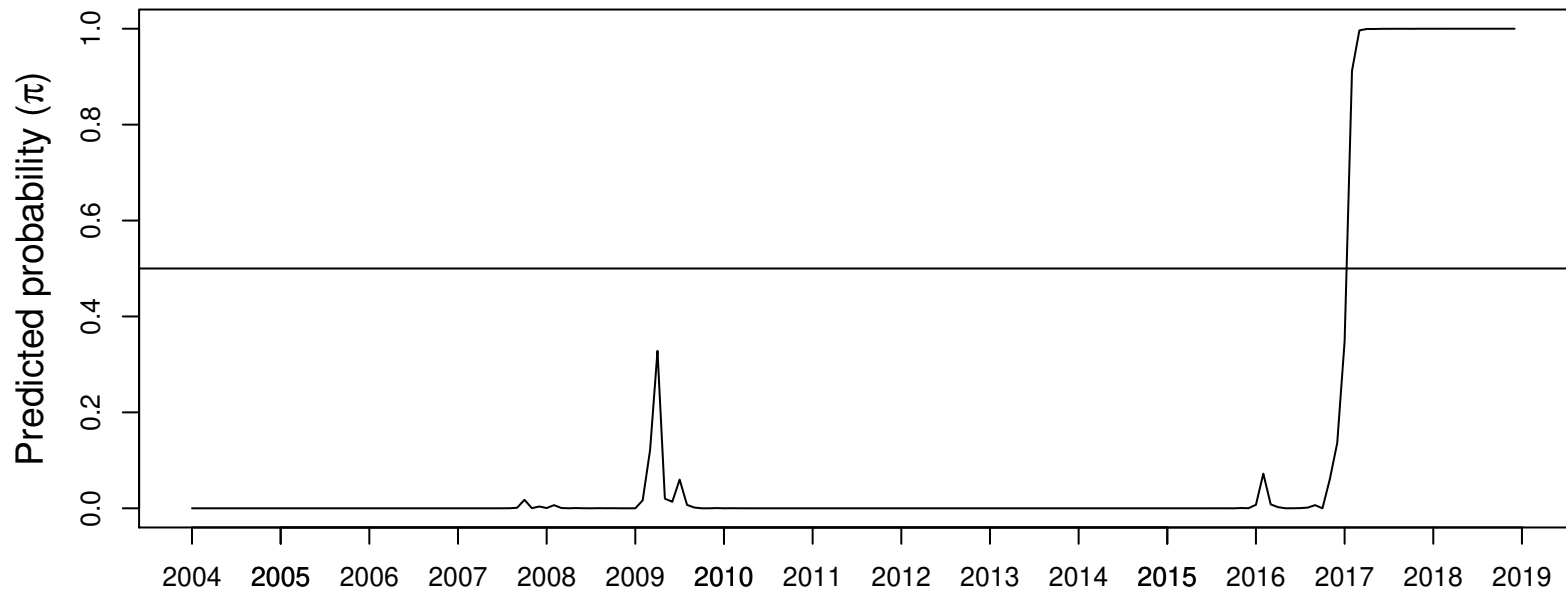

Supplement: Supplementary file 4 [file j_snde-2019-0122_suppl.zip]

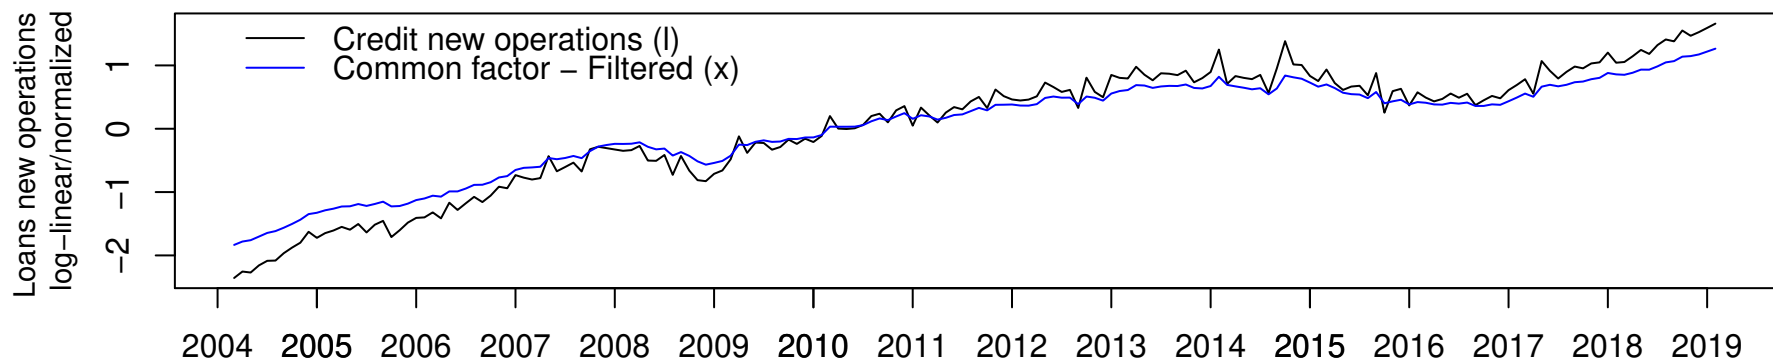

(a) DSST/E/DR

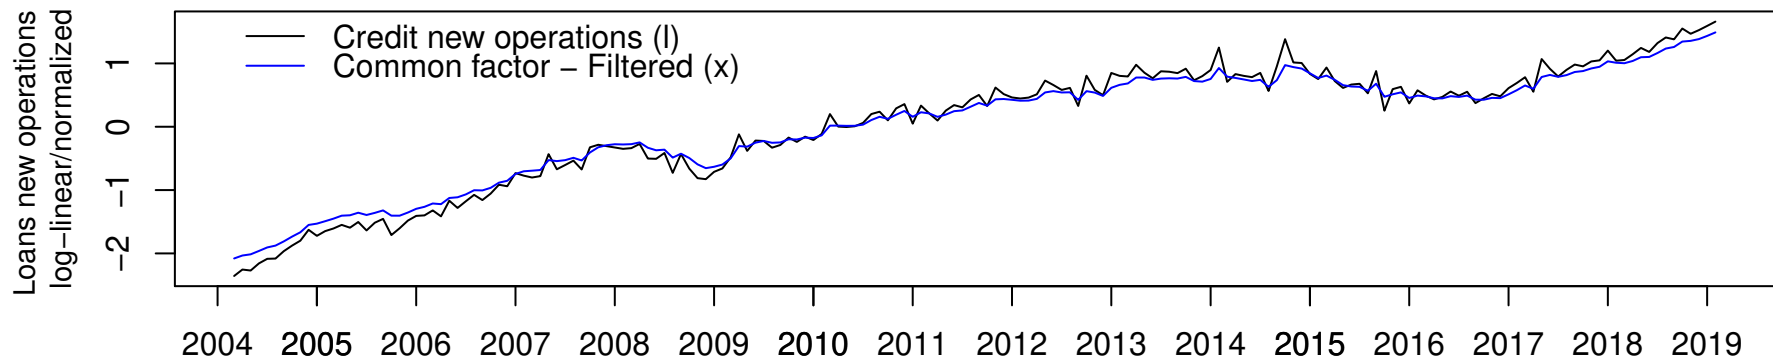

(b) DSST/E/NDR

Supplement: Supplementary file 5 [file j_snde-2019-0122_suppl.zip]

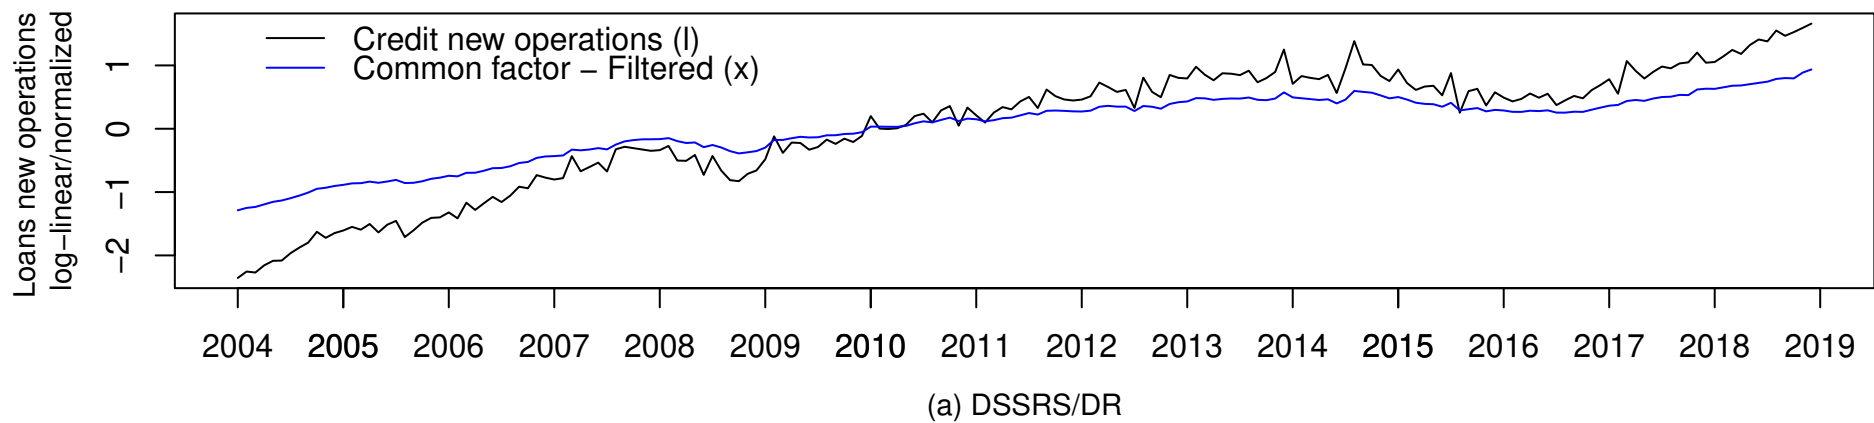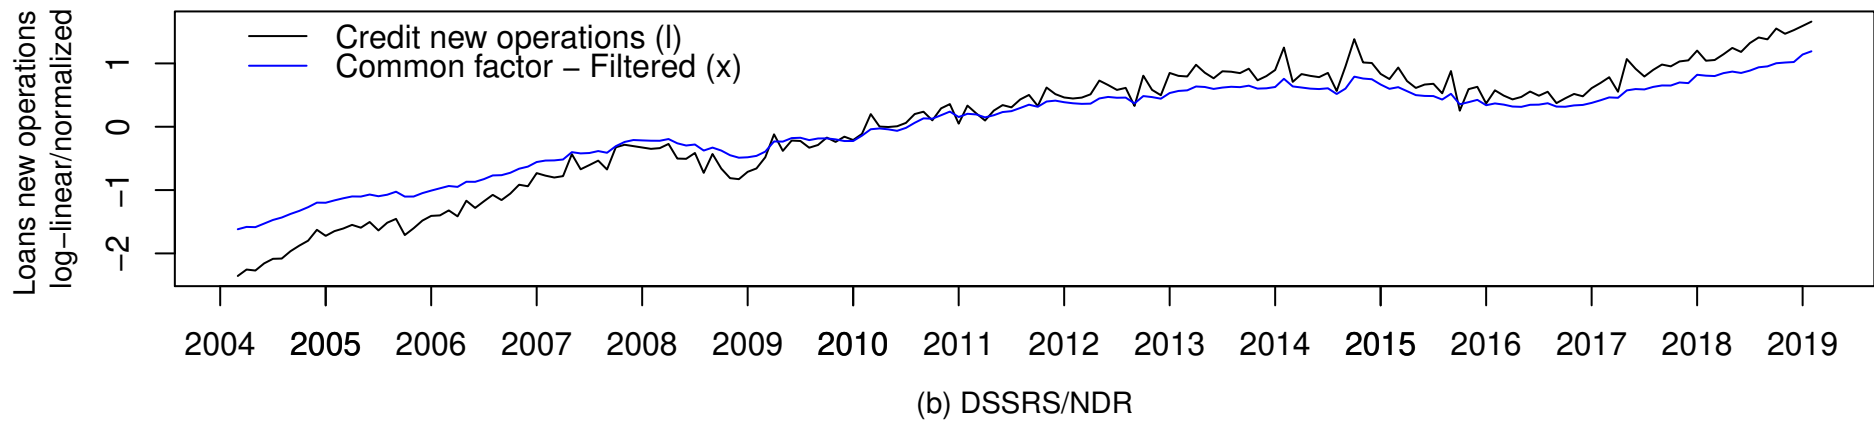

Supplement: Supplementary file 6 [file j_snde-2019-0122_suppl.zip]

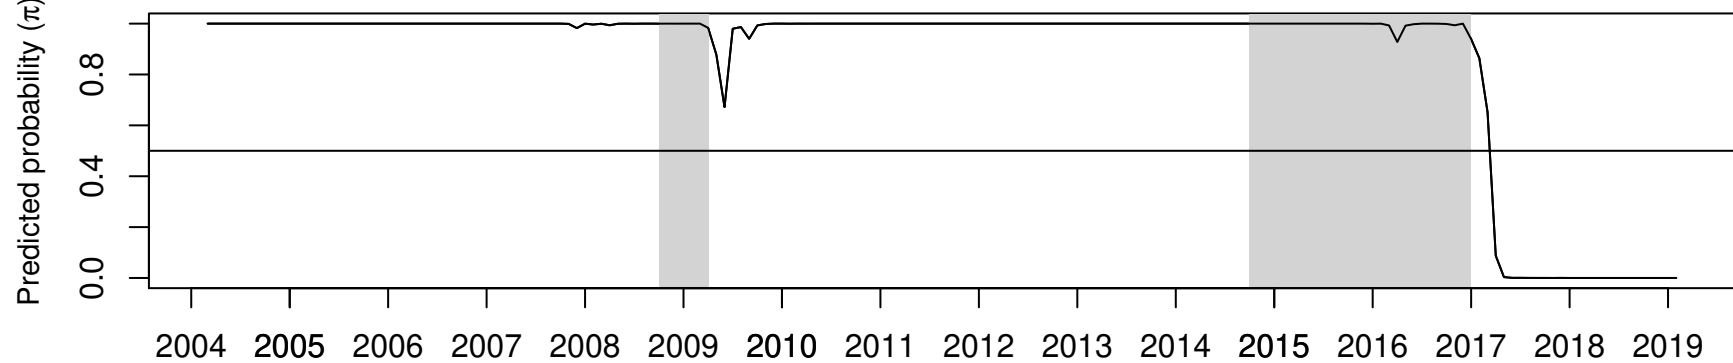

(a) DSSRS/DR model

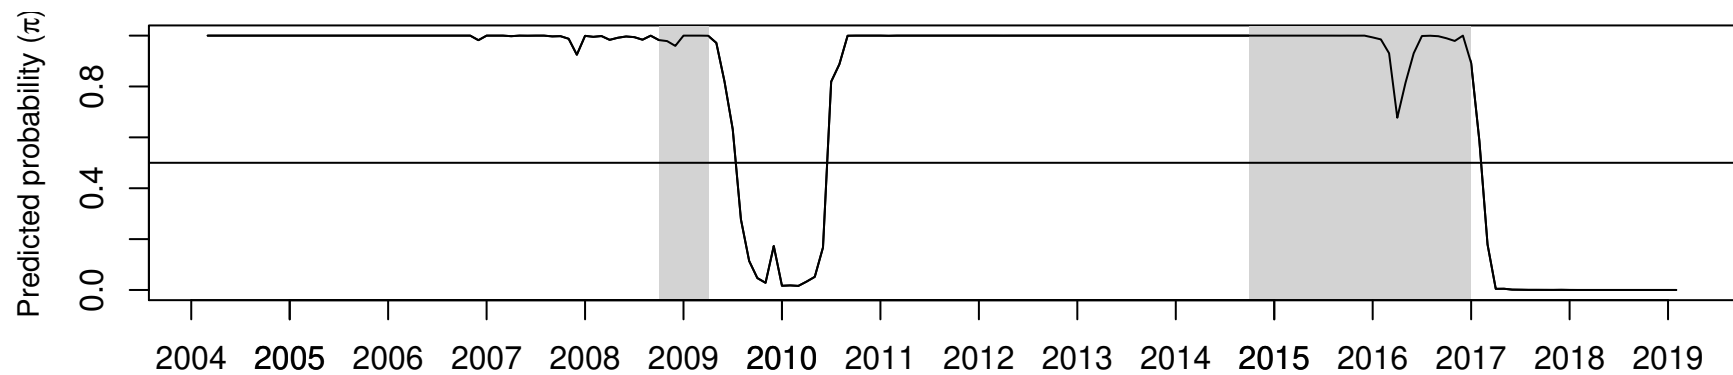

(b) DSSRS/NDR model

Supplement: Supplementary file 7 [file j_snde-2019-0122_suppl.zip]

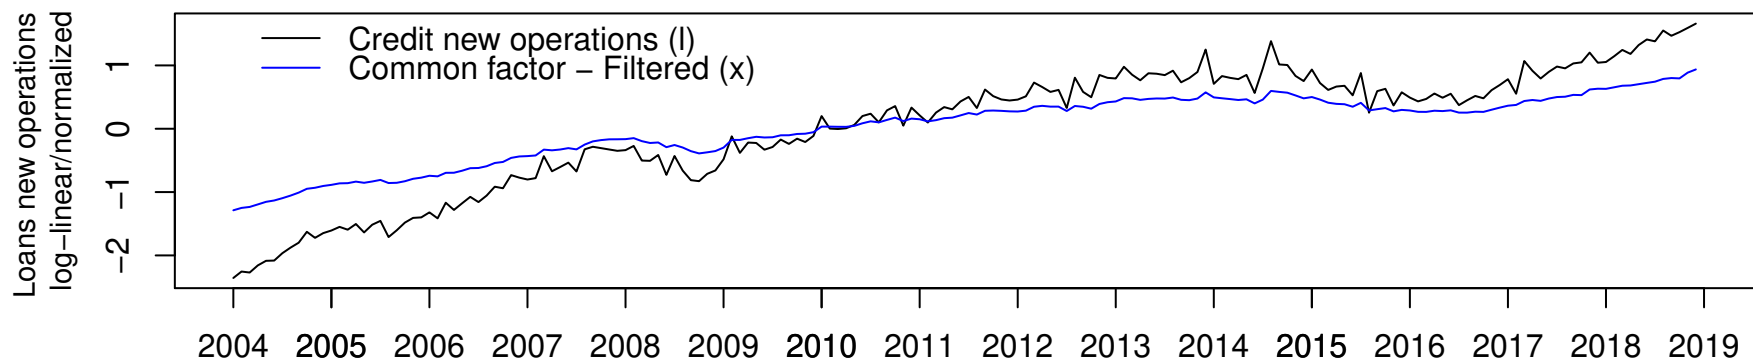

(a) DSSRS/E/DR

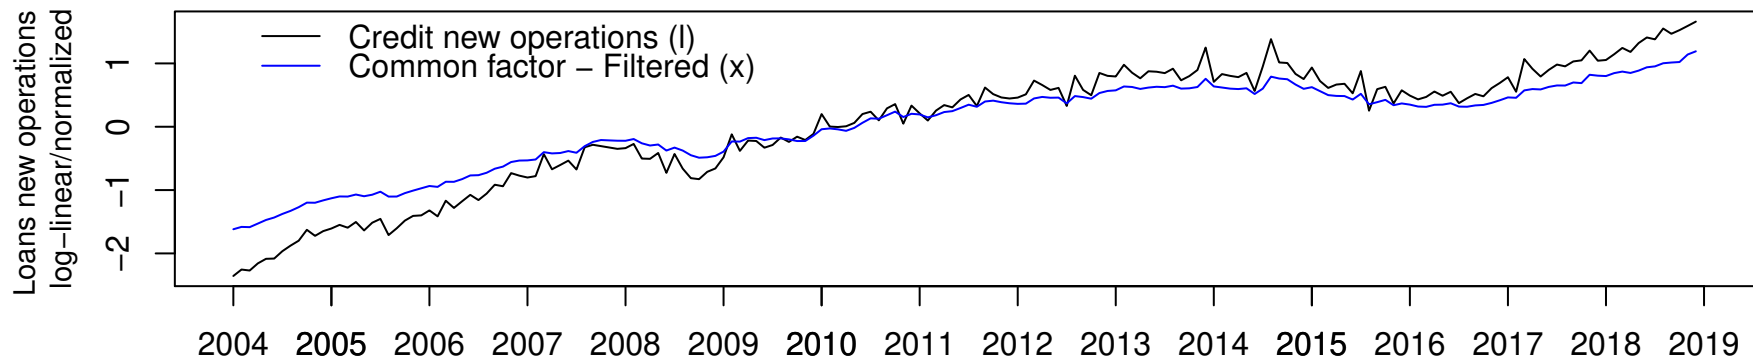

(b) DSSRS/E/NDR

Supplement: Supplementary file 8 [file j_snde-2019-0122_suppl.zip]

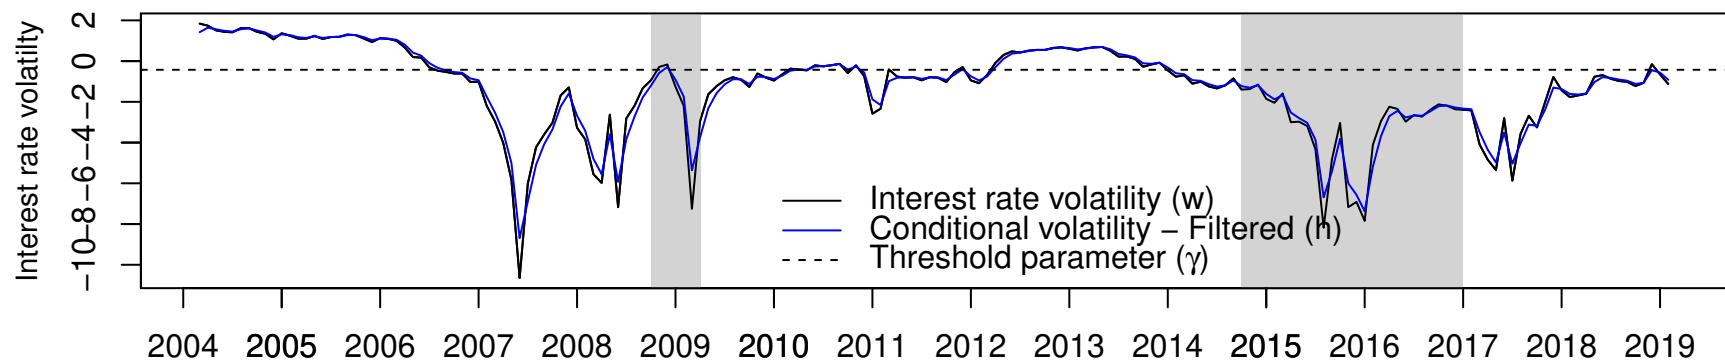

(a) DSST/DR

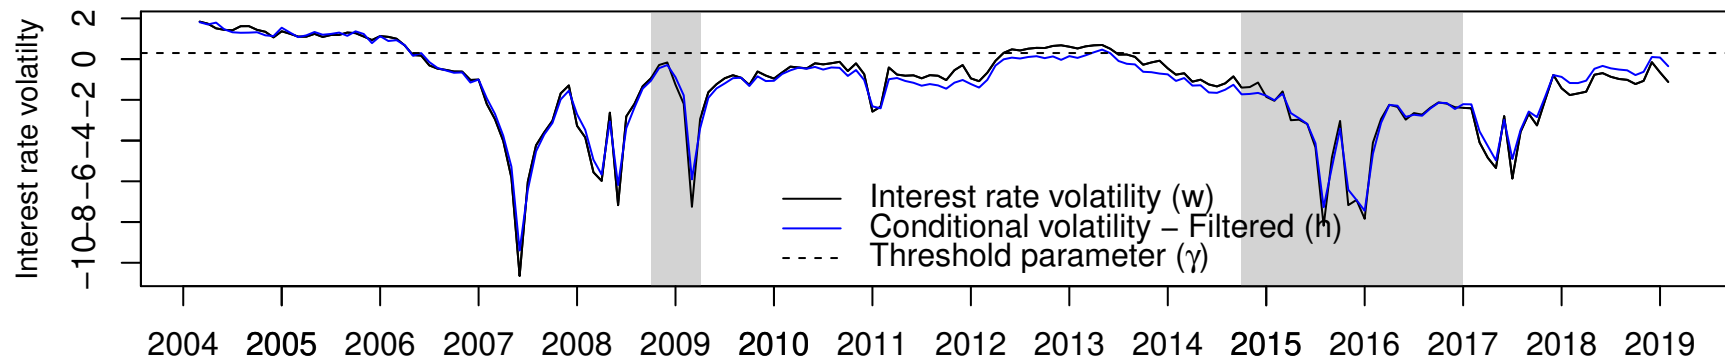

(b) DSST/NDR

Supplement: Supplementary file 9 [file j_snde-2019-0122_suppl.zip]

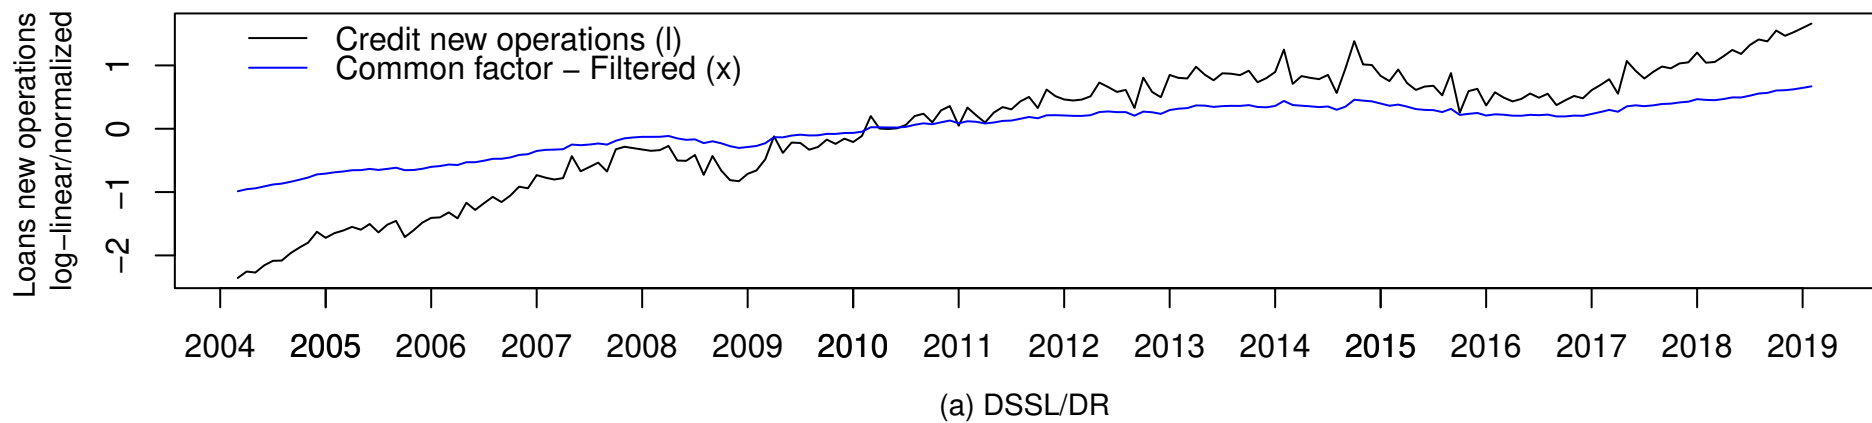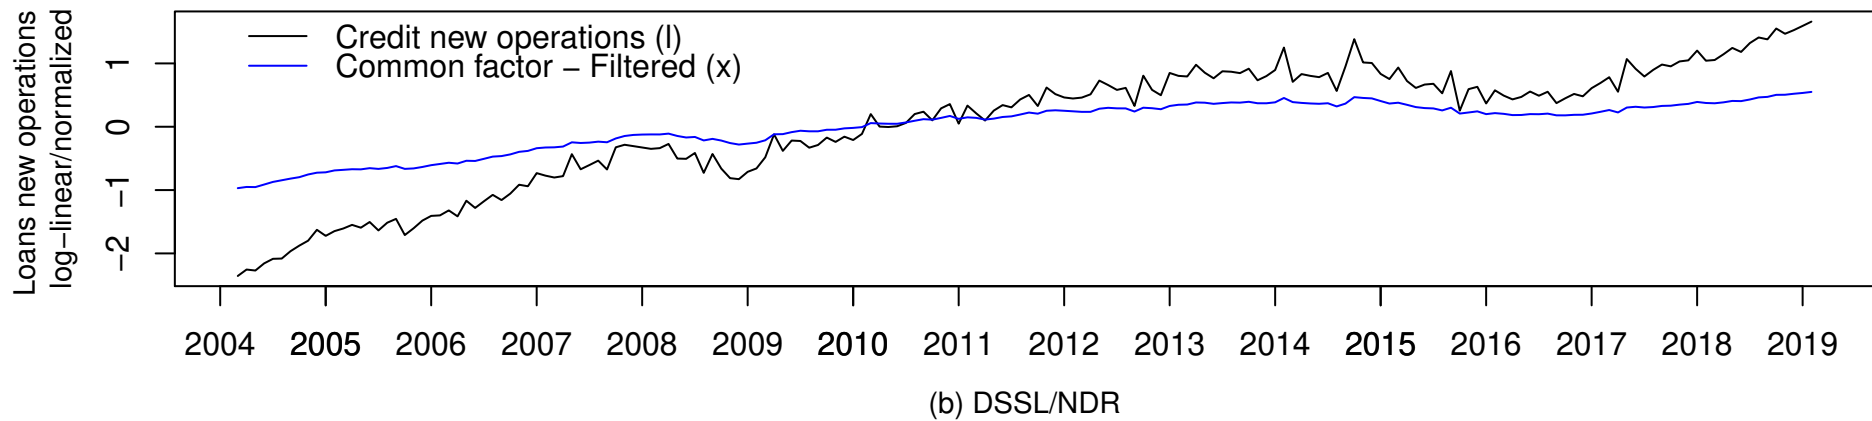

Supplement: Supplementary file 10 [file j_snde-2019-0122_suppl.zip]

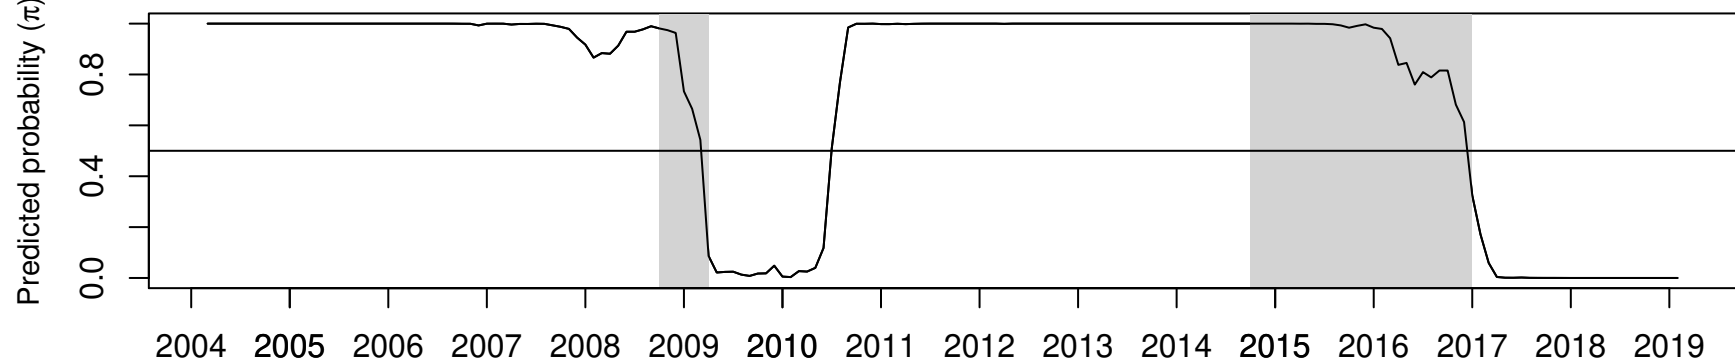

(a) DSSRS/E&F/DR model

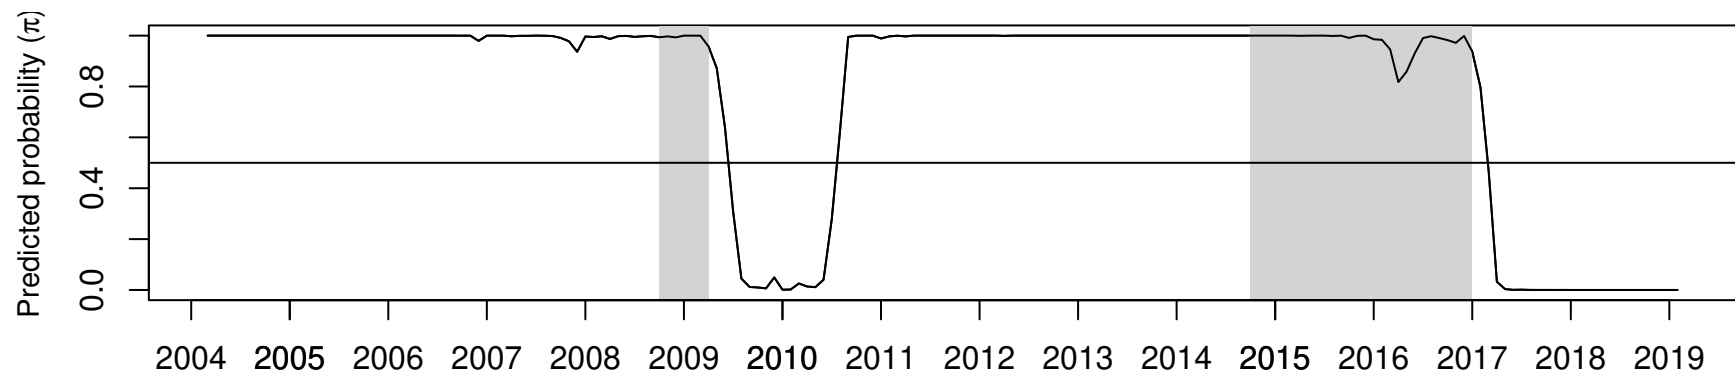

(b) DSSRS/E&F/NDR model

Supplement: Supplementary file 11 [file j_snde-2019-0122_suppl.zip]

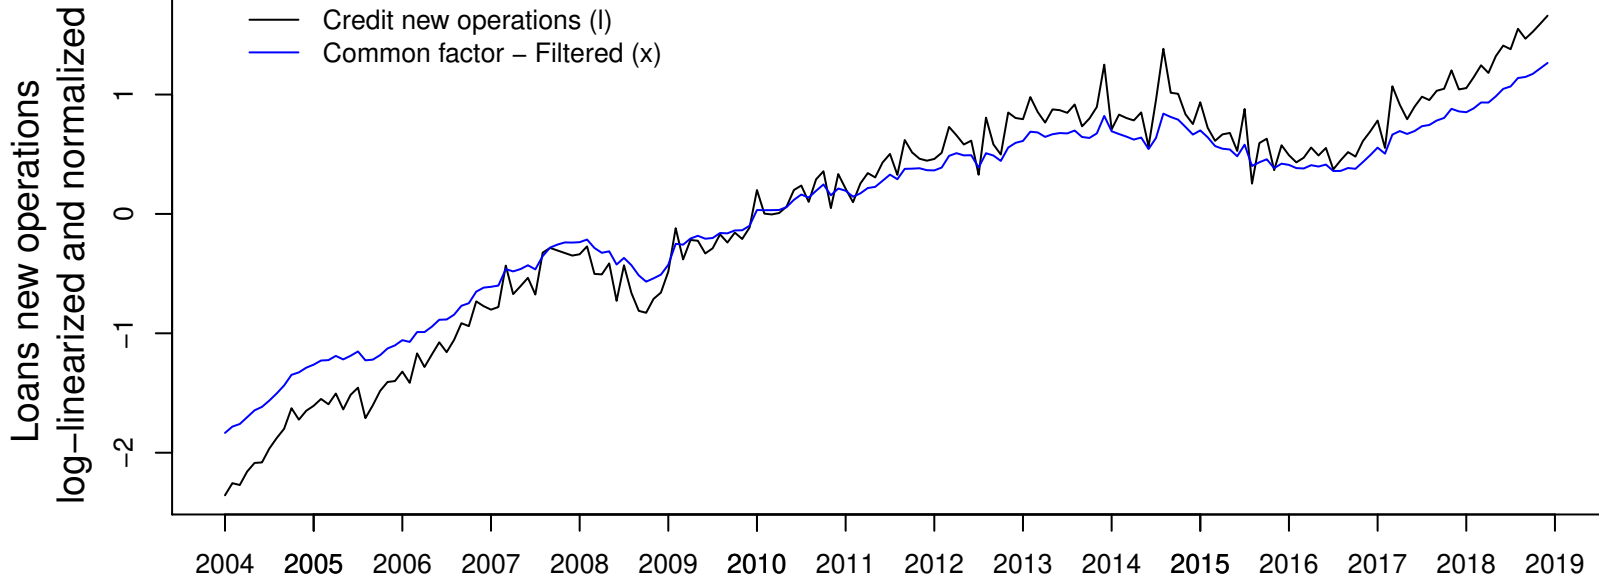

Supplement: Supplementary file 13 [file j_snde-2019-0122_suppl.zip]

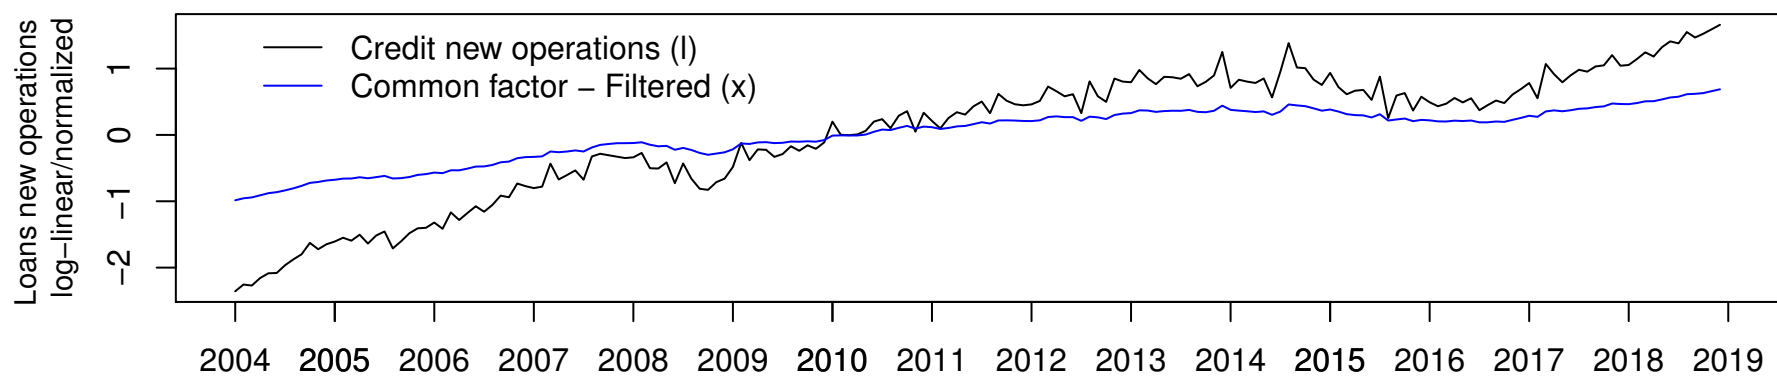

(a) DSSMS/E&F/DR

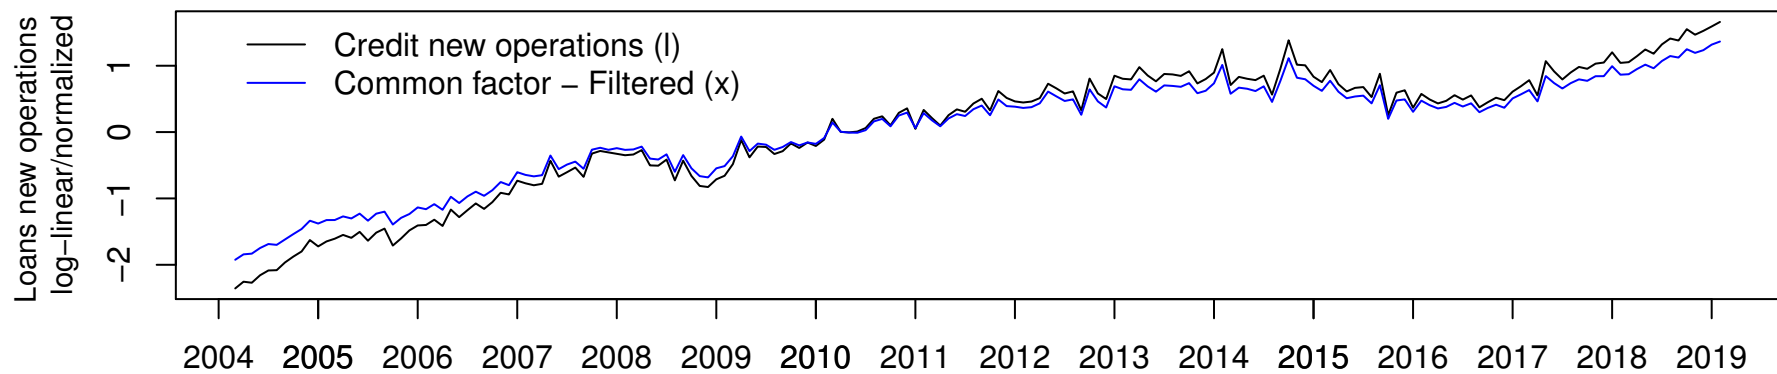

(b) DSSMS/E&F/NDR

Supplement: Supplementary file 14 [file j_snde-2019-0122_suppl.zip]

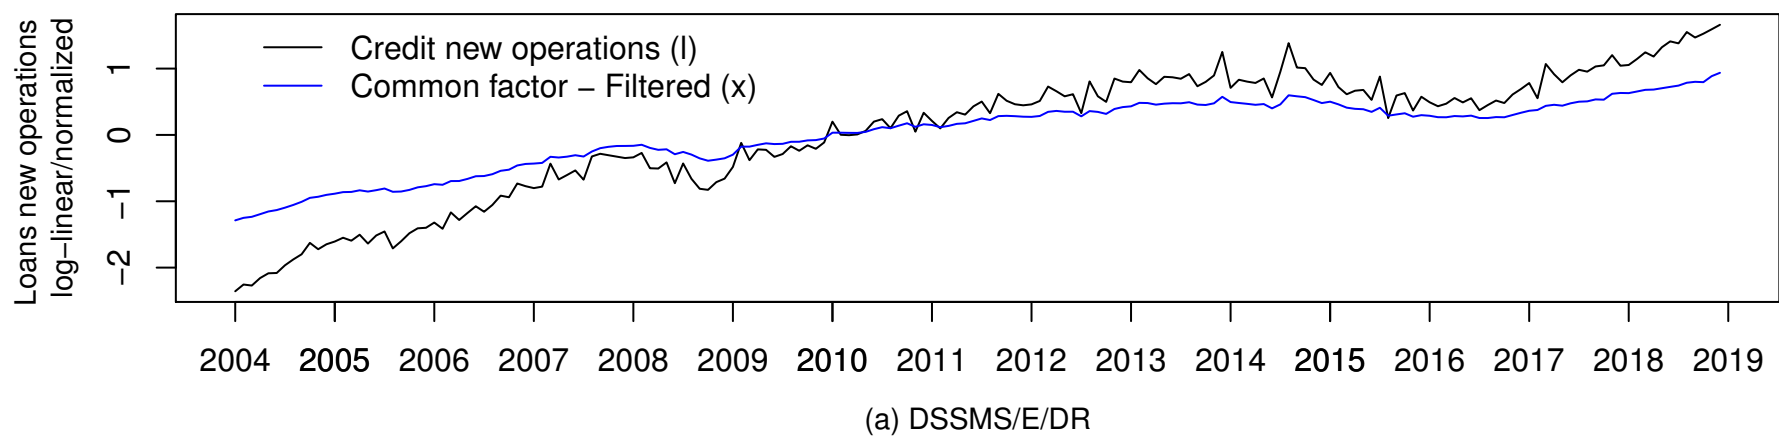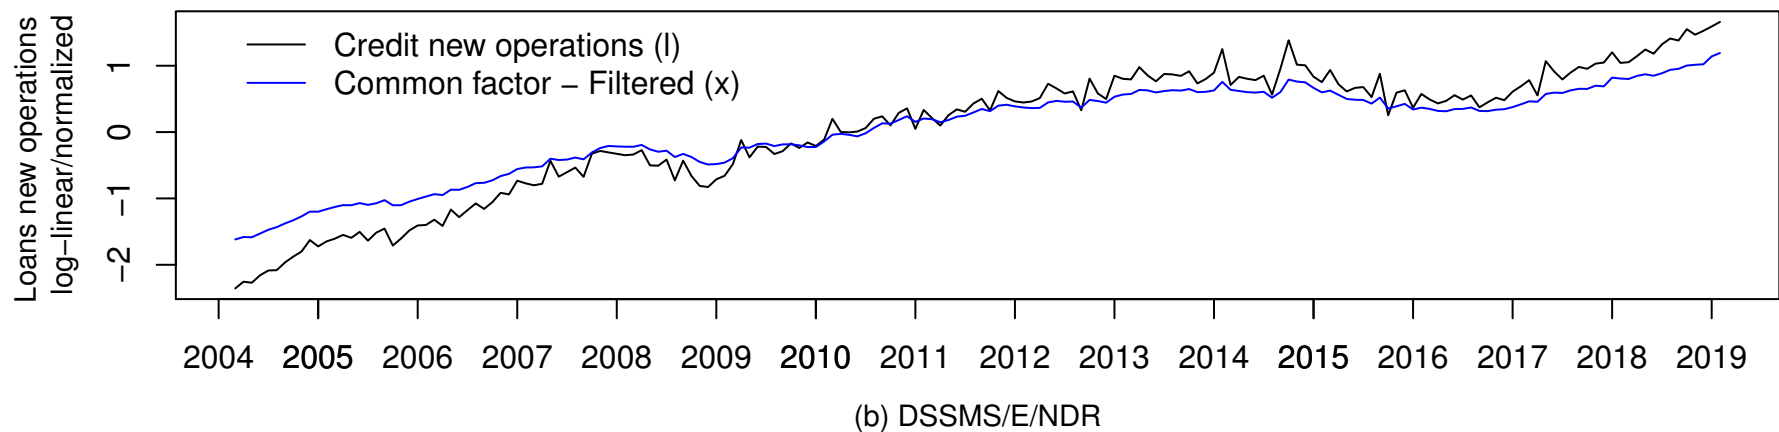

Supplement: Supplementary file 15 [file j_snde-2019-0122_suppl.zip]

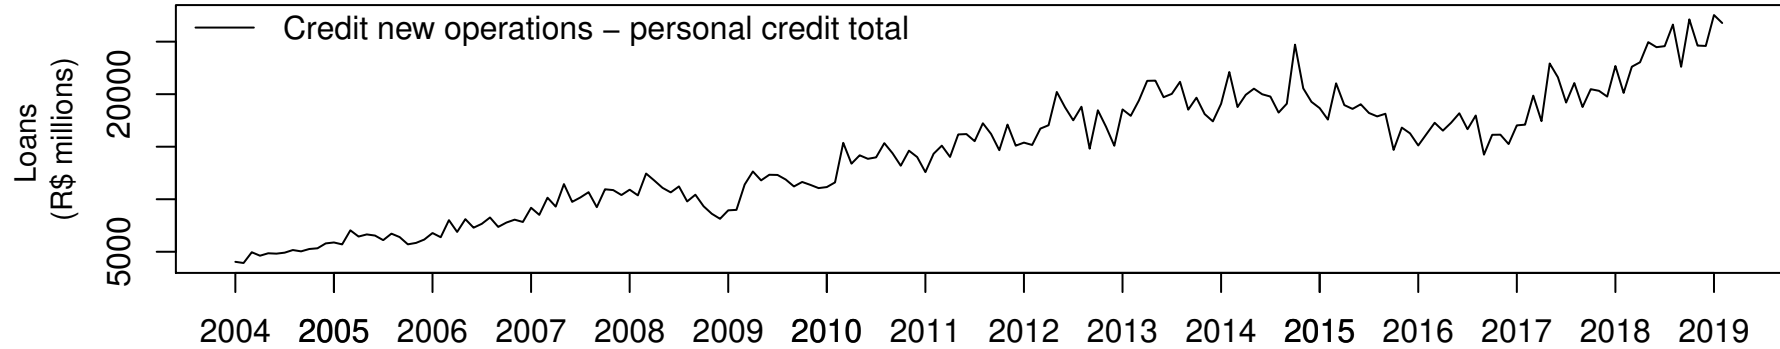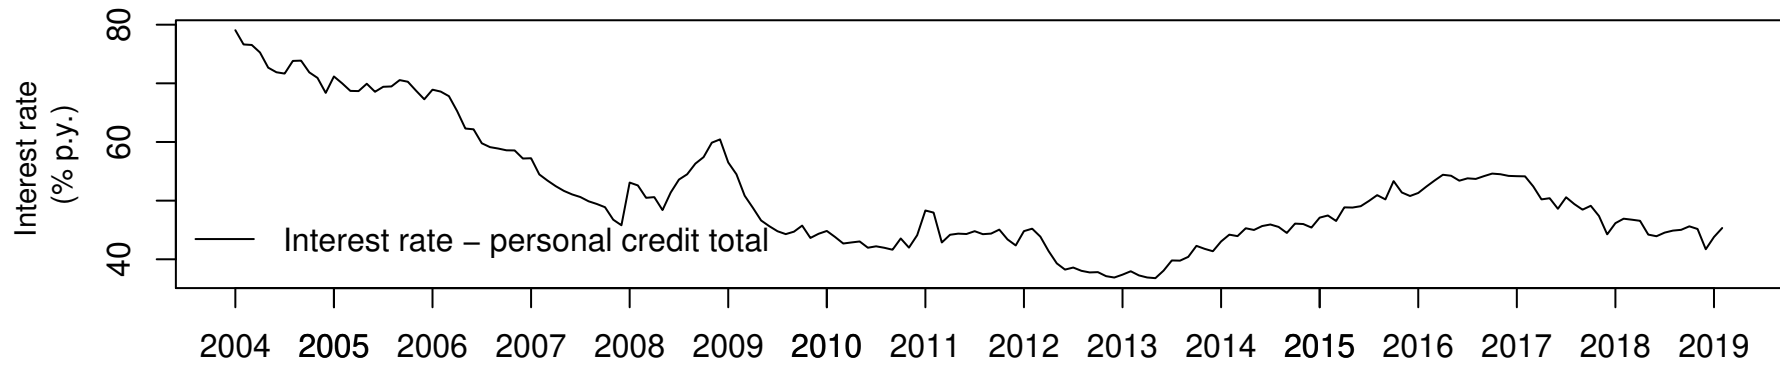

Supplement: Supplementary file 16 [file j_snde-2019-0122_suppl.zip]

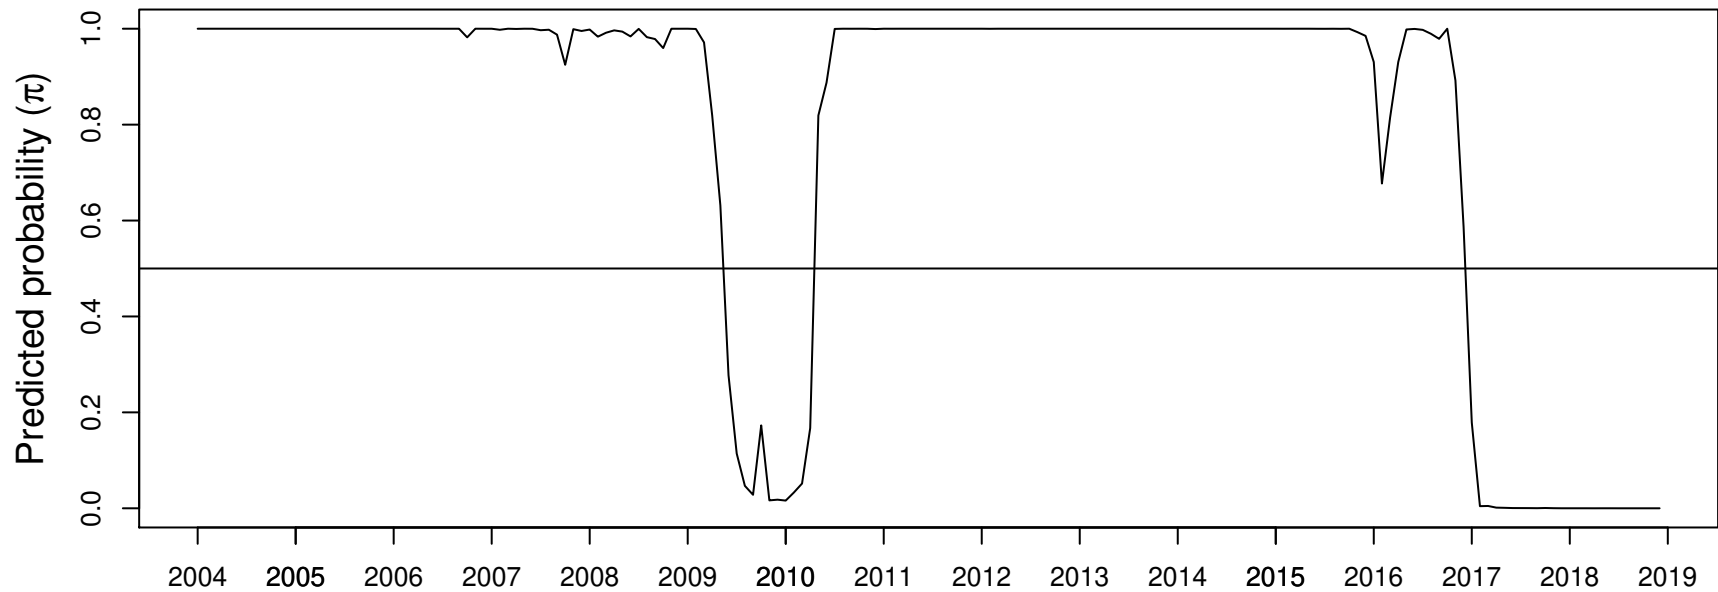

Supplement: Supplementary file 17 [file j_snde-2019-0122_suppl.zip]

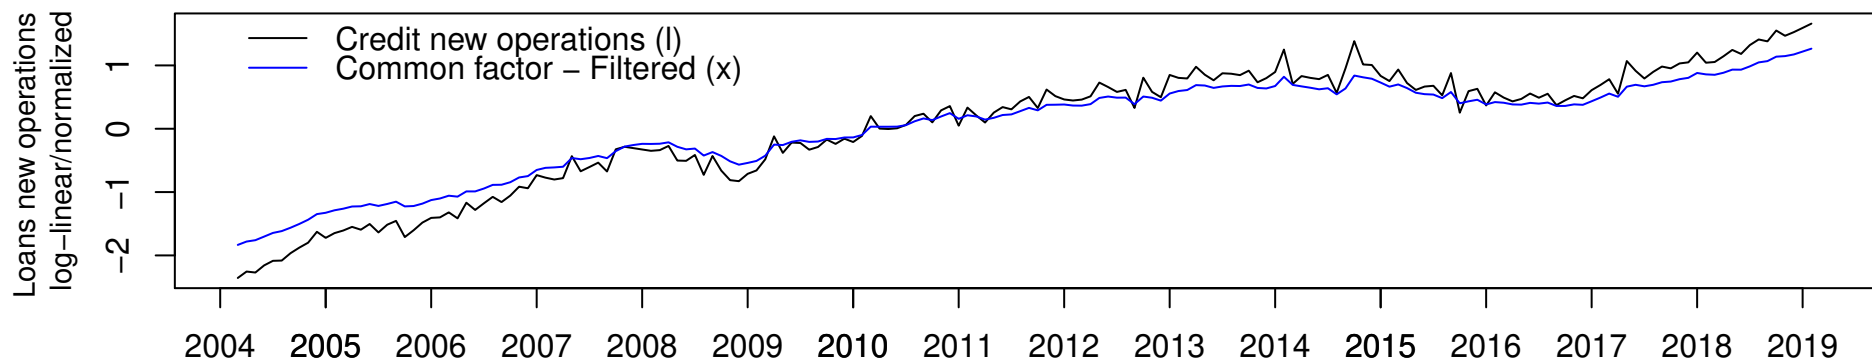

(a) DSST/DR

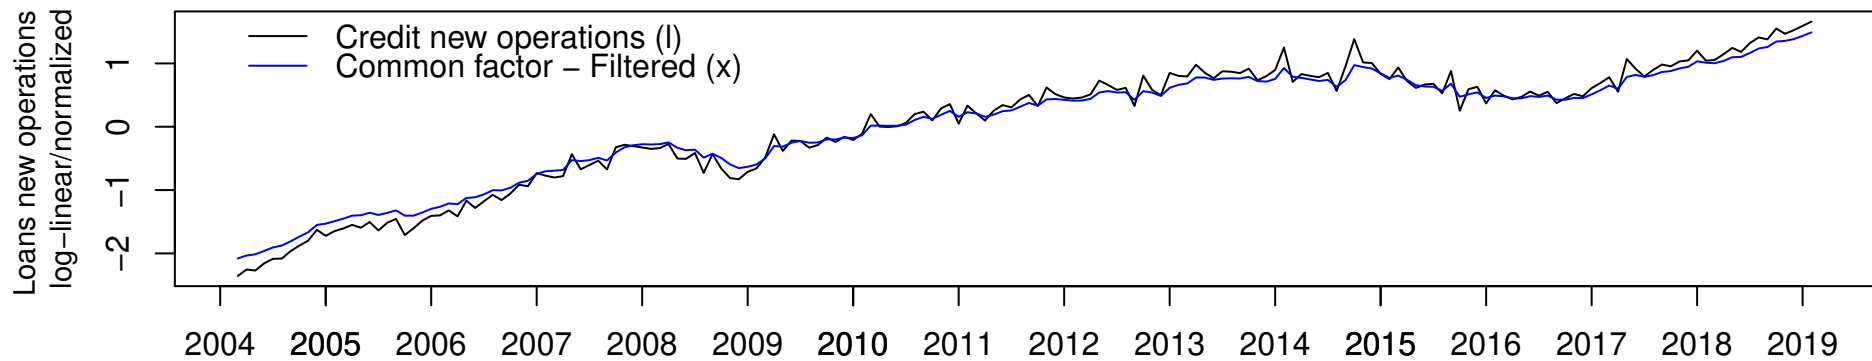

(b) DSST/NDR

Supplement: Supplementary file 18 [file j_snde-2019-0122_suppl.zip]

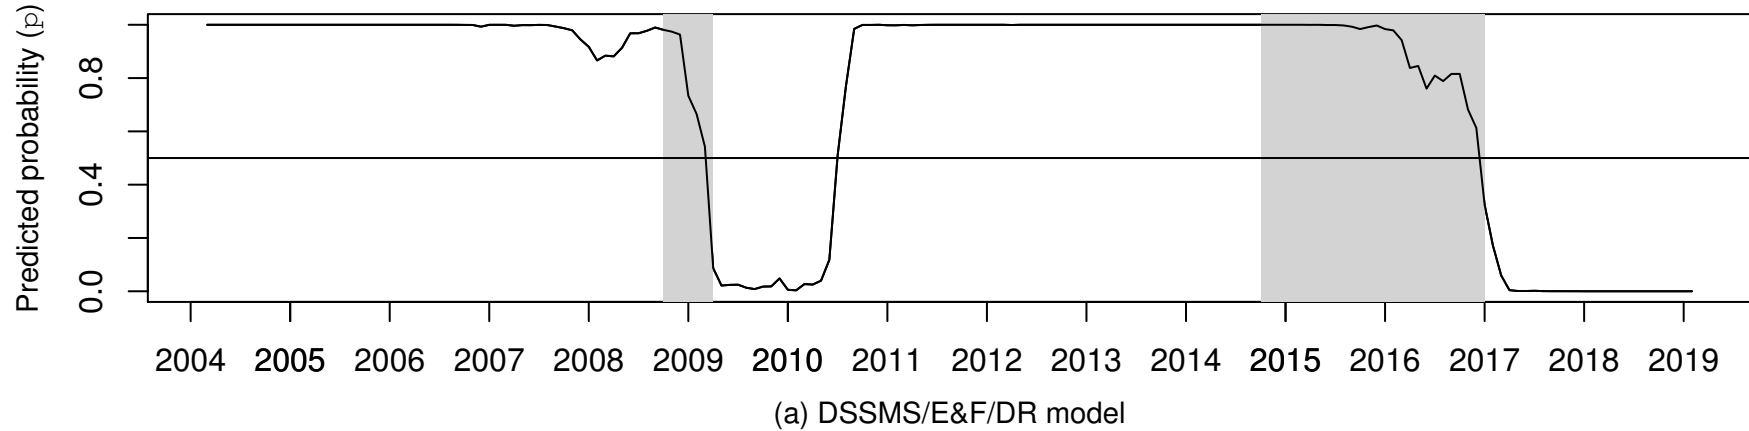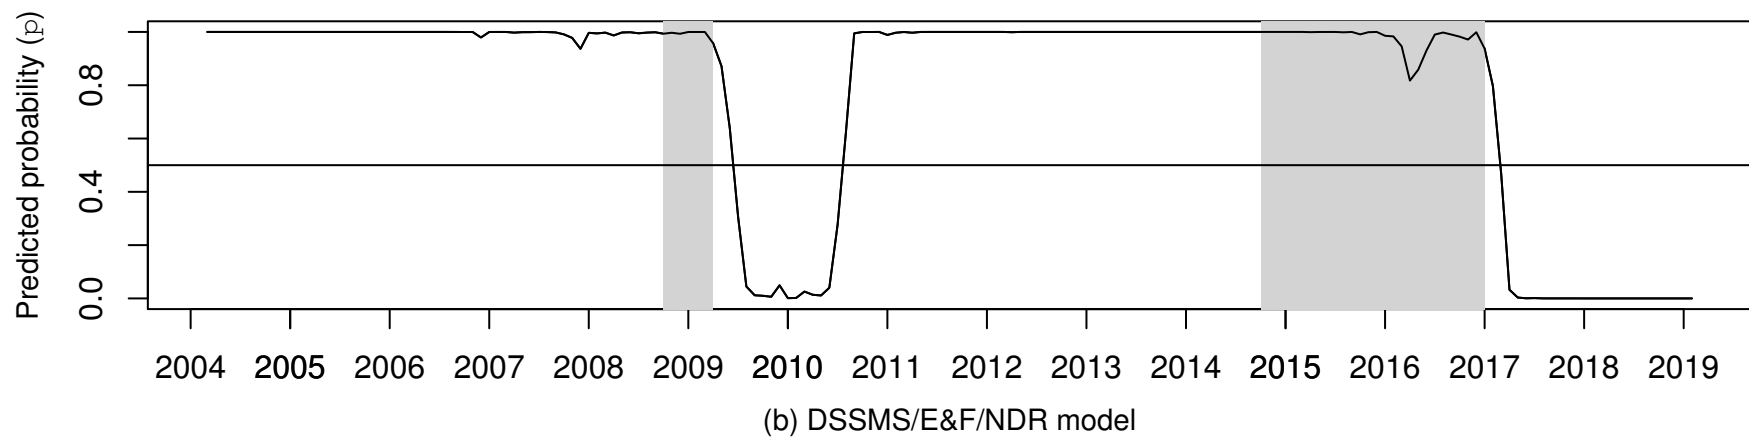

Supplement: Supplementary file 19 [file j_snde-2019-0122_suppl.zip]

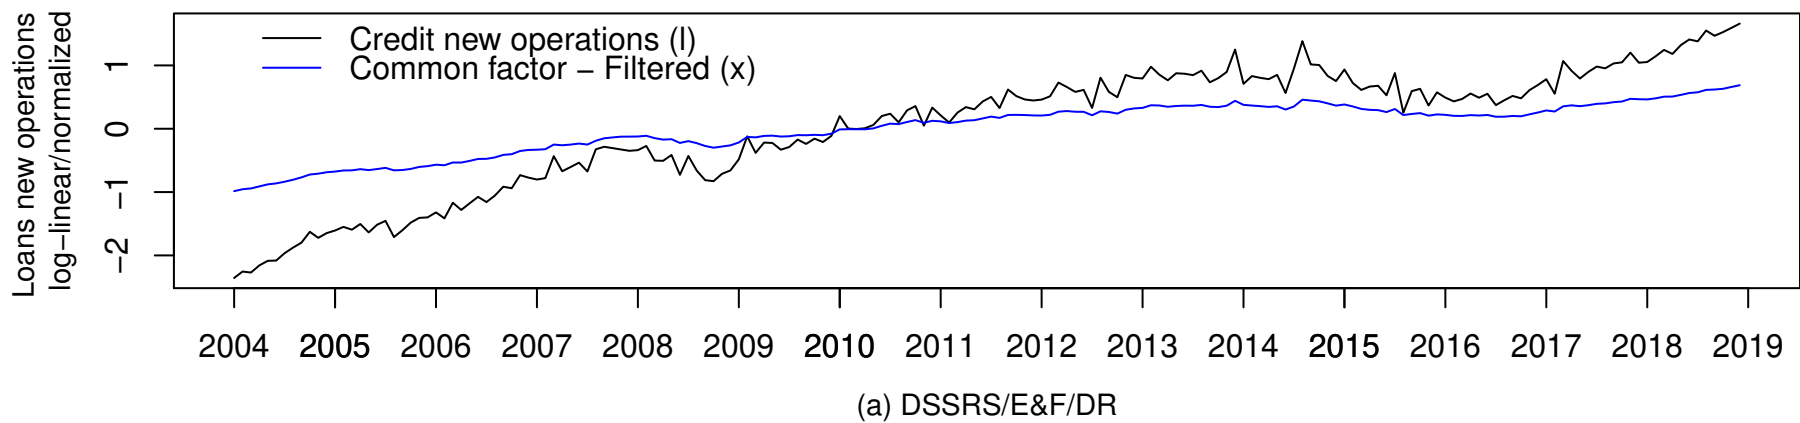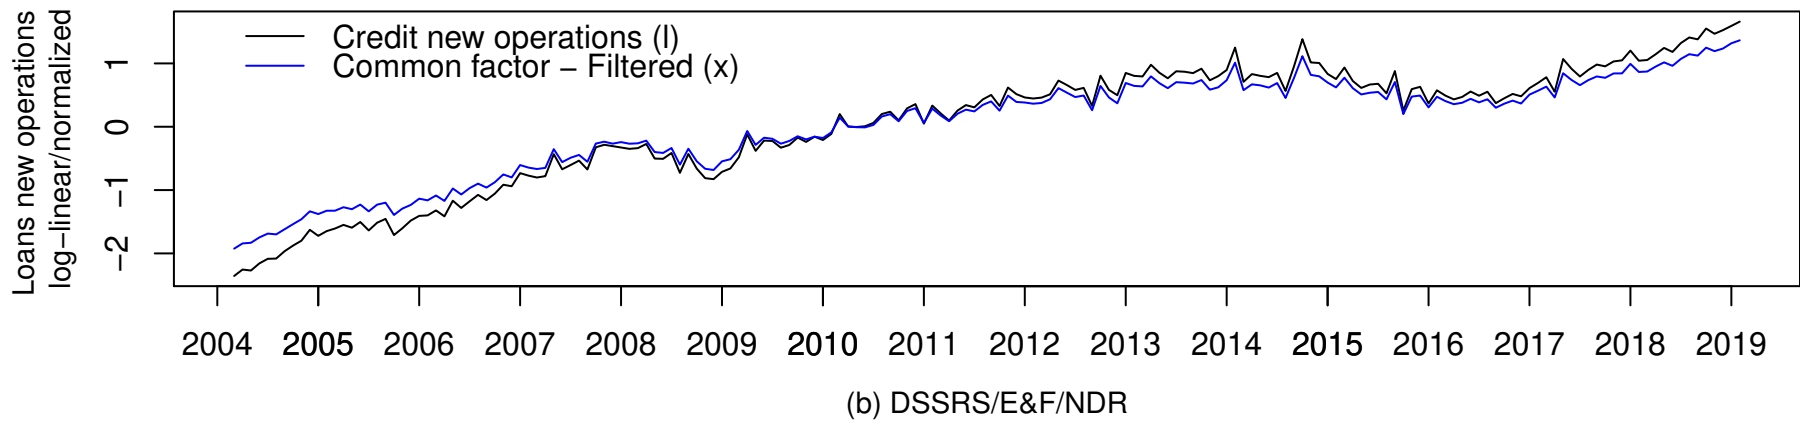

Supplement: Supplementary file 20 [file j_snde-2019-0122_suppl.zip]

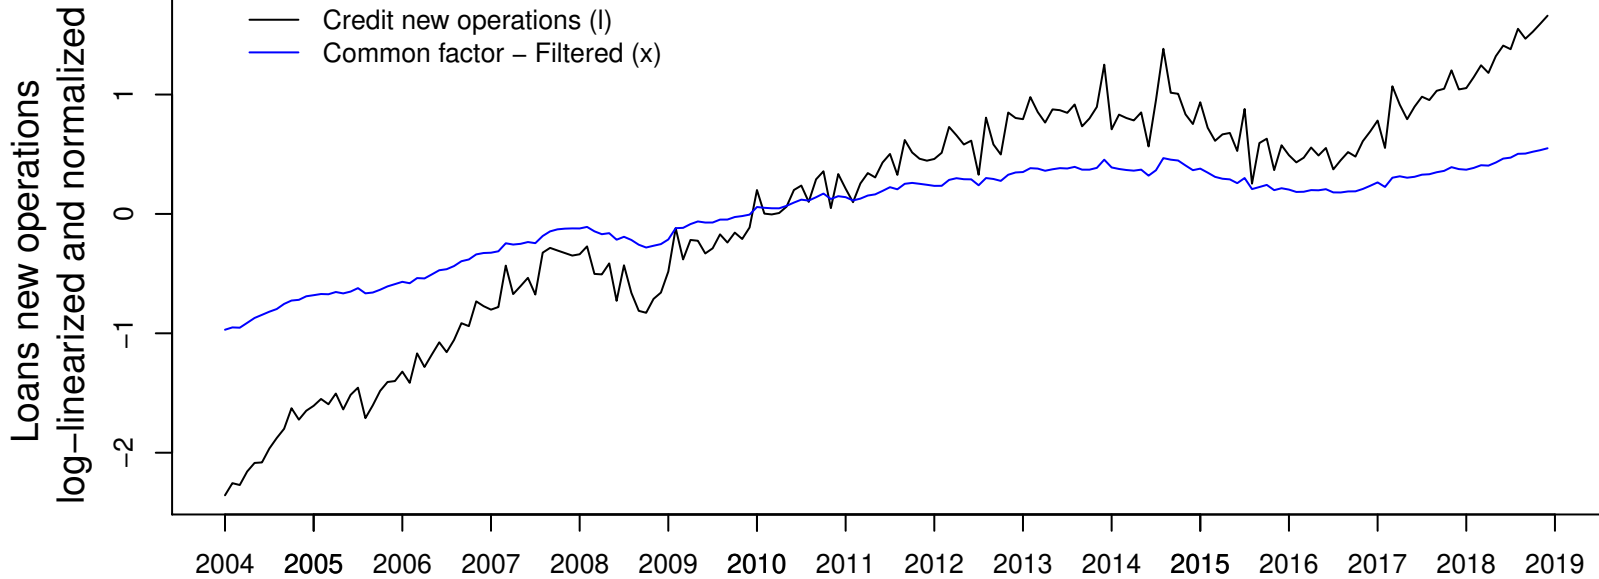

Supplement: Supplementary file 21 [file j_snde-2019-0122_suppl.zip]

Predicted probability ( $\pi$ )

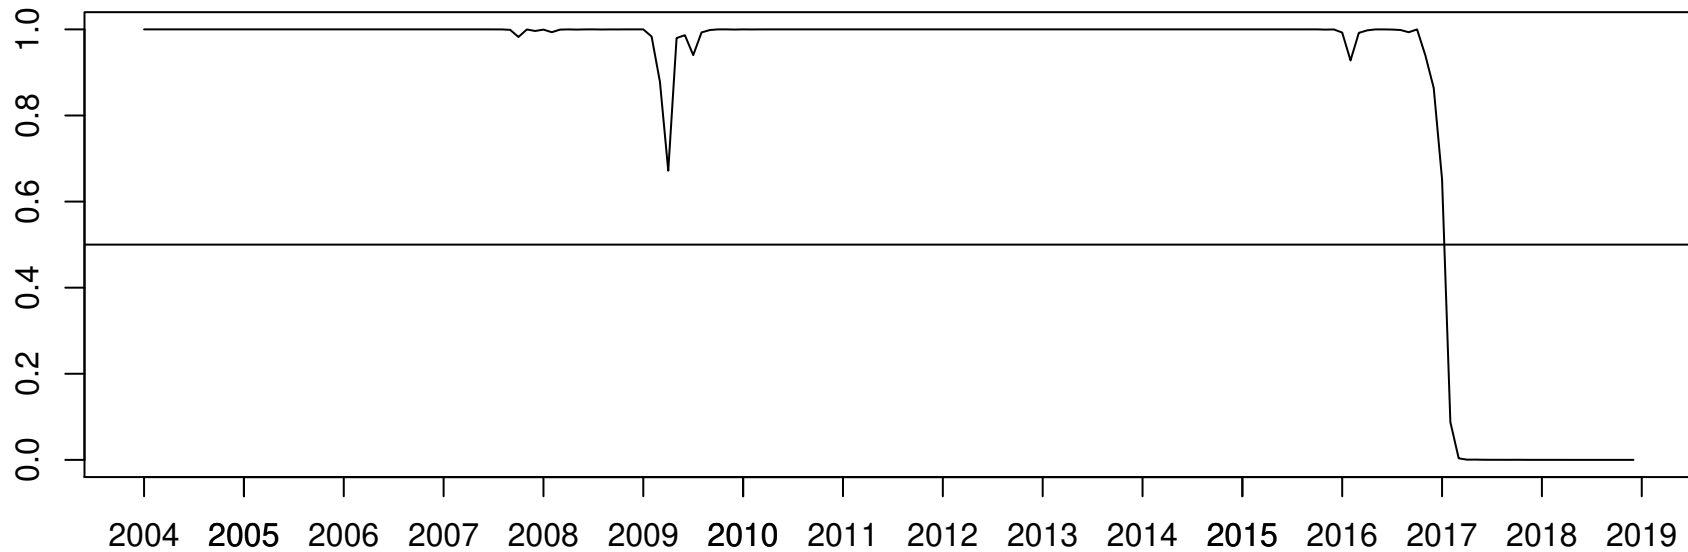

Supplement: Supplementary file 22 [file j_snde-2019-0122_suppl.zip]

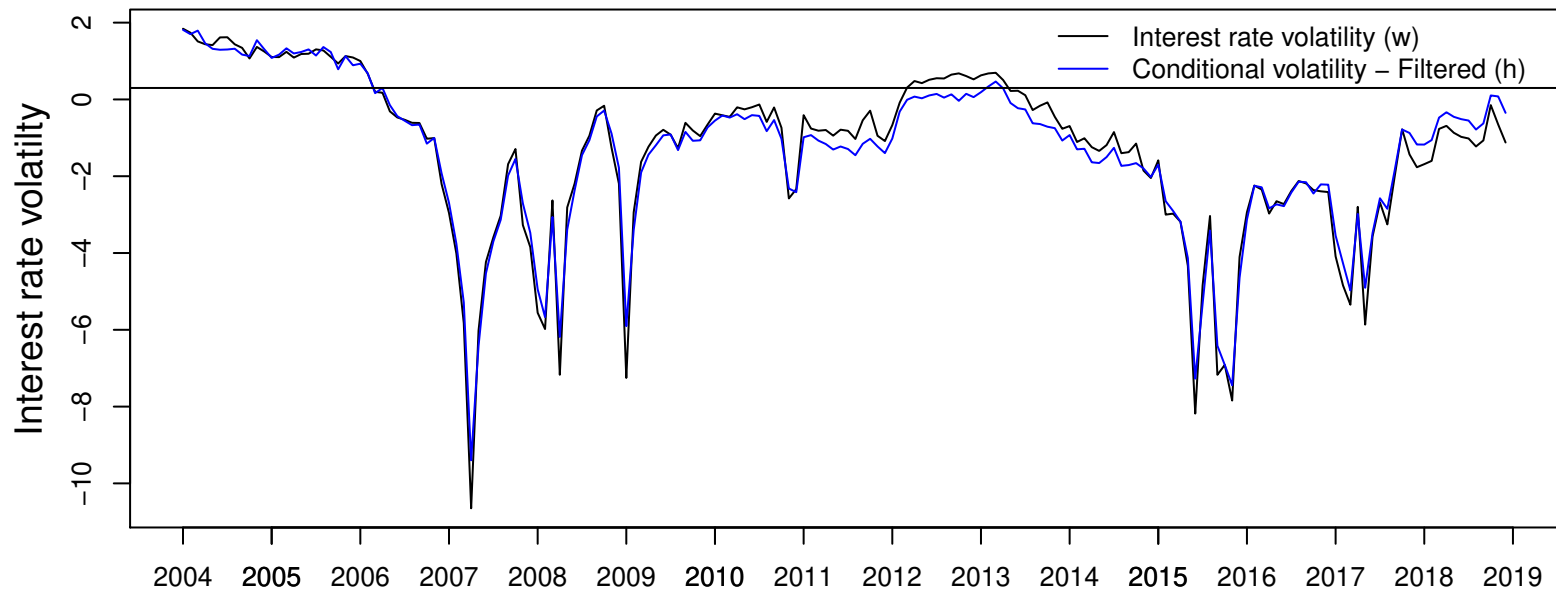

Supplement: Supplementary file 23 [file j_snde-2019-0122_suppl.zip]

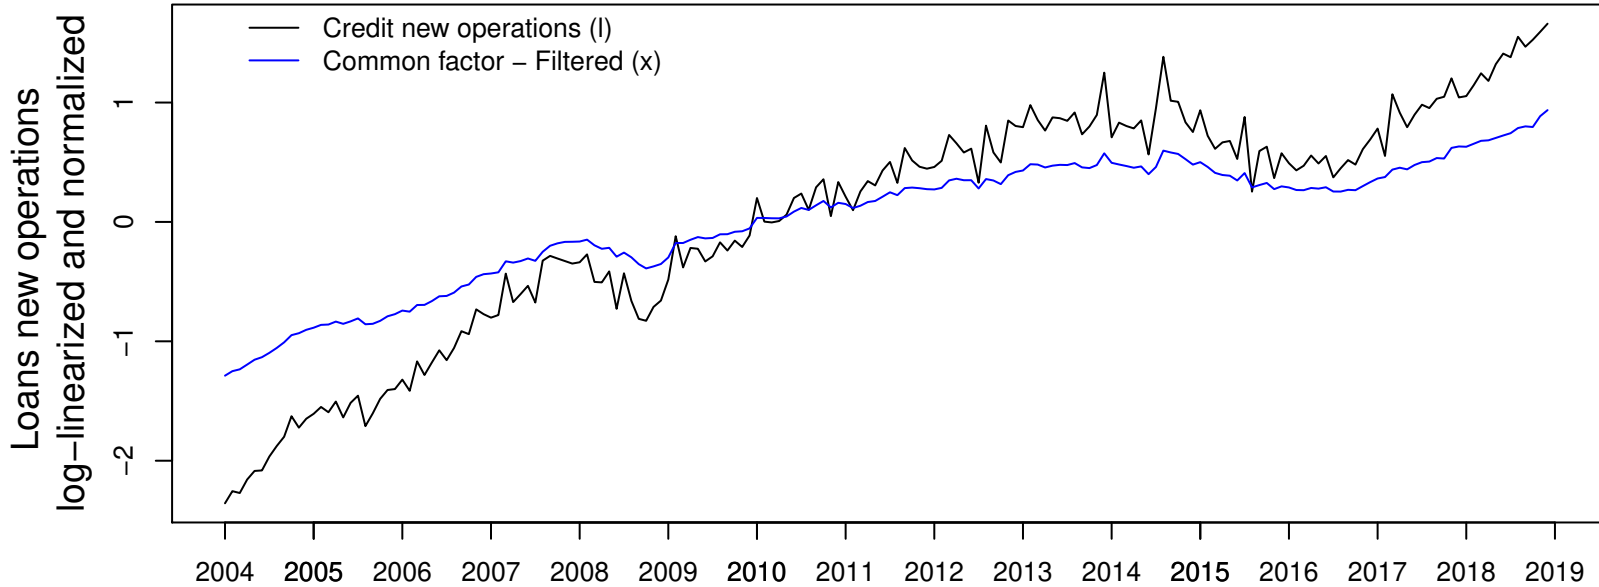

Supplement: Supplementary file 26 [file j_snde-2019-0122_suppl.zip]

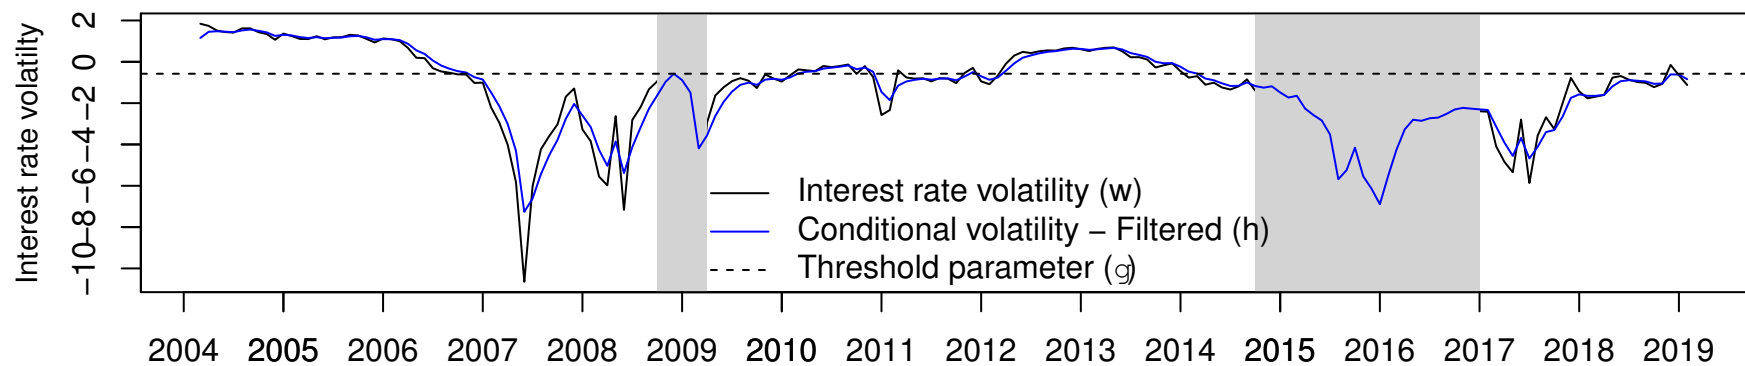

(a) DSST/E&F/DR

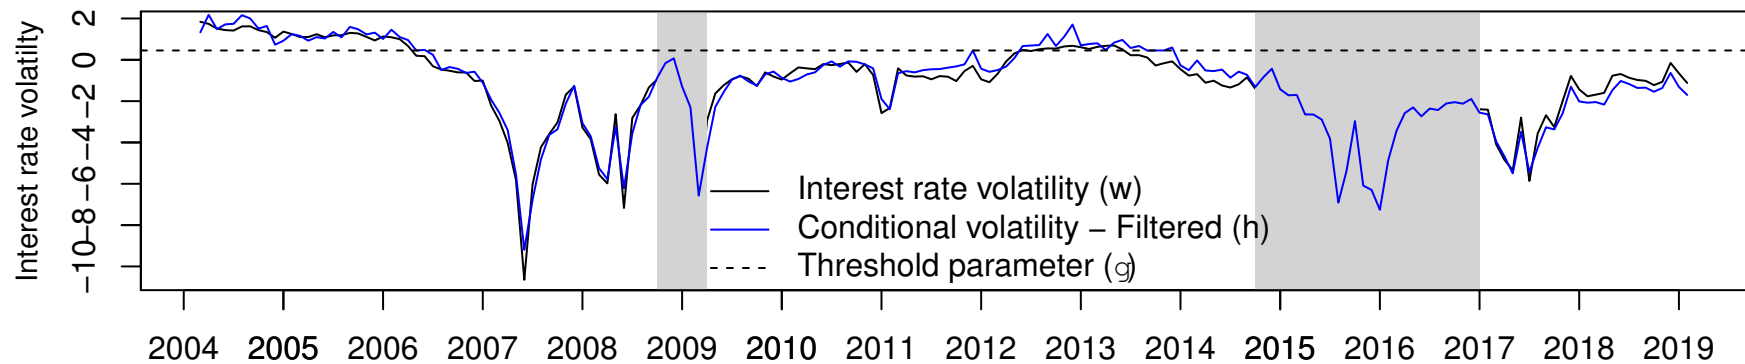

(b) DSST/E&F/NDR

Supplement: Supplementary file 27 [file j_snde-2019-0122_suppl.zip]

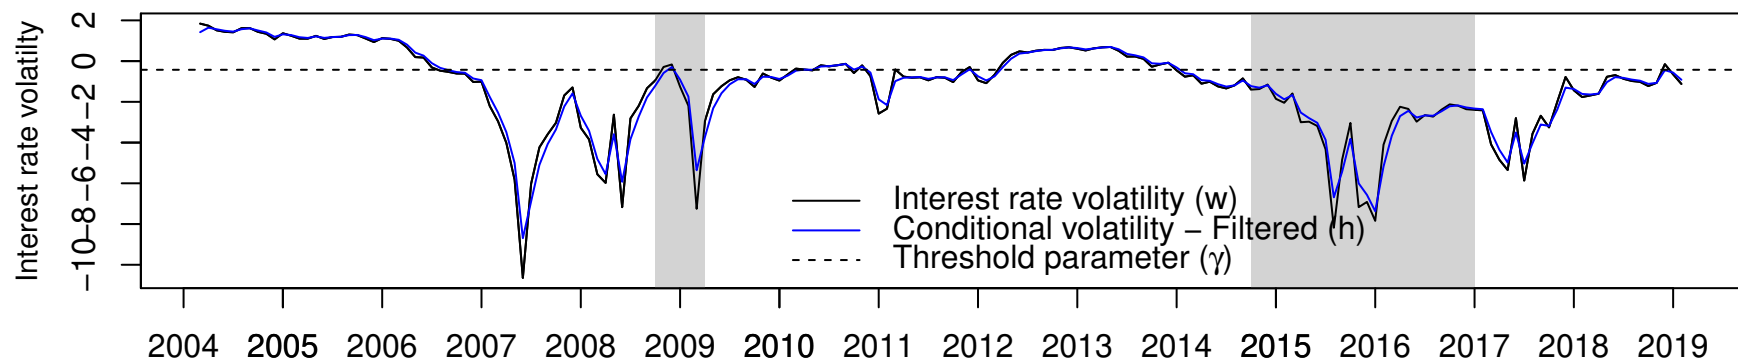

(a) DSST/E/DR

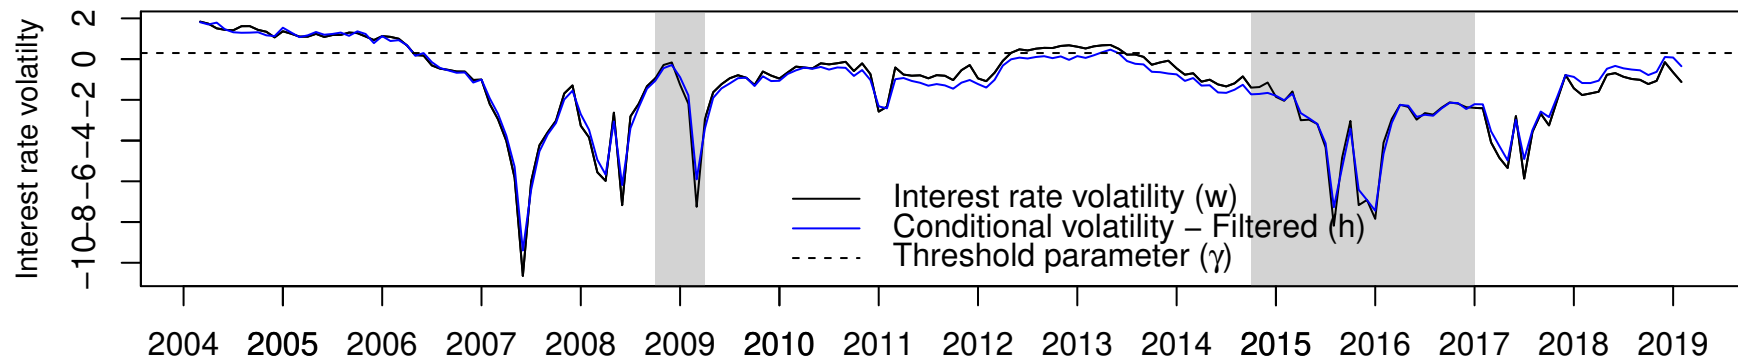

(b) DSST/E/NDR

Supplement: Supplementary file 28 [file j_snde-2019-0122_suppl.zip]

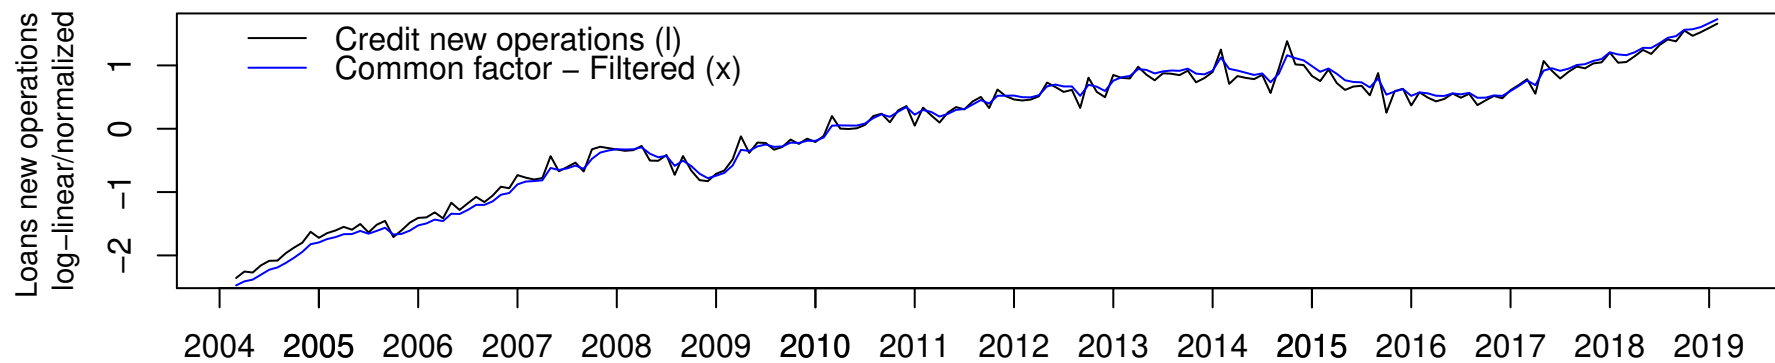

(a) DSST/E&F/DR

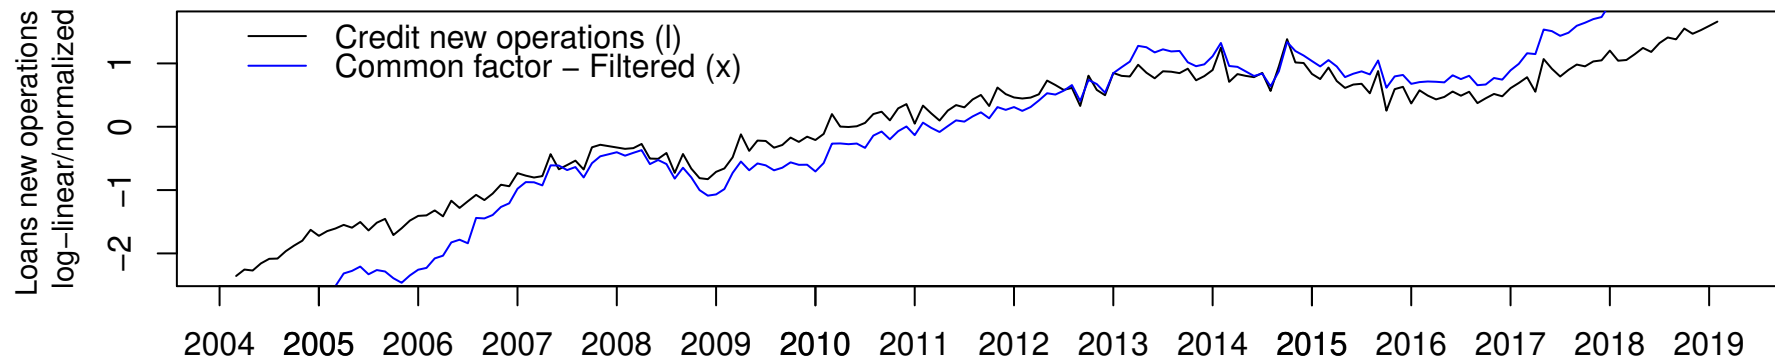

(b) DSST/E&F/NDR

Supplement: Supplementary file 29 [file j_snde-2019-0122_suppl.zip]

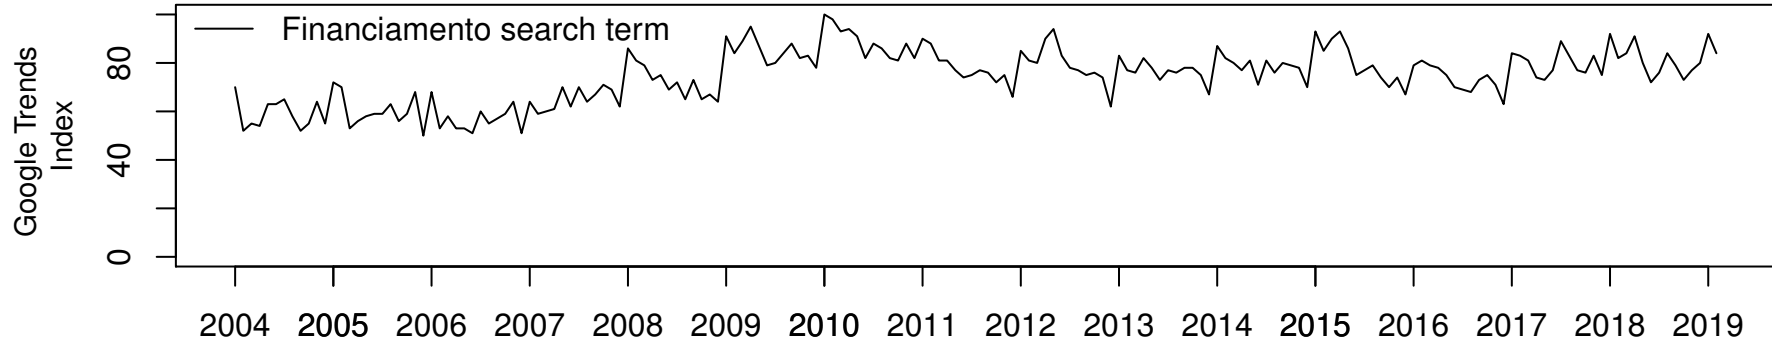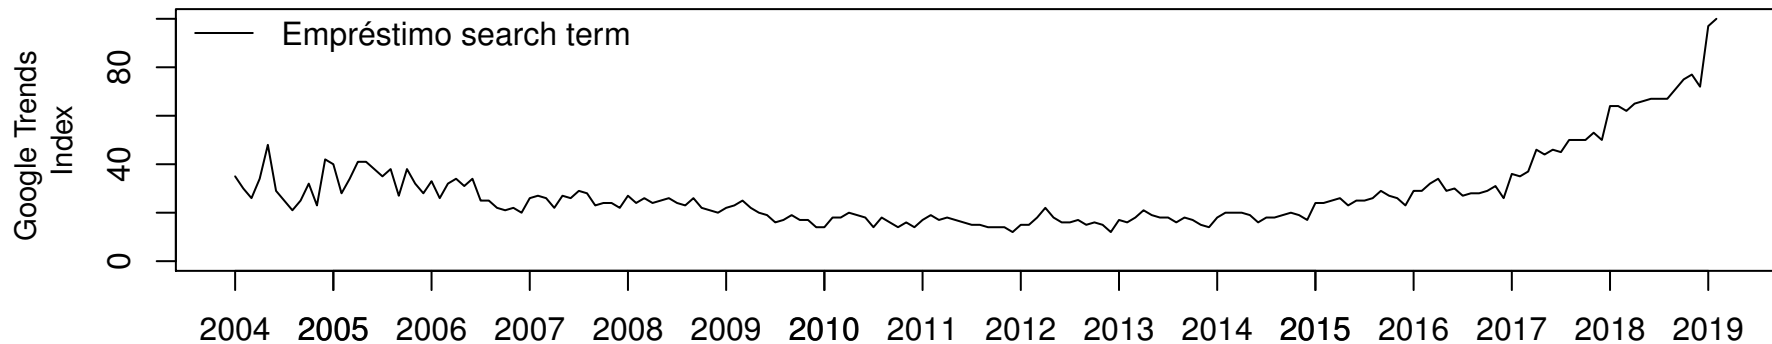

Supplement: Supplementary file 30 [file j_snde-2019-0122_suppl.zip]

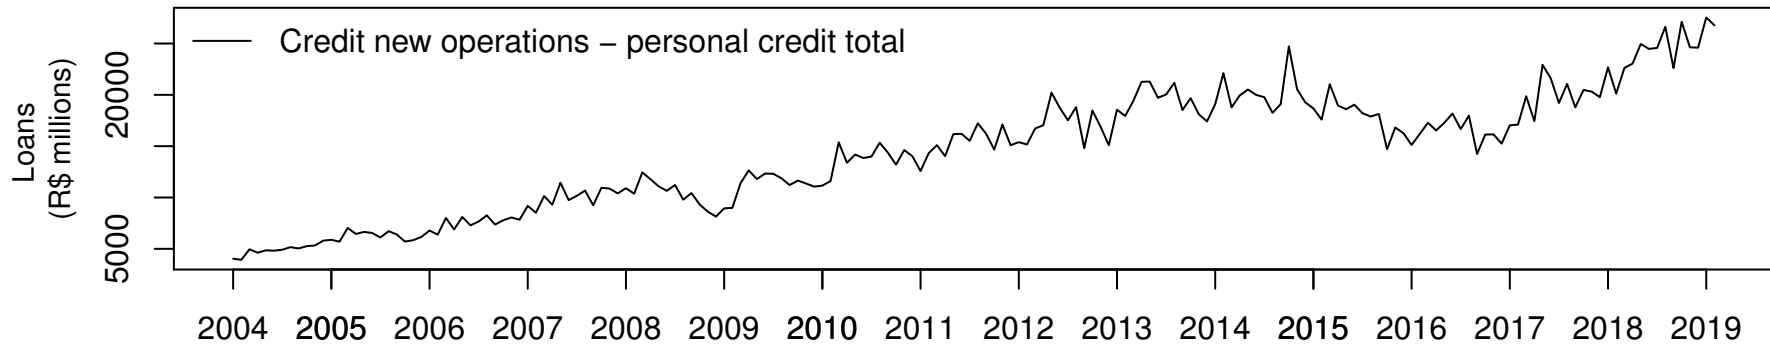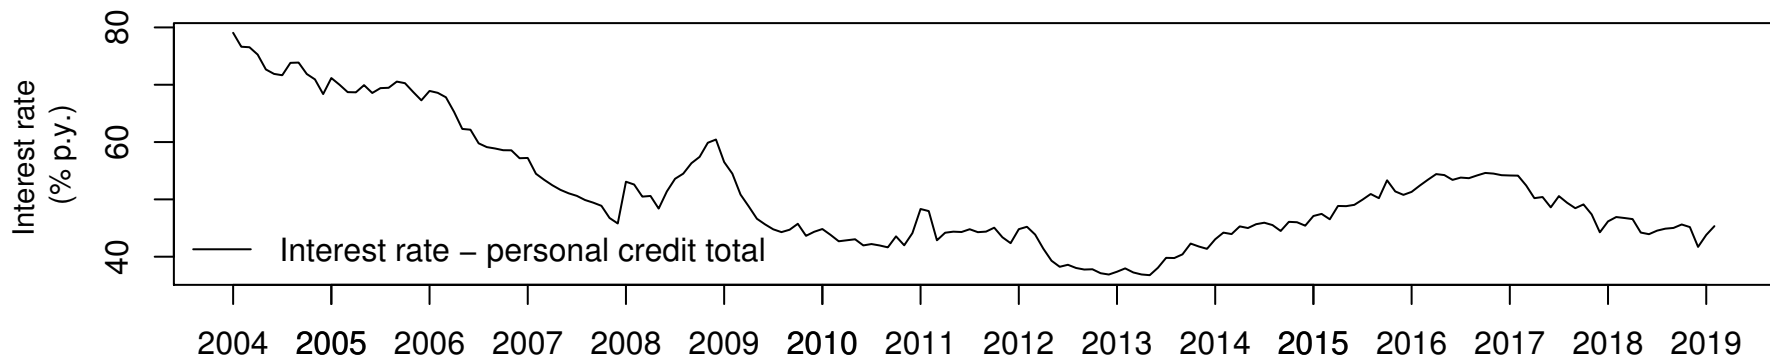

Supplement: Supplementary file 31 [file j_snde-2019-0122_suppl.zip]

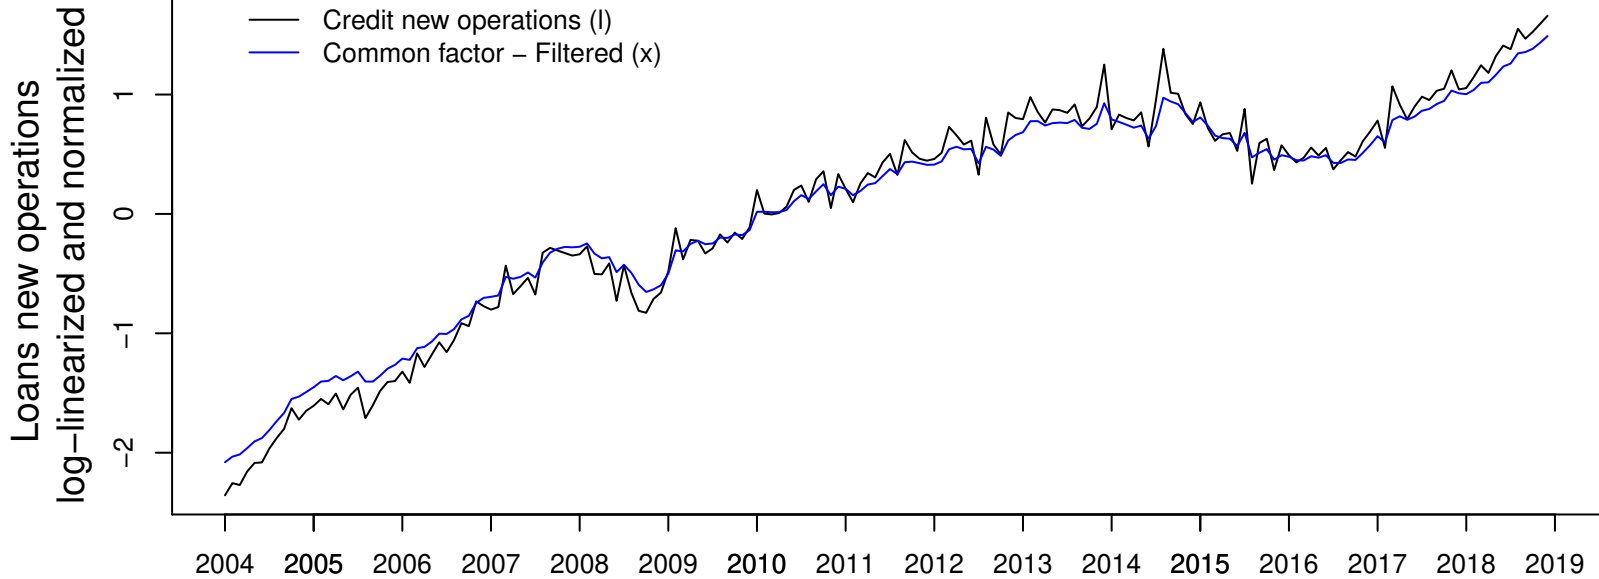

Supplement: Supplementary file 32 [file j_snde-2019-0122_suppl.zip]

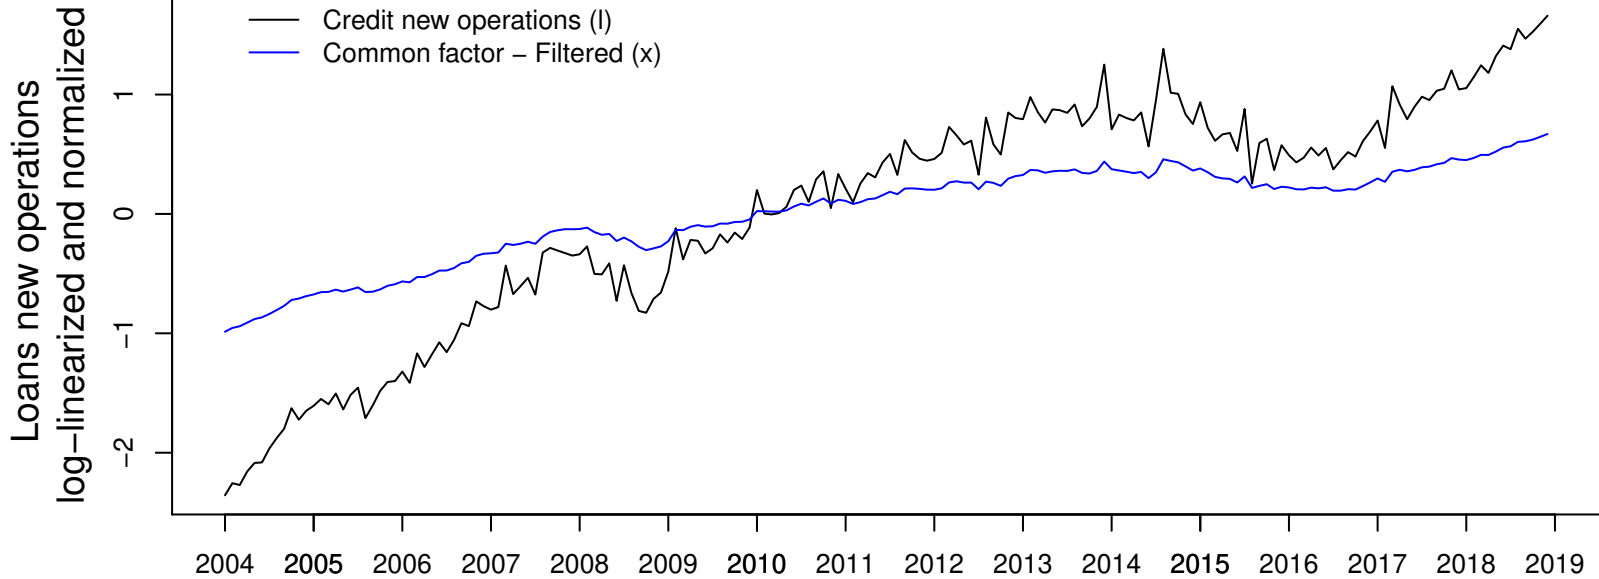

Supplement: Supplementary file 33 [file j_snde-2019-0122_suppl.zip]

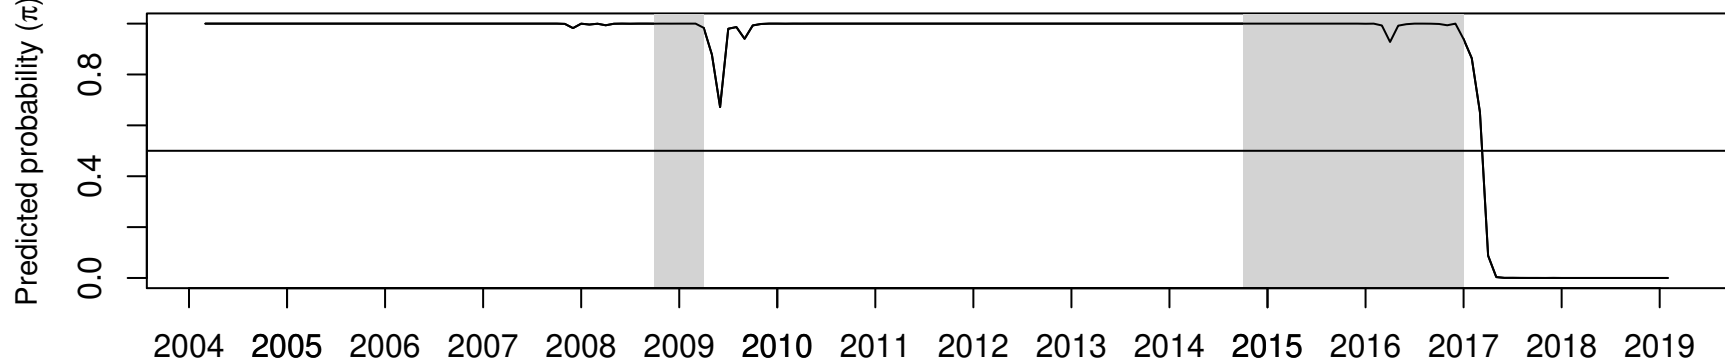

(a) DSSRS/E/DR model

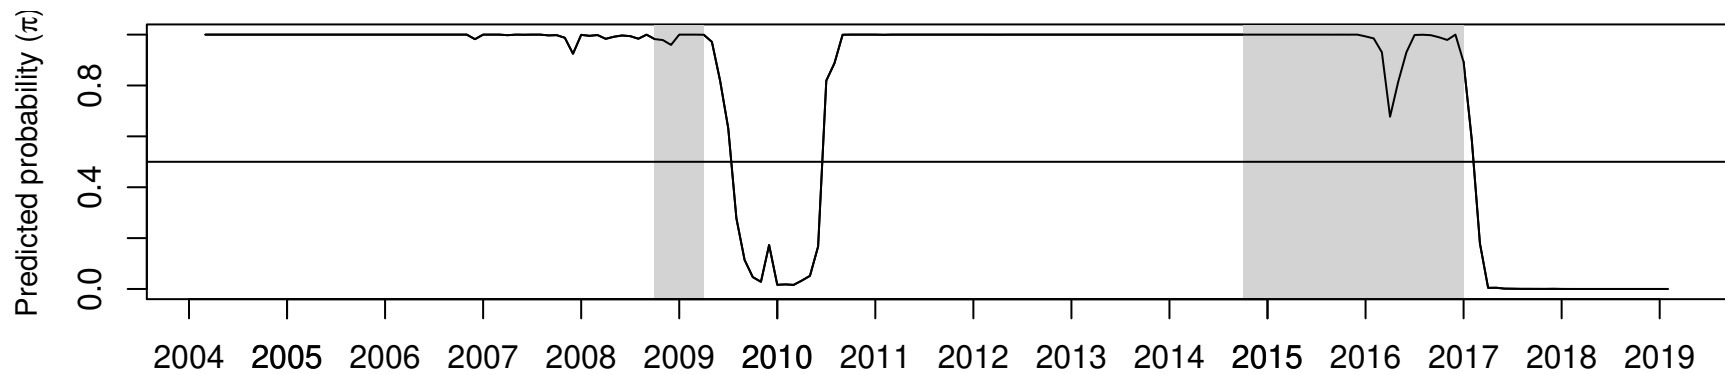

(b) DSSRS/E/NDR model

Supplement: Supplementary file 34 [file j_snde-2019-0122_suppl.zip]
